# Supplementary material for: An efficient numerical representation of genome sequence: natural vector with covariance component
Source: PeerJ. 2022 Jun 16;10:e13544. doi: 10.7717/peerj.13544 (PMC9206847; doi:10.7717/peerj.13544)
Supplement: Supplemental Information 1 [file peerj-10-13544-s001.xlsx]

## Sheet: Data S1 | Archaea
	Accession number	Sequence Length	Family name
	NC_000917	2178400	Archaeoglobaceae
	NZ_CP006577	2316287	Archaeoglobaceae
	NC_021169	2076931	Archaeoglobaceae
	NC_015320	1901943	Archaeoglobaceae
	NC_013741	1560622	Archaeoglobaceae
	NC_013849	2196266	Archaeoglobaceae
	NZ_CP011267	1770093	Archaeoglobaceae
	NZ_CP009552	1860815	Archaeoglobaceae
	NC_000854	1669696	Desulfurococcaceae
	NC_022521	1595994	Desulfurococcaceae
	NC_018001	1384116	Desulfurococcaceae
	NC_011766	1365223	Desulfurococcaceae
	NC_014961	1314639	Desulfurococcaceae
	NC_009776	1297538	Desulfurococcaceae
	NZ_CP006867	1394664	Desulfurococcaceae
	NC_014205	1580347	Desulfurococcaceae
	NC_009033	1570485	Desulfurococcaceae
	NC_017954	1356318	Desulfurococcaceae
	NC_014160	1316595	Desulfurococcaceae
	NC_000854	1669696	Desulfurococcaceae
	NC_022521	1595994	Desulfurococcaceae
	NC_018001	1384116	Desulfurococcaceae
	NC_011766	1365223	Desulfurococcaceae
	NC_014961	1314639	Desulfurococcaceae
	NC_009776	1297538	Desulfurococcaceae
	NZ_CP006867	1394664	Desulfurococcaceae
	NC_014205	1580347	Desulfurococcaceae
	NC_009033	1570485	Desulfurococcaceae
	NC_017954	1356318	Desulfurococcaceae
	NC_014160	1316595	Desulfurococcaceae
	NZ_CP028858	2723120	Haloarculaceae
	NZ_CP031310	3452056	Haloarculaceae
	NZ_CP039138	3131618	Haloarculaceae
	NZ_CP019154	2966258	Haloarculaceae
	NZ_CP010529	3423144	Haloarculaceae
	NZ_CP050014	3596572	Haloarculaceae
	NC_013202	3110487	Haloarculaceae
	NZ_CP044129	3105114	Haloarculaceae
	NZ_CP045142	3094203	Haloarculaceae
	NZ_CP039375	3094196	Haloarculaceae
	NC_013158	3116795	Haloarculaceae
	NC_021921	2815791	Haloarculaceae
	NZ_CP033878	2628395	Haloarculaceae
	NZ_CP019067	3381613	Haloarculaceae
	NZ_CP058909	5199031	Haloarculaceae
	NZ_CP058910	4480147	Haloarculaceae
	NC_007426	2595221	Haloarculaceae
	NC_020388	2912573	Haloarculaceae
	NZ_CP058334	3211682	Haloarculaceae
	NZ_CP058335	3746575	Haloarculaceae
	NZ_CP008874	2085482	Halobacteriaceae
	NZ_CP011564	2129244	Halobacteriaceae
	NC_010364	2000962	Halobacteriaceae
	NZ_CP007060	2846968	Halobacteriaceae
	NC_002607	2014239	Halobacteriaceae
	NZ_CP038631	2178608	Halobacteriaceae
	NZ_CP016070	1972283	Halobacteriaceae
	NZ_CP016804	2085946	Halobacteriaceae
	NZ_CP035119	3017361	Halobacteriaceae
	NZ_CP044523	3636252	Halobacteriaceae
	NZ_CP040678	3203198	Halobacteriaceae
	NZ_CP054707	1981916	Halobacteriaceae
	NZ_CP042241	2344456	Halobacteriaceae
	NZ_CP031311	2958395	Haloferacaceae
	NZ_CP039139	2948887	Haloferacaceae
	NC_017941	2948884	Haloferacaceae
	NC_013967	2847757	Haloferacaceae
	NZ_CP011947	2945391	Haloferacaceae
	NZ_CP048739	3994321	Haloferacaceae
	NC_014729	2820544	Haloferacaceae
	NZ_CP050274	2818554	Haloferacaceae
	NZ_CP031150	3325235	Haloferacaceae
	NZ_CP034345	3292487	Haloferacaceae
	NZ_CP031148	3401387	Haloferacaceae
	NZ_CP034145	3461954	Haloferacaceae
	NZ_CP039833	3051700	Haloferacaceae
	NC_017459	3148033	Haloferacaceae
	NC_008212	3132494	Haloferacaceae
	NZ_CP058529	3678615	Halorubraceae
	NZ_CP058579	4019272	Halorubraceae
	NZ_CP034940	3062294	Halorubraceae
	NZ_CP030064	2743692	Halorubraceae
	NZ_CP053941	2937429	Halorubraceae
	NZ_CP054585	3218340	Halorubraceae
	NZ_CP034692	3374117	Halorubraceae
	NZ_CP026309	4250563	Halorubraceae
	NZ_CP054587	2904575	Halorubraceae
	NC_015216	2583753	Methanobacteriaceae
	NZ_CP017768	2515817	Methanobacteriaceae
	NZ_CP017766	2506225	Methanobacteriaceae
	NZ_CP006933	2449987	Methanobacteriaceae
	NC_015574	2546541	Methanobacteriaceae
	NZ_CP017767	2524329	Methanobacteriaceae
	NC_023044	2029766	Methanobacteriaceae
	NC_009515	1853160	Methanobacteriaceae
	NZ_CP011266	2543538	Methanobacteriaceae
	NZ_CP017803	1805545	Methanobacteriaceae
	NC_013790	2937203	Methanobacteriaceae
	NZ_CP014265	2201192	Methanobacteriaceae
	NC_021355	1998189	Methanobacteriaceae
	NZ_CP010834	2273296	Methanobacteriaceae
	NC_007681	1767403	Methanobacteriaceae
	NZ_CP014213	2868093	Methanobacteriaceae
	NC_000916	1751377	Methanobacteriaceae
	NZ_CP042937	1741029	Methanobacteriaceae
	NZ_CP043480	1697935	Methanobacteriaceae
	NZ_CP009149	1607556	Methanocaldococcaceae
	NC_014122	1328194	Methanocaldococcaceae
	NC_013407	1746329	Methanocaldococcaceae
	NC_013156	1485061	Methanocaldococcaceae
	NC_013887	1760939	Methanocaldococcaceae
	NC_015562	1854197	Methanocaldococcaceae
	NZ_CP026606	1714918	Methanococcaceae
	NZ_CP020120	1737606	Methanococcaceae
	NC_009975	1744193	Methanococcaceae
	NC_009135	1780761	Methanococcaceae
	NC_009637	1772694	Methanococcaceae
	NC_009635	1569500	Methanococcaceae
	NC_009634	1720048	Methanococcaceae
	NC_014222	1936387	Methanococcaceae
	NC_005791	1661137	Methanococcaceae
	NC_015636	1662525	Methanococcaceae
	NZ_CP047880	1889135	Methanomassiliicoccaceae
	NZ_CP010070	1488669	Methanomassiliicoccaceae
	NC_021353	1931651	Methanomassiliicoccaceae
	NC_018227	2789774	Methanomicrobiaceae
	NC_014507	2843290	Methanomicrobiaceae
	NZ_CP009518	2394636	Methanosarcinaceae
	NC_007955	2575032	Methanosarcinaceae
	NC_014253	2242317	Methanosarcinaceae
	NC_014002	2012424	Methanosarcinaceae
	NZ_CP017921	2022959	Methanosarcinaceae
	NZ_CP058215	2704953	Methanosarcinaceae
	NC_019977	2428904	Methanosarcinaceae
	NC_015676	2138444	Methanosarcinaceae
	NZ_CP009509	4096482	Methanosarcinaceae
	NZ_CP009511	4066551	Methanosarcinaceae
	NC_007355	4837408	Methanosarcinaceae
	NZ_CP009514	4166241	Methanosarcinaceae
	NC_003552	5751492	Methanosarcinaceae
	NZ_CP009508	5427890	Methanosarcinaceae
	NZ_CP009528	4533209	Methanosarcinaceae
	NZ_CP042908	4323149	Methanosarcinaceae
	NC_003901	4096345	Methanosarcinaceae
	NZ_CP009516	5018607	Methanosarcinaceae
	NZ_CP009526	4874815	Methanosarcinaceae
	NZ_CP009512	4142816	Methanosarcinaceae
	NZ_CP032683	3283688	Methanosarcinaceae
	NZ_CP009506	5017558	Methanosarcinaceae
	NZ_CP009502	3130228	Methanosarcinaceae
	NZ_CP008746	4501171	Methanosarcinaceae
	NZ_CP009520	4505752	Methanosarcinaceae
	NZ_CP009513	4154344	Methanosarcinaceae
	NZ_CP009515	4139808	Methanosarcinaceae
	NZ_CP009503	4137337	Methanosarcinaceae
	NZ_CP009505	4211468	Methanosarcinaceae
	NZ_CP009524	4499114	Methanosarcinaceae
	NZ_CP019285	4161587	Natrialbaceae
	NC_015666	3668009	Natrialbaceae
	NZ_CP007055	2789326	Natrialbaceae
	NC_013743	3889038	Natrialbaceae
	NZ_CP019327	3397437	Natrialbaceae
	NZ_CP058601	4359796	Natrialbaceae
	NC_019964	3223876	Natrialbaceae
	NZ_CP027033	3617932	Natrialbaceae
	NZ_CP024047	3521804	Natrialbaceae
	NZ_CP019893	3930546	Natrialbaceae
	NC_013922	3751858	Natrialbaceae
	NZ_CP040330	3747116	Natrialbaceae
	NC_019962	3790479	Natrialbaceae
	NZ_CP040637	3503953	Natrialbaceae
	NZ_CP059154	3779651	Natrialbaceae
	NC_019792	3788356	Natrialbaceae
	NC_019974	4013216	Natrialbaceae
	NZ_CP045488	3352994	Natrialbaceae
	NZ_CP031305	3079186	Natrialbaceae
	NC_021313	3255260	Natrialbaceae
	NZ_CP021324	1360076	Nitrosopumilaceae
	NZ_CP030847	1720730	Nitrosopumilaceae
	NZ_CP010868	1713078	Nitrosopumilaceae
	NZ_CP011070	1803090	Nitrosopumilaceae
	NZ_CP035425	1499620	Nitrosopumilaceae
	NZ_CP026993	1563356	Nitrosopumilaceae
	NC_018656	1690905	Nitrosopumilaceae
	NC_010085	1645259	Nitrosopumilaceae
	NC_018655	1639964	Nitrosopumilaceae
	NZ_CP026995	2171418	Nitrosopumilaceae
	NZ_CP026994	1585110	Nitrosopumilaceae
	NZ_CP017922	2989777	Nitrososphaeraceae
	NC_018719	2833868	Nitrososphaeraceae
	NZ_CP007174	2954373	Nitrososphaeraceae
	NZ_CP007536	2527938	Nitrososphaeraceae
	NC_008818	1667163	Pyrodictiaceae
	NZ_CP013011	2023836	Pyrodictiaceae
	NC_015931	1843267	Pyrodictiaceae
	NC_008818	1667163	Pyrodictiaceae
	NZ_CP013011	2023836	Pyrodictiaceae
	NC_015931	1843267	Pyrodictiaceae
	NZ_CP029289	2947244	Sulfolobaceae
	NC_015518	2137654	Sulfolobaceae
	NZ_CP020477	2687463	Sulfolobaceae
	NZ_CP029289	2947244	Sulfolobaceae
	NC_015518	2137654	Sulfolobaceae
	NZ_CP020477	2687463	Sulfolobaceae
	NZ_CP045482	2252027	Sulfolobaceae
	NZ_CP029288	2265309	Sulfolobaceae
	NZ_CP012175	2191533	Sulfolobaceae
	NZ_CP012176	2191533	Sulfolobaceae
	NZ_CP012172	2191533	Sulfolobaceae
	NC_015435	1840348	Sulfolobaceae
	NZ_CP049074	2176897	Sulfolobaceae
	NZ_CP012174	2191531	Sulfolobaceae
	NC_009440	2191517	Sulfolobaceae
	NZ_CP012173	2191529	Sulfolobaceae
	NZ_CP029287	2544115	Sulfolobaceae
	NZ_CP011055	2727312	Sulfolobaceae
	NZ_CP011056	2727312	Sulfolobaceae
	NC_002754	2992245	Sulfolobaceae
	NZ_CP033238	2658139	Sulfolobaceae
	NZ_CP011057	2727312	Sulfolobaceae
	NC_017274	2668974	Sulfolobaceae
	NZ_CP033236	2668974	Sulfolobaceae
	NZ_CP033241	2707507	Sulfolobaceae
	NZ_CP033239	2658139	Sulfolobaceae
	NZ_CP033235	2668974	Sulfolobaceae
	NZ_CP033237	2668974	Sulfolobaceae
	NZ_CP033240	2659140	Sulfolobaceae
	NZ_CP045483	1987069	Sulfolobaceae
	NC_020247	2223983	Sulfolobaceae
	NC_012589	2736272	Sulfolobaceae
	NZ_CP020360	2171591	Sulfolobaceae
	NC_020246	2176362	Sulfolobaceae
	NC_007181	2225959	Sulfolobaceae
	NC_012726	2586647	Sulfolobaceae
	NC_012588	2608832	Sulfolobaceae
	NC_012622	2702058	Sulfolobaceae
	NZ_CP020364	2225849	Sulfolobaceae
	NC_012632	2692402	Sulfolobaceae
	NC_012623	2812165	Sulfolobaceae
	NC_017276	2522992	Sulfolobaceae
	NZ_CP020363	2238200	Sulfolobaceae
	NC_021058	2465177	Sulfolobaceae
	NZ_CP020361	2270336	Sulfolobaceae
	NZ_CP035730	2789526	Sulfolobaceae
	NZ_CP045706	2549580	Sulfolobaceae
	NZ_CP017006	2688317	Sulfolobaceae
	NZ_CP045687	2543529	Sulfolobaceae
	NZ_CP045484	2803915	Sulfolobaceae
	NC_003106	2694756	Sulfolobaceae
	NZ_CP006019	1859370	Thermococcaceae
	NC_015680	1716818	Thermococcaceae
	NC_003413	1908256	Thermococcaceae
	NC_000961	1738505	Thermococcaceae
	NC_000868	1765118	Thermococcaceae
	NZ_CP023154	1889914	Thermococcaceae
	NZ_CP010835	1977126	Thermococcaceae
	NC_015474	1861320	Thermococcaceae
	NC_017946	1736885	Thermococcaceae
	NZ_CP015102	1785673	Thermococcaceae
	NC_006624	2088737	Thermococcaceae
	NC_012883	1845800	Thermococcaceae
	NZ_CP015105	2065932	Thermococcaceae
	NZ_CP015106	1868990	Thermococcaceae
	NZ_CP007264	1976356	Thermococcaceae
	NZ_CP014855	1674122	Thermococcaceae
	NZ_CP014750	1847000	Thermococcaceae
	NZ_CP015103	2029167	Thermococcaceae
	NC_014804	2010078	Thermococcaceae
	NZ_CP014862	2005098	Thermococcaceae
	NZ_CP013050	2388527	Thermococcaceae
	NZ_CP014854	1866819	Thermococcaceae
	NZ_CP015520	1928800	Thermococcaceae
	NC_011529	1847607	Thermococcaceae
	NC_018015	1950313	Thermococcaceae
	NC_012804	2045438	Thermococcaceae
	NZ_CP006965	1957742	Thermococcaceae
	NZ_CP008887	2122535	Thermococcaceae
	NZ_CP007140	1920914	Thermococcaceae
	NZ_CP015193	1961979	Thermococcaceae
	NC_015865	2011320	Thermococcaceae
	NZ_CP012200	1961221	Thermococcaceae
	NZ_CP021848	1854909	Thermococcaceae
	NZ_CP041932	2165038	Thermococcaceae
	NZ_CP015104	1522818	Thermococcaceae
	NC_016051	2086428	Thermococcaceae
	NZ_CP040846	2226336	Thermococcaceae
	NC_002578	1564906	Thermoplasmataceae
	NC_002689	1584804	Thermoplasmataceae
	NC_009954	2077567	Thermoproteaceae
	NC_010525	1769823	Thermoproteaceae
	NC_009376	2121076	Thermoproteaceae
	NC_008701	1826402	Thermoproteaceae
	NC_016645	2467972	Thermoproteaceae
	NC_003364	2222430	Thermoproteaceae
	NC_015315	1936063	Thermoproteaceae
	NC_016070	1841542	Thermoproteaceae
	NC_015151	2298983	Thermoproteaceae
	NC_014537	2374137	Thermoproteaceae
