# Supplementary material for: An efficient numerical representation of genome sequence: natural vector with covariance component
Source: PeerJ. 2022 Jun 16;10:e13544. doi: 10.7717/peerj.13544 (PMC9206847; doi:10.7717/peerj.13544)
Supplement: Supplemental Information 2 [file peerj-10-13544-s002.xlsx]

## Sheet: Data S2 | Bacteria
	Accession number	Sequence Length	Family name
	AP018515	3041114	Acetobacteraceae
	CP022374	3127455	Acetobacteraceae
	HF677570	2818679	Acetobacteraceae
	AP011121	2907495	Acetobacteraceae
	AP011163	2815241	Acetobacteraceae
	AP011128	2907287	Acetobacteraceae
	AP011135	2906044	Acetobacteraceae
	AP011170	2904624	Acetobacteraceae
	AP011142	2907267	Acetobacteraceae
	AP011149	2907309	Acetobacteraceae
	AP011156	2904642	Acetobacteraceae
	AP014881	2902389	Acetobacteraceae
	CP039846	2425416	Acetobacteraceae
	CP015164	2859878	Acetobacteraceae
	CP021524	2901846	Acetobacteraceae
	CP015168	2810721	Acetobacteraceae
	CP021509	2754755	Acetobacteraceae
	CP021922	2996610	Acetobacteraceae
	CP014687	3230507	Acetobacteraceae
	CP023657	2848089	Acetobacteraceae
	CP023189	2969514	Acetobacteraceae
	LN606600	3889881	Acetobacteraceae
	CP042808	2744393	Acetobacteraceae
	CP030871	2785934	Acetobacteraceae
	CP043506	2814618	Acetobacteraceae
	CP011120	2799488	Acetobacteraceae
	CP022699	3988649	Acetobacteraceae
	CP029176	3907406	Acetobacteraceae
	CP000697	3389227	Acetobacteraceae
	AP012035	3749411	Acetobacteraceae
	AM889285	3944163	Acetobacteraceae
	CP001189	3887492	Acetobacteraceae
	CP014689	3107922	Acetobacteraceae
	LT900338	2704625	Acetobacteraceae
	CP000009	2702173	Acetobacteraceae
	CP004373	2882437	Acetobacteraceae
	CP003926	3602424	Acetobacteraceae
	CP016328	3606417	Acetobacteraceae
	CP043043	3382283	Acetobacteraceae
	CP000394	2708434	Acetobacteraceae
	CP003182	2729888	Acetobacteraceae
	CP018195	2708447	Acetobacteraceae
	CP003183	2742670	Acetobacteraceae
	CP003181	2721810	Acetobacteraceae
	CP018190	2709750	Acetobacteraceae
	CP018192	2690741	Acetobacteraceae
	CP018193	2708311	Acetobacteraceae
	CP018194	2738877	Acetobacteraceae
	CP018191	2738876	Acetobacteraceae
	CP021467	3448767	Acetobacteraceae
	AP012159	3136818	Acetobacteraceae
	CP019875	3485191	Acetobacteraceae
	CP023036	3192540	Acetobacteraceae
	CP036404	3105849	Acetobacteraceae
	CP004360	3447725	Acetobacteraceae
	CP041348	3527401	Acetobacteraceae
	CP024644	3563314	Acetobacteraceae
	CP014674	2888029	Acetobacteraceae
	CP014681	2807246	Acetobacteraceae
	CP038143	1938936	Acetobacteraceae
	CP032485	2477279	Acetobacteraceae
	CP015583	4328147	Acetobacteraceae
	CP015584	702334	Acetobacteraceae
	CP044114	257335	Acetobacteraceae
	CP044115	406211	Acetobacteraceae
	CP044116	59054	Acetobacteraceae
	CP044117	4244047	Acetobacteraceae
	CP025060	4244280	Acetobacteraceae
	CP025196	4135189	Acetobacteraceae
	CP024588	4180106	Acetobacteraceae
	AP019700	5832650	Acetobacteraceae
	AP019701	5339096	Acetobacteraceae
	AP019702	5834761	Acetobacteraceae
	CP038141	2163214	Acetobacteraceae
	CP038231	1945806	Acetobacteraceae
	LR215048	1883099	Acholeplasmataceae
	LR215050	1456175	Acholeplasmataceae
	CP000896	1496992	Acholeplasmataceae
	LS483439	1497557	Acholeplasmataceae
	LK028559	1587120	Acholeplasmataceae
	CP000061	706569	Acholeplasmataceae
	CP035949	600116	Acholeplasmataceae
	FO681348	1877792	Acholeplasmataceae
	FO681347	1554229	Acholeplasmataceae
	CP015149	576118	Acholeplasmataceae
	CP002573	2932225	Acidithiobacillaceae
	CP026328	2726366	Acidithiobacillaceae
	AP018795	2921399	Acidithiobacillaceae
	CP002985	3207552	Acidithiobacillaceae
	CP001219	2982397	Acidithiobacillaceae
	CP001132	2885038	Acidithiobacillaceae
	CP044411	2933811	Acidithiobacillaceae
	CP045571	3415726	Acidithiobacillaceae
	CP030840	7112011	Acidobacteriaceae
	CP003130	6237577	Acidobacteriaceae
	CP002480	4309153	Acidobacteriaceae
	CP042806	6405582	Acidobacteriaceae
	CP003379	5227858	Acidobacteriaceae
	CP002467	5095226	Acidobacteriaceae
	CP020468	2359360	Actinomycetaceae
	LR134350	3148934	Actinomycetaceae
	LR134357	2572997	Actinomycetaceae
	CP012072	2049088	Actinomycetaceae
	AP017894	3040449	Actinomycetaceae
	CP014232	3042917	Actinomycetaceae
	CP025228	3988549	Actinomycetaceae
	CP014228	3051613	Actinomycetaceae
	LR134363	3220508	Actinomycetaceae
	CP025227	3107761	Actinomycetaceae
	CP025249	3141809	Actinomycetaceae
	AP017896	2877864	Actinomycetaceae
	CP039292	3600355	Actinomycetaceae
	LT635457	1892549	Actinomycetaceae
	CP040005	3097489	Actinomycetaceae
	CP012590	3836419	Actinomycetaceae
	CP040503	2526493	Actinomycetaceae
	CP027236	3244017	Actinomycetaceae
	CP017812	2207832	Actinomycetaceae
	CP027862	3761642	Actinomycetaceae
	LR134477	3491241	Actinomycetaceae
	CP040505	2230588	Actinomycetaceae
	CP046315	2432635	Actinomycetaceae
	CP040006	2360133	Actinomycetaceae
	LR134476	2043249	Actinomycetaceae
	CP012649	2295822	Actinomycetaceae
	CP028833	2338282	Actinomycetaceae
	CP033902	2332403	Actinomycetaceae
	CP033903	2245225	Actinomycetaceae
	CP029004	2384672	Actinomycetaceae
	CP033904	2384650	Actinomycetaceae
	CP033905	2427168	Actinomycetaceae
	CP029001	2382253	Actinomycetaceae
	CP007519	2338390	Actinomycetaceae
	CP007003	2272494	Actinomycetaceae
	CP014159	1634920	Aerococcaceae
	CP014160	2033849	Aerococcaceae
	CP002512	2080974	Aerococcaceae
	CP014161	1974262	Aerococcaceae
	CP014162	2013339	Aerococcaceae
	CP013988	2054328	Aerococcaceae
	CP014163	1831400	Aerococcaceae
	CP014164	2199877	Aerococcaceae
	CP046334	2082214	Aerococcaceae
	AP019195	4611279	Aeromonadaceae
	CP024198	4551368	Aeromonadaceae
	CP026055	4518310	Aeromonadaceae
	LS483441	4586140	Aeromonadaceae
	CP025777	4690132	Aeromonadaceae
	CP025705	4702913	Aeromonadaceae
	CP025706	4650143	Aeromonadaceae
	CP039832	4684096	Aeromonadaceae
	CP023141	4868053	Aeromonadaceae
	LR134376	4542521	Aeromonadaceae
	CP006579	4527993	Aeromonadaceae
	AP019193	4962478	Aeromonadaceae
	CP006883	5000814	Aeromonadaceae
	CP005966	5024500	Aeromonadaceae
	CP006870	5279644	Aeromonadaceae
	CP038465	5117112	Aeromonadaceae
	CP011100	4908265	Aeromonadaceae
	CP016380	4906118	Aeromonadaceae
	CP010947	4884823	Aeromonadaceae
	CP013965	5100520	Aeromonadaceae
	CP016392	4951765	Aeromonadaceae
	CP046954	4941513	Aeromonadaceae
	CP013178	5127362	Aeromonadaceae
	CP027804	4911246	Aeromonadaceae
	CP018201	4783504	Aeromonadaceae
	CP028418	4139625	Aeromonadaceae
	CP038463	5145899	Aeromonadaceae
	CP016989	5159182	Aeromonadaceae
	CP016990	4955171	Aeromonadaceae
	CP000462	4744448	Aeromonadaceae
	CP028568	5022876	Aeromonadaceae
	CP007518	4796281	Aeromonadaceae
	CP047962	4710838	Aeromonadaceae
	CP007567	4777154	Aeromonadaceae
	CP027856	4508901	Aeromonadaceae
	CP022550	4806250	Aeromonadaceae
	CP022175	4723196	Aeromonadaceae
	CP022181	4715196	Aeromonadaceae
	CP022186	4730032	Aeromonadaceae
	CP017143	4783004	Aeromonadaceae
	CP022426	5012649	Aeromonadaceae
	CP027000	4736282	Aeromonadaceae
	CP000644	4702402	Aeromonadaceae
	CP048223	4702618	Aeromonadaceae
	CP047374	4632948	Aeromonadaceae
	CP047376	4617865	Aeromonadaceae
	CP038102	4739953	Aeromonadaceae
	CP039611	4350713	Aeromonadaceae
	CP013067	4400034	Aeromonadaceae
	CP026228	4984360	Aeromonadaceae
	CP026406	4801408	Aeromonadaceae
	CP026222	4797236	Aeromonadaceae
	CP026217	5216518	Aeromonadaceae
	CP026122	4759223	Aeromonadaceae
	CP026226	4817060	Aeromonadaceae
	CP023818	5099209	Aeromonadaceae
	CP023817	4615599	Aeromonadaceae
	CP021654	4811606	Aeromonadaceae
	CP002607	4551783	Aeromonadaceae
	CP028133	4652208	Aeromonadaceae
	CP046407	4744657	Aeromonadaceae
	CP047155	4807642	Aeromonadaceae
	CP014774	4756751	Aeromonadaceae
	CP015448	4584103	Aeromonadaceae
	CP032839	4666657	Aeromonadaceae
	CP044060	4559061	Aeromonadaceae
	CP040717	4604603	Aeromonadaceae
	CP033604	4683931	Aeromonadaceae
	CP012504	4923009	Aeromonadaceae
	CP024933	4773186	Aeromonadaceae
	LT629973	3074078	Akkermansiaceae
	CP001071	2664102	Akkermansiaceae
	LR699001	2762447	Akkermansiaceae
	AP021898	2845645	Akkermansiaceae
	CP036293	2801917	Akkermansiaceae
	CP025827	2764297	Akkermansiaceae
	CP025828	2763965	Akkermansiaceae
	CP025833	2770124	Akkermansiaceae
	CP025836	2724154	Akkermansiaceae
	CP025823	2799431	Akkermansiaceae
	CP033388	2860407	Akkermansiaceae
	CP042830	2664043	Akkermansiaceae
	CP024736	2772237	Akkermansiaceae
	CP025825	2763834	Akkermansiaceae
	CP025826	2764311	Akkermansiaceae
	CP025829	2764188	Akkermansiaceae
	CP025830	2770098	Akkermansiaceae
	CP025831	2770073	Akkermansiaceae
	CP025832	2770146	Akkermansiaceae
	CP025834	2724248	Akkermansiaceae
	CP024742	2764211	Akkermansiaceae
	CP025835	2724186	Akkermansiaceae
	CP025837	2724161	Akkermansiaceae
	CP029697	2782478	Akkermansiaceae
	CP029698	2782314	Akkermansiaceae
	CP029699	2782334	Akkermansiaceae
	CP029700	2803530	Akkermansiaceae
	CP027003	2734231	Akkermansiaceae
	CP027004	2734254	Akkermansiaceae
	CP027005	2888371	Akkermansiaceae
	CP024738	2663833	Akkermansiaceae
	CP027006	2888305	Akkermansiaceae
	CP027007	2836174	Akkermansiaceae
	CP027008	2724254	Akkermansiaceae
	CP027009	2724277	Akkermansiaceae
	CP027011	2724313	Akkermansiaceae
	CP027010	2724300	Akkermansiaceae
	CP027012	2836880	Akkermansiaceae
	CP027013	2836855	Akkermansiaceae
	CP029753	3156561	Akkermansiaceae
	CP024740	2664010	Akkermansiaceae
	CP029701	3156483	Akkermansiaceae
	CP029703	2844782	Akkermansiaceae
	CP029704	2844797	Akkermansiaceae
	CP029705	2844777	Akkermansiaceae
	CP029706	2844808	Akkermansiaceae
	CP029695	2736695	Akkermansiaceae
	CP029696	2810249	Akkermansiaceae
	CP025824	2824041	Akkermansiaceae
	CP015409	2745278	Akkermansiaceae
	CP033730	7010850	Alcaligenaceae
	CP020917	6929205	Alcaligenaceae
	CP013923	6226215	Alcaligenaceae
	CP019325	6492697	Alcaligenaceae
	CP026973	6523893	Alcaligenaceae
	CP038034	6428890	Alcaligenaceae
	LR134361	6472476	Alcaligenaceae
	CP026124	6648943	Alcaligenaceae
	CP032084	6236552	Alcaligenaceae
	CP025030	6425783	Alcaligenaceae
	CP023270	6340208	Alcaligenaceae
	LR134302	6407029	Alcaligenaceae
	CP034689	6687823	Alcaligenaceae
	CP002287	7013095	Alcaligenaceae
	LN831029	6813182	Alcaligenaceae
	LN890335	6501194	Alcaligenaceae
	LN890476	6626924	Alcaligenaceae
	LN890477	6690584	Alcaligenaceae
	CP043820	6402982	Alcaligenaceae
	CP045222	5943204	Alcaligenaceae
	CP014060	6864988	Alcaligenaceae
	CP014028	6268754	Alcaligenaceae
	CP014065	6547320	Alcaligenaceae
	CP012046	5876049	Alcaligenaceae
	LS483395	6735421	Alcaligenaceae
	CP003555	4365995	Alcaligenaceae
	CP003915	4740516	Alcaligenaceae
	CP041732	3497628	Alcaligenaceae
	CP032153	4323879	Alcaligenaceae
	CP036294	3922717	Alcaligenaceae
	CP023667	4075263	Alcaligenaceae
	CP033861	4072902	Alcaligenaceae
	CP032521	3866803	Alcaligenaceae
	CP021641	4078346	Alcaligenaceae
	CP048039	4351468	Alcaligenaceae
	CP021079	4047508	Alcaligenaceae
	AM167904	3732255	Alcaligenaceae
	CP025522	3837904	Alcaligenaceae
	CP025521	3785260	Alcaligenaceae
	CP016171	5966919	Alcaligenaceae
	CP016170	5878756	Alcaligenaceae
	AP014582	5191712	Alcaligenaceae
	HE965807	5091817	Alcaligenaceae
	CP018761	5109505	Alcaligenaceae
	CP024175	5303666	Alcaligenaceae
	CP024171	5206932	Alcaligenaceae
	CP020651	5200001	Alcaligenaceae
	CP020819	5200288	Alcaligenaceae
	CP024173	5193581	Alcaligenaceae
	CP020650	5209087	Alcaligenaceae
	CP020649	5204290	Alcaligenaceae
	CP019934	5167199	Alcaligenaceae
	CP020818	5336932	Alcaligenaceae
	CP014013	5339230	Alcaligenaceae
	CP044089	5116077	Alcaligenaceae
	CP025069	5081368	Alcaligenaceae
	CP016431	5077489	Alcaligenaceae
	CP020645	5242373	Alcaligenaceae
	LR134326	5199761	Alcaligenaceae
	LR134480	5207445	Alcaligenaceae
	BX470250	5339179	Alcaligenaceae
	CP016172	5835727	Alcaligenaceae
	CP021111	5380929	Alcaligenaceae
	CP021107	5163295	Alcaligenaceae
	CP021108	6167536	Alcaligenaceae
	CP021110	4497105	Alcaligenaceae
	CP021109	4587366	Alcaligenaceae
	CP021398	4885078	Alcaligenaceae
	CP021400	4811419	Alcaligenaceae
	CP021396	5042960	Alcaligenaceae
	CP021397	4898820	Alcaligenaceae
	CP012076	4912977	Alcaligenaceae
	CP044059	4860452	Alcaligenaceae
	CP012077	4859884	Alcaligenaceae
	CP024172	4859886	Alcaligenaceae
	LR134382	5033537	Alcaligenaceae
	LT906461	4913806	Alcaligenaceae
	CP021395	4809490	Alcaligenaceae
	CP021399	4930681	Alcaligenaceae
	CP007495	3697138	Alcaligenaceae
	CP007494	3699674	Alcaligenaceae
	CP007159	3701221	Alcaligenaceae
	CP007158	3696428	Alcaligenaceae
	CP018890	3680984	Alcaligenaceae
	CP018899	3687853	Alcaligenaceae
	CP018891	3691669	Alcaligenaceae
	CP018892	3699592	Alcaligenaceae
	CP018893	3699930	Alcaligenaceae
	CP018894	3698359	Alcaligenaceae
	CP018895	3695370	Alcaligenaceae
	CP018896	3687739	Alcaligenaceae
	CP020653	3698268	Alcaligenaceae
	CP043176	3699999	Alcaligenaceae
	CP020647	3696624	Alcaligenaceae
	CP043175	3696629	Alcaligenaceae
	CP043174	3696827	Alcaligenaceae
	CP019933	3698889	Alcaligenaceae
	CP043173	3696928	Alcaligenaceae
	CP043172	3698119	Alcaligenaceae
	CP043171	3695230	Alcaligenaceae
	CP043170	3697080	Alcaligenaceae
	CP043169	3696540	Alcaligenaceae
	CP043168	3696516	Alcaligenaceae
	CP043167	3699061	Alcaligenaceae
	CP043166	3697374	Alcaligenaceae
	CP043160	3696773	Alcaligenaceae
	CP043158	3695489	Alcaligenaceae
	CP043157	3695488	Alcaligenaceae
	CP043156	3695479	Alcaligenaceae
	CP043154	3699174	Alcaligenaceae
	CP043153	3694444	Alcaligenaceae
	CP043152	3697619	Alcaligenaceae
	CP043151	3695562	Alcaligenaceae
	CP043150	3697588	Alcaligenaceae
	CP043149	3696565	Alcaligenaceae
	CP043148	3696578	Alcaligenaceae
	CP043147	3696562	Alcaligenaceae
	CP043146	3696575	Alcaligenaceae
	CP043143	3696591	Alcaligenaceae
	CP043141	3696571	Alcaligenaceae
	CP043138	3693564	Alcaligenaceae
	CP043137	3696864	Alcaligenaceae
	CP043136	3696668	Alcaligenaceae
	CP043135	3696560	Alcaligenaceae
	CP043134	3696569	Alcaligenaceae
	CP043133	3693560	Alcaligenaceae
	CP043132	3696559	Alcaligenaceae
	CP043131	3696535	Alcaligenaceae
	CP043130	3695773	Alcaligenaceae
	CP043129	3696747	Alcaligenaceae
	CP043128	3695342	Alcaligenaceae
	CP043127	3697555	Alcaligenaceae
	CP043126	3698052	Alcaligenaceae
	CP043125	3696594	Alcaligenaceae
	CP043124	3696532	Alcaligenaceae
	CP043123	3696547	Alcaligenaceae
	CP016341	3694378	Alcaligenaceae
	CP043122	3696624	Alcaligenaceae
	CP043118	3693267	Alcaligenaceae
	CP043106	3694912	Alcaligenaceae
	CP043101	3696490	Alcaligenaceae
	CP043080	3695202	Alcaligenaceae
	CP043068	3696506	Alcaligenaceae
	CP043066	3696492	Alcaligenaceae
	AP019378	4787082	Alcaligenaceae
	HE965803	4887379	Alcaligenaceae
	CP018897	4773902	Alcaligenaceae
	BX470249	4773551	Alcaligenaceae
	CP025070	4773835	Alcaligenaceae
	CP020655	4773897	Alcaligenaceae
	CP025068	4773899	Alcaligenaceae
	CP025071	4773820	Alcaligenaceae
	CP025072	4775493	Alcaligenaceae
	CP025067	4773897	Alcaligenaceae
	CP020654	4773876	Alcaligenaceae
	CP020652	4773898	Alcaligenaceae
	CP020648	4773977	Alcaligenaceae
	CP019932	4773891	Alcaligenaceae
	CP019931	4773898	Alcaligenaceae
	CP024174	4773857	Alcaligenaceae
	CP043165	4773923	Alcaligenaceae
	CP043164	4773865	Alcaligenaceae
	CP043163	4773913	Alcaligenaceae
	CP043162	4773906	Alcaligenaceae
	CP043161	4773835	Alcaligenaceae
	CP043159	4773905	Alcaligenaceae
	CP043155	4773862	Alcaligenaceae
	CP043145	4773847	Alcaligenaceae
	CP043144	4773919	Alcaligenaceae
	CP043140	4773924	Alcaligenaceae
	CP043139	4773334	Alcaligenaceae
	CP016342	4773708	Alcaligenaceae
	CP043121	4773929	Alcaligenaceae
	CP043120	4773878	Alcaligenaceae
	CP043119	4773867	Alcaligenaceae
	CP043117	4773892	Alcaligenaceae
	CP043116	4773916	Alcaligenaceae
	CP043115	4773985	Alcaligenaceae
	CP043114	4773982	Alcaligenaceae
	CP043113	4773929	Alcaligenaceae
	CP043112	4773923	Alcaligenaceae
	CP020646	4773906	Alcaligenaceae
	CP043111	4773886	Alcaligenaceae
	CP043110	4773807	Alcaligenaceae
	CP043109	4773834	Alcaligenaceae
	CP043108	4773906	Alcaligenaceae
	CP043107	4773916	Alcaligenaceae
	CP043105	4773885	Alcaligenaceae
	CP043104	4773906	Alcaligenaceae
	CP043103	4773912	Alcaligenaceae
	CP043102	4773877	Alcaligenaceae
	CP043099	4773518	Alcaligenaceae
	CP043097	4773925	Alcaligenaceae
	CP043096	4773756	Alcaligenaceae
	CP043095	4773903	Alcaligenaceae
	CP043094	4773927	Alcaligenaceae
	CP043093	4773927	Alcaligenaceae
	CP043092	4773920	Alcaligenaceae
	CP043091	4773951	Alcaligenaceae
	CP043090	4773913	Alcaligenaceae
	CP043089	4773857	Alcaligenaceae
	CP043088	4773909	Alcaligenaceae
	CP043087	4773902	Alcaligenaceae
	CP043086	4773922	Alcaligenaceae
	CP043085	4773925	Alcaligenaceae
	CP043084	4773876	Alcaligenaceae
	CP043083	4773805	Alcaligenaceae
	CP043082	4773920	Alcaligenaceae
	CP043081	4773851	Alcaligenaceae
	CP043079	4773886	Alcaligenaceae
	CP043078	4773926	Alcaligenaceae
	CP043077	4773927	Alcaligenaceae
	CP043076	4773924	Alcaligenaceae
	CP043075	4773877	Alcaligenaceae
	CP043074	4773909	Alcaligenaceae
	CP043073	4773920	Alcaligenaceae
	CP043072	4773877	Alcaligenaceae
	CP043071	4773917	Alcaligenaceae
	CP043070	4773915	Alcaligenaceae
	CP043069	4773916	Alcaligenaceae
	CP043067	4773907	Alcaligenaceae
	CP043064	4773962	Alcaligenaceae
	CP043063	4773959	Alcaligenaceae
	CP043062	4773244	Alcaligenaceae
	CP043061	4773921	Alcaligenaceae
	LS483424	4775387	Alcaligenaceae
	LR590480	4775440	Alcaligenaceae
	LR134329	4774438	Alcaligenaceae
	CP010323	4134593	Alcaligenaceae
	HE965805	4043846	Alcaligenaceae
	CP009751	4102186	Alcaligenaceae
	CP009752	4114630	Alcaligenaceae
	LN849008	4106389	Alcaligenaceae
	LR130529	4108173	Alcaligenaceae
	CP026634	4131102	Alcaligenaceae
	CP033420	4131102	Alcaligenaceae
	CP014153	4100859	Alcaligenaceae
	CP011440	4108472	Alcaligenaceae
	CP011441	4105363	Alcaligenaceae
	CP022361	4314502	Alcaligenaceae
	CP013075	4122649	Alcaligenaceae
	CP016338	4128979	Alcaligenaceae
	CP012128	4134643	Alcaligenaceae
	CP016957	4126037	Alcaligenaceae
	CP013076	4134432	Alcaligenaceae
	CP026465	4133306	Alcaligenaceae
	CP011442	4109988	Alcaligenaceae
	CP011443	4104305	Alcaligenaceae
	CP011444	4106388	Alcaligenaceae
	CP011401	4100705	Alcaligenaceae
	CP011400	4101147	Alcaligenaceae
	CP011445	4110990	Alcaligenaceae
	CP011446	4103254	Alcaligenaceae
	CP011447	4109548	Alcaligenaceae
	CP011448	4111557	Alcaligenaceae
	CP034182	4126211	Alcaligenaceae
	CP034101	4104911	Alcaligenaceae
	CP010963	4133777	Alcaligenaceae
	CP011687	4103277	Alcaligenaceae
	CP013077	4106401	Alcaligenaceae
	CP025347	4105353	Alcaligenaceae
	CP011167	4105364	Alcaligenaceae
	CP013078	4102201	Alcaligenaceae
	CP011688	4103249	Alcaligenaceae
	CP025368	4104277	Alcaligenaceae
	CP013079	4106366	Alcaligenaceae
	CP025345	4100074	Alcaligenaceae
	CP016339	4095467	Alcaligenaceae
	CP016961	4104297	Alcaligenaceae
	CP011168	4100254	Alcaligenaceae
	CP013868	4104403	Alcaligenaceae
	CP011689	4108515	Alcaligenaceae
	CP025530	4285328	Alcaligenaceae
	CP011690	4104176	Alcaligenaceae
	CP025358	4104278	Alcaligenaceae
	CP016959	4107441	Alcaligenaceae
	CP011691	4101167	Alcaligenaceae
	CP011169	4101097	Alcaligenaceae
	CP025526	4145812	Alcaligenaceae
	CP016964	4102255	Alcaligenaceae
	CP016960	4106298	Alcaligenaceae
	CP016963	4103196	Alcaligenaceae
	CP025528	4104044	Alcaligenaceae
	CP011170	4106400	Alcaligenaceae
	CP025355	4106395	Alcaligenaceae
	CP016968	4106392	Alcaligenaceae
	CP011692	4101131	Alcaligenaceae
	CP016967	4101132	Alcaligenaceae
	CP025480	4101146	Alcaligenaceae
	CP025354	4103234	Alcaligenaceae
	CP011171	4104313	Alcaligenaceae
	CP025359	4108487	Alcaligenaceae
	CP025478	4104745	Alcaligenaceae
	CP013080	4103209	Alcaligenaceae
	CP025385	4101116	Alcaligenaceae
	CP025387	4103253	Alcaligenaceae
	CP013869	4104277	Alcaligenaceae
	CP010964	4102978	Alcaligenaceae
	CP011693	4106392	Alcaligenaceae
	CP016958	4110590	Alcaligenaceae
	CP016966	4105336	Alcaligenaceae
	CP011172	4102209	Alcaligenaceae
	CP011173	4101625	Alcaligenaceae
	CP013081	4108490	Alcaligenaceae
	CP011174	4103251	Alcaligenaceae
	CP016962	4103239	Alcaligenaceae
	CP016956	4127835	Alcaligenaceae
	CP011175	4116415	Alcaligenaceae
	CP011176	4102201	Alcaligenaceae
	CP016965	4101245	Alcaligenaceae
	CP011177	4105889	Alcaligenaceae
	CP013870	4101167	Alcaligenaceae
	CP025523	4103262	Alcaligenaceae
	CP025357	4097016	Alcaligenaceae
	CP025342	4104318	Alcaligenaceae
	CP013871	4104234	Alcaligenaceae
	CP011178	4107481	Alcaligenaceae
	CP011179	4103215	Alcaligenaceae
	CP011181	4108495	Alcaligenaceae
	CP013872	4090785	Alcaligenaceae
	CP013873	4105353	Alcaligenaceae
	CP011182	4106406	Alcaligenaceae
	CP025366	4112103	Alcaligenaceae
	CP031788	4108173	Alcaligenaceae
	CP012129	4108471	Alcaligenaceae
	CP013874	4106376	Alcaligenaceae
	CP025388	4110608	Alcaligenaceae
	CP013875	4102202	Alcaligenaceae
	CP013876	4105340	Alcaligenaceae
	CP025356	4105484	Alcaligenaceae
	CP011234	4109545	Alcaligenaceae
	CP010965	4079396	Alcaligenaceae
	CP011694	4110608	Alcaligenaceae
	CP013877	4106382	Alcaligenaceae
	CP013878	4107431	Alcaligenaceae
	CP010838	4107437	Alcaligenaceae
	CP010961	4111050	Alcaligenaceae
	CP010839	4107534	Alcaligenaceae
	CP010840	4105330	Alcaligenaceae
	CP010841	4104286	Alcaligenaceae
	CP013082	4106392	Alcaligenaceae
	CP011695	4105342	Alcaligenaceae
	CP010842	4106364	Alcaligenaceae
	CP011183	4102661	Alcaligenaceae
	CP013879	4108283	Alcaligenaceae
	CP013880	4105291	Alcaligenaceae
	CP025373	4104306	Alcaligenaceae
	CP010843	4103349	Alcaligenaceae
	CP010844	4106490	Alcaligenaceae
	CP010845	4073006	Alcaligenaceae
	CP010846	4106394	Alcaligenaceae
	CP010249	4109554	Alcaligenaceae
	CP011184	4109506	Alcaligenaceae
	CP010847	4107431	Alcaligenaceae
	CP025529	4121896	Alcaligenaceae
	CP010962	4107408	Alcaligenaceae
	CP013881	4105336	Alcaligenaceae
	CP011185	4103696	Alcaligenaceae
	CP012130	4088698	Alcaligenaceae
	CP025371	4088701	Alcaligenaceae
	CP025360	4085512	Alcaligenaceae
	CP011186	4109528	Alcaligenaceae
	CP025349	4107426	Alcaligenaceae
	CP025367	4106930	Alcaligenaceae
	CP012078	4105309	Alcaligenaceae
	CP013083	4104309	Alcaligenaceae
	CP021402	4103125	Alcaligenaceae
	CP025365	4104135	Alcaligenaceae
	CP013084	4104135	Alcaligenaceae
	CP011187	4107439	Alcaligenaceae
	CP013085	4105094	Alcaligenaceae
	CP011188	4107280	Alcaligenaceae
	CP025364	4103241	Alcaligenaceae
	CP011236	4105333	Alcaligenaceae
	CP011189	4108484	Alcaligenaceae
	CP013086	4102201	Alcaligenaceae
	CP011190	4111081	Alcaligenaceae
	CP025346	4104296	Alcaligenaceae
	CP011191	4101757	Alcaligenaceae
	CP011696	4105337	Alcaligenaceae
	CP011697	4110595	Alcaligenaceae
	CP011698	4105334	Alcaligenaceae
	CP011192	4103252	Alcaligenaceae
	CP011699	4104260	Alcaligenaceae
	CP011700	4106385	Alcaligenaceae
	CP013087	4105345	Alcaligenaceae
	CP011701	4111638	Alcaligenaceae
	CP011702	4106491	Alcaligenaceae
	CP025362	4106328	Alcaligenaceae
	CP011703	4106294	Alcaligenaceae
	CP018035	4108455	Alcaligenaceae
	CP011193	4106396	Alcaligenaceae
	CP011704	4108479	Alcaligenaceae
	CP010250	4106823	Alcaligenaceae
	CP011194	4102311	Alcaligenaceae
	CP011195	4103534	Alcaligenaceae
	CP011196	4106384	Alcaligenaceae
	CP025361	4110592	Alcaligenaceae
	CP011197	4106501	Alcaligenaceae
	CP025351	4106497	Alcaligenaceae
	CP025374	4105351	Alcaligenaceae
	CP011235	4103704	Alcaligenaceae
	CP011705	4111642	Alcaligenaceae
	CP011706	4103252	Alcaligenaceae
	CP011707	4103204	Alcaligenaceae
	CP011237	4106500	Alcaligenaceae
	CP012079	4105340	Alcaligenaceae
	CP011708	4109537	Alcaligenaceae
	CP011709	4106500	Alcaligenaceae
	CP011710	4111644	Alcaligenaceae
	CP013882	4105347	Alcaligenaceae
	CP025382	4105345	Alcaligenaceae
	CP011711	4106327	Alcaligenaceae
	CP011712	4109547	Alcaligenaceae
	CP011713	4109547	Alcaligenaceae
	CP025363	4105338	Alcaligenaceae
	CP011714	4110589	Alcaligenaceae
	CP011238	4102182	Alcaligenaceae
	CP011239	4104277	Alcaligenaceae
	CP025352	4106670	Alcaligenaceae
	CP011715	4109549	Alcaligenaceae
	CP033419	4113684	Alcaligenaceae
	CP011240	4106355	Alcaligenaceae
	CP033418	4111610	Alcaligenaceae
	CP011716	4112692	Alcaligenaceae
	CP011717	4110588	Alcaligenaceae
	CP013883	4101532	Alcaligenaceae
	CP018036	4111426	Alcaligenaceae
	CP012080	4102205	Alcaligenaceae
	CP011718	4111608	Alcaligenaceae
	CP011719	4106381	Alcaligenaceae
	CP011241	4106385	Alcaligenaceae
	CP011720	4103237	Alcaligenaceae
	CP025370	4102199	Alcaligenaceae
	CP011721	4103220	Alcaligenaceae
	CP011722	4109544	Alcaligenaceae
	CP011723	4107454	Alcaligenaceae
	CP012131	4107430	Alcaligenaceae
	CP026996	4112703	Alcaligenaceae
	CP012132	4106507	Alcaligenaceae
	CP025379	4100921	Alcaligenaceae
	CP025369	4102613	Alcaligenaceae
	CP011198	4111652	Alcaligenaceae
	CP011199	4104580	Alcaligenaceae
	CP011724	4104251	Alcaligenaceae
	CP012133	4105353	Alcaligenaceae
	CP011725	4104253	Alcaligenaceae
	CP011726	4103217	Alcaligenaceae
	CP011727	4109543	Alcaligenaceae
	CP011728	4110433	Alcaligenaceae
	CP011729	4106397	Alcaligenaceae
	CP011730	4108498	Alcaligenaceae
	CP011731	4107427	Alcaligenaceae
	CP025377	4106368	Alcaligenaceae
	CP011732	4104202	Alcaligenaceae
	CP011255	4111065	Alcaligenaceae
	CP011733	4107435	Alcaligenaceae
	CP012081	4108752	Alcaligenaceae
	CP025372	4106744	Alcaligenaceae
	CP011200	4105954	Alcaligenaceae
	CP011734	4113693	Alcaligenaceae
	CP011735	4104294	Alcaligenaceae
	CP011736	4091930	Alcaligenaceae
	CP011737	4110505	Alcaligenaceae
	CP017882	4108491	Alcaligenaceae
	CP017883	4105355	Alcaligenaceae
	CP011738	4104275	Alcaligenaceae
	CP011201	4108494	Alcaligenaceae
	CP025525	4111618	Alcaligenaceae
	CP025375	4106374	Alcaligenaceae
	CP011739	4109548	Alcaligenaceae
	CP011740	4106406	Alcaligenaceae
	CP025376	4107545	Alcaligenaceae
	CP012134	4107433	Alcaligenaceae
	CP010251	4106401	Alcaligenaceae
	CP010252	4111656	Alcaligenaceae
	CP010253	4111652	Alcaligenaceae
	CP010254	4105331	Alcaligenaceae
	CP010255	4106388	Alcaligenaceae
	CP010256	4107437	Alcaligenaceae
	CP010257	4096713	Alcaligenaceae
	CP010258	4106502	Alcaligenaceae
	CP010259	4105350	Alcaligenaceae
	CP010260	4104288	Alcaligenaceae
	CP010261	4107716	Alcaligenaceae
	CP010262	4106666	Alcaligenaceae
	CP025380	4107721	Alcaligenaceae
	CP011202	4108484	Alcaligenaceae
	CP025386	4105302	Alcaligenaceae
	CP010263	4105348	Alcaligenaceae
	CP010264	4101762	Alcaligenaceae
	CP010265	4103417	Alcaligenaceae
	CP025378	4105345	Alcaligenaceae
	CP025524	4105347	Alcaligenaceae
	CP010266	4107557	Alcaligenaceae
	CP011741	4107398	Alcaligenaceae
	CP011203	4106407	Alcaligenaceae
	CP011742	4105343	Alcaligenaceae
	CP012082	4107480	Alcaligenaceae
	CP012083	4109556	Alcaligenaceae
	CP011204	4110589	Alcaligenaceae
	CP011743	4109174	Alcaligenaceae
	CP011744	4111653	Alcaligenaceae
	CP011745	4110592	Alcaligenaceae
	CP011205	4106397	Alcaligenaceae
	CP025477	4107433	Alcaligenaceae
	CP025479	4101882	Alcaligenaceae
	CP025381	4101872	Alcaligenaceae
	CP011206	4106386	Alcaligenaceae
	CP011207	4112738	Alcaligenaceae
	CP025384	4107408	Alcaligenaceae
	CP025531	4107611	Alcaligenaceae
	CP025350	4108479	Alcaligenaceae
	CP011746	4104353	Alcaligenaceae
	CP011747	4108598	Alcaligenaceae
	CP011748	4107604	Alcaligenaceae
	CP011242	4106497	Alcaligenaceae
	CP012084	4104251	Alcaligenaceae
	CP011749	4111640	Alcaligenaceae
	CP011750	4110591	Alcaligenaceae
	CP010966	4082551	Alcaligenaceae
	CP011243	4109711	Alcaligenaceae
	CP012085	4107382	Alcaligenaceae
	CP011751	4110595	Alcaligenaceae
	CP012086	4105333	Alcaligenaceae
	CP012135	4107409	Alcaligenaceae
	CP011752	4103226	Alcaligenaceae
	CP011208	4103225	Alcaligenaceae
	CP011753	4107558	Alcaligenaceae
	CP011754	4106673	Alcaligenaceae
	CP011244	4106504	Alcaligenaceae
	CP011755	4106503	Alcaligenaceae
	CP025353	4106548	Alcaligenaceae
	CP011756	4109543	Alcaligenaceae
	CP011757	4105288	Alcaligenaceae
	CP012087	4107443	Alcaligenaceae
	CP011758	4107448	Alcaligenaceae
	CP019869	4162596	Alcaligenaceae
	CP016887	4102813	Alcaligenaceae
	CP026998	4107429	Alcaligenaceae
	CP011759	4107434	Alcaligenaceae
	CP011760	4113747	Alcaligenaceae
	CP011761	4112724	Alcaligenaceae
	CP017884	4105450	Alcaligenaceae
	CP011762	4105464	Alcaligenaceae
	CP025344	4108444	Alcaligenaceae
	CP021401	4100915	Alcaligenaceae
	CP017885	4107548	Alcaligenaceae
	CP043237	4148690	Alcaligenaceae
	CP026997	4296902	Alcaligenaceae
	CP011763	4106346	Alcaligenaceae
	CP011764	4106381	Alcaligenaceae
	CP026922	4113725	Alcaligenaceae
	CP013884	4113750	Alcaligenaceae
	CP018037	4103789	Alcaligenaceae
	CP013951	4105309	Alcaligenaceae
	CP013885	4107418	Alcaligenaceae
	CP011765	4107474	Alcaligenaceae
	CP013886	4112678	Alcaligenaceae
	CP011766	4109710	Alcaligenaceae
	CP013887	4107419	Alcaligenaceae
	CP013888	4108480	Alcaligenaceae
	CP013889	4106364	Alcaligenaceae
	CP012088	4106377	Alcaligenaceae
	CP017163	4106326	Alcaligenaceae
	CP017162	4106343	Alcaligenaceae
	CP011767	4106384	Alcaligenaceae
	CP011768	4106397	Alcaligenaceae
	CP026921	4103077	Alcaligenaceae
	CP013890	4109522	Alcaligenaceae
	CP013891	4103084	Alcaligenaceae
	CP013892	4107596	Alcaligenaceae
	CP013893	4107607	Alcaligenaceae
	CP026920	4107579	Alcaligenaceae
	CP026919	4103048	Alcaligenaceae
	CP026918	4087073	Alcaligenaceae
	CP025527	4247121	Alcaligenaceae
	CP017923	4102575	Alcaligenaceae
	CP013894	4105638	Alcaligenaceae
	CP017161	4106441	Alcaligenaceae
	CP013895	4110587	Alcaligenaceae
	CP017123	4106365	Alcaligenaceae
	CP017122	4106367	Alcaligenaceae
	CP013896	4106378	Alcaligenaceae
	CP013897	4107438	Alcaligenaceae
	CP017119	4112627	Alcaligenaceae
	CP013898	4106377	Alcaligenaceae
	CP013899	4102183	Alcaligenaceae
	CP017158	4111636	Alcaligenaceae
	CP012089	4102567	Alcaligenaceae
	CP017166	4105315	Alcaligenaceae
	CP026992	4104386	Alcaligenaceae
	CP017121	4107375	Alcaligenaceae
	CP017924	4106356	Alcaligenaceae
	CP013900	4108659	Alcaligenaceae
	CP013901	4106390	Alcaligenaceae
	CP013088	4107422	Alcaligenaceae
	CP013089	4113730	Alcaligenaceae
	CP025383	4104293	Alcaligenaceae
	CP025343	4106374	Alcaligenaceae
	CP013090	4111645	Alcaligenaceae
	CP013091	4112694	Alcaligenaceae
	CP013092	4105331	Alcaligenaceae
	CP013093	4106379	Alcaligenaceae
	CP032736	4283313	Alcaligenaceae
	CP013094	4107421	Alcaligenaceae
	CP013902	4113756	Alcaligenaceae
	CP011245	4109686	Alcaligenaceae
	CP013095	4103283	Alcaligenaceae
	CP017925	4104273	Alcaligenaceae
	CP026991	4113707	Alcaligenaceae
	CP026990	4106403	Alcaligenaceae
	CP013903	4110604	Alcaligenaceae
	CP018038	4108318	Alcaligenaceae
	CP013904	4108471	Alcaligenaceae
	CP017120	4107500	Alcaligenaceae
	CP013905	4110596	Alcaligenaceae
	CP017165	4106009	Alcaligenaceae
	CP017160	4107128	Alcaligenaceae
	CP017164	4106189	Alcaligenaceae
	CP013096	4106294	Alcaligenaceae
	CP017159	4107365	Alcaligenaceae
	CP017926	4106384	Alcaligenaceae
	CP026917	4104389	Alcaligenaceae
	CP025348	4107445	Alcaligenaceae
	CP026989	4103095	Alcaligenaceae
	CP026988	4109425	Alcaligenaceae
	CP026464	4110576	Alcaligenaceae
	CP026463	4110579	Alcaligenaceae
	CP026462	4110582	Alcaligenaceae
	CP026461	4110577	Alcaligenaceae
	CP026460	4108481	Alcaligenaceae
	CP026459	4110577	Alcaligenaceae
	CP026458	4110576	Alcaligenaceae
	CP026457	4110580	Alcaligenaceae
	CP026456	4110581	Alcaligenaceae
	CP026455	4110584	Alcaligenaceae
	CP026454	4110580	Alcaligenaceae
	CP026453	4110577	Alcaligenaceae
	CP032984	4109667	Alcaligenaceae
	CP026452	4110580	Alcaligenaceae
	CP026451	4110580	Alcaligenaceae
	CP026450	4110583	Alcaligenaceae
	CP026449	4110579	Alcaligenaceae
	CP026448	4110579	Alcaligenaceae
	CP026447	4108457	Alcaligenaceae
	CP026446	4108484	Alcaligenaceae
	CP026445	4110582	Alcaligenaceae
	CP032983	4108382	Alcaligenaceae
	CP026444	4110578	Alcaligenaceae
	CP032982	4110530	Alcaligenaceae
	CP026443	4110548	Alcaligenaceae
	CP026442	4108430	Alcaligenaceae
	CP013906	4108478	Alcaligenaceae
	CP013907	4108658	Alcaligenaceae
	CP018039	4109951	Alcaligenaceae
	CP017927	4105292	Alcaligenaceae
	CP013863	4107428	Alcaligenaceae
	CP013864	4105330	Alcaligenaceae
	CP026987	4108452	Alcaligenaceae
	CP018040	4105872	Alcaligenaceae
	CP013865	4111657	Alcaligenaceae
	CP018041	4103205	Alcaligenaceae
	CP017167	4103236	Alcaligenaceae
	CP017168	4102178	Alcaligenaceae
	CP013866	4103242	Alcaligenaceae
	CP018042	4109385	Alcaligenaceae
	CP032981	4102869	Alcaligenaceae
	CP032980	4107522	Alcaligenaceae
	CP032979	4106594	Alcaligenaceae
	CP032978	4104255	Alcaligenaceae
	CP032735	4274138	Alcaligenaceae
	CP032977	4109520	Alcaligenaceae
	CP032734	4155468	Alcaligenaceae
	CP026441	4106368	Alcaligenaceae
	CP026440	4106376	Alcaligenaceae
	CP026439	4107415	Alcaligenaceae
	CP033417	4107426	Alcaligenaceae
	CP026438	4109535	Alcaligenaceae
	CP026437	4110578	Alcaligenaceae
	CP026436	4107434	Alcaligenaceae
	CP032976	4109524	Alcaligenaceae
	CP033416	4104398	Alcaligenaceae
	CP032975	4108462	Alcaligenaceae
	CP032974	4107601	Alcaligenaceae
	CP032973	4106353	Alcaligenaceae
	CP026435	4106370	Alcaligenaceae
	CP032985	4109519	Alcaligenaceae
	CP032972	4106376	Alcaligenaceae
	CP026434	4107421	Alcaligenaceae
	CP014212	4110595	Alcaligenaceae
	CP026433	4107267	Alcaligenaceae
	CP026432	4110459	Alcaligenaceae
	CP033415	4110579	Alcaligenaceae
	CP026633	4099525	Alcaligenaceae
	CP026431	4113166	Alcaligenaceae
	CP026430	4095487	Alcaligenaceae
	CP013867	4082563	Alcaligenaceae
	CP026429	4110583	Alcaligenaceae
	CP026472	4108483	Alcaligenaceae
	CP026632	4110592	Alcaligenaceae
	CP026669	4103232	Alcaligenaceae
	CP026471	4107544	Alcaligenaceae
	CP026668	4105473	Alcaligenaceae
	CP026667	4110597	Alcaligenaceae
	CP026631	4111643	Alcaligenaceae
	CP026666	4106495	Alcaligenaceae
	CP026470	4107552	Alcaligenaceae
	CP014211	4106512	Alcaligenaceae
	CP026630	4106635	Alcaligenaceae
	CP026665	4106636	Alcaligenaceae
	CP032971	4107424	Alcaligenaceae
	CP025073	4110543	Alcaligenaceae
	CP026629	4106400	Alcaligenaceae
	CP032970	4106382	Alcaligenaceae
	CP026664	4106379	Alcaligenaceae
	CP026469	4107431	Alcaligenaceae
	CP026468	4107431	Alcaligenaceae
	CP026428	4106382	Alcaligenaceae
	CP032969	4101972	Alcaligenaceae
	CP032968	4113747	Alcaligenaceae
	CP026467	4113744	Alcaligenaceae
	CP026466	4107550	Alcaligenaceae
	CP032967	4107542	Alcaligenaceae
	CP032966	4111624	Alcaligenaceae
	CP032965	4108480	Alcaligenaceae
	CP032964	4112708	Alcaligenaceae
	CP032963	4107436	Alcaligenaceae
	CP032962	4107376	Alcaligenaceae
	CP033414	4107427	Alcaligenaceae
	CP032961	4108425	Alcaligenaceae
	CP032960	4108431	Alcaligenaceae
	CP026628	4109501	Alcaligenaceae
	CP033413	4106650	Alcaligenaceae
	CP032959	4104279	Alcaligenaceae
	CP032958	4107407	Alcaligenaceae
	CP032957	4103242	Alcaligenaceae
	CP033412	4107430	Alcaligenaceae
	CP032956	4105192	Alcaligenaceae
	CP032955	4108480	Alcaligenaceae
	CP017402	4128984	Alcaligenaceae
	CP017403	4140370	Alcaligenaceae
	CP017404	4257407	Alcaligenaceae
	CP017405	4386396	Alcaligenaceae
	CP033411	4106387	Alcaligenaceae
	CP032954	4110582	Alcaligenaceae
	CP032953	4103510	Alcaligenaceae
	CP032952	4107429	Alcaligenaceae
	CP032951	4106383	Alcaligenaceae
	CP032950	4107731	Alcaligenaceae
	CP032949	4106673	Alcaligenaceae
	CP032948	4106675	Alcaligenaceae
	CP032947	4106674	Alcaligenaceae
	CP032946	4107727	Alcaligenaceae
	CP032945	4106670	Alcaligenaceae
	CP032944	4107724	Alcaligenaceae
	CP021403	4114583	Alcaligenaceae
	CP032733	4114650	Alcaligenaceae
	CP032732	4107450	Alcaligenaceae
	CP032731	4114616	Alcaligenaceae
	CP032730	4114643	Alcaligenaceae
	CP032729	4115686	Alcaligenaceae
	CP032728	4107493	Alcaligenaceae
	CP032727	4103260	Alcaligenaceae
	CP032726	4104278	Alcaligenaceae
	CP032725	4109705	Alcaligenaceae
	CP026627	4106373	Alcaligenaceae
	CP026626	4108503	Alcaligenaceae
	CP026625	4107246	Alcaligenaceae
	CP026624	4107260	Alcaligenaceae
	CP026663	4105346	Alcaligenaceae
	CP026623	4105308	Alcaligenaceae
	CP026622	4104297	Alcaligenaceae
	CP026621	4105348	Alcaligenaceae
	CP026916	4106441	Alcaligenaceae
	CP026915	4106572	Alcaligenaceae
	CP026914	4106621	Alcaligenaceae
	CP026913	4106638	Alcaligenaceae
	CP026912	4106349	Alcaligenaceae
	CP026911	4106373	Alcaligenaceae
	CP026910	4106460	Alcaligenaceae
	CP026909	4105313	Alcaligenaceae
	CP032737	4105341	Alcaligenaceae
	CP032724	4107705	Alcaligenaceae
	CP032723	4106387	Alcaligenaceae
	CP032722	4109699	Alcaligenaceae
	CP032721	4110563	Alcaligenaceae
	CP032720	4106376	Alcaligenaceae
	CP032719	4109503	Alcaligenaceae
	CP026908	4112699	Alcaligenaceae
	CP026907	4111650	Alcaligenaceae
	CP026906	4112682	Alcaligenaceae
	CP026905	4112660	Alcaligenaceae
	CP032718	4114767	Alcaligenaceae
	CP032717	4110569	Alcaligenaceae
	CP032716	4113726	Alcaligenaceae
	CP032715	4113725	Alcaligenaceae
	CP026904	4104254	Alcaligenaceae
	CP026903	4104267	Alcaligenaceae
	CP026902	4104279	Alcaligenaceae
	CP032714	4103204	Alcaligenaceae
	CP032713	4108569	Alcaligenaceae
	CP032712	4109601	Alcaligenaceae
	CP032711	4106490	Alcaligenaceae
	CP032710	4107428	Alcaligenaceae
	CP022362	4110338	Alcaligenaceae
	CP026901	4107705	Alcaligenaceae
	CP032709	4103226	Alcaligenaceae
	CP026620	4107723	Alcaligenaceae
	CP032708	4106671	Alcaligenaceae
	CP026619	4107707	Alcaligenaceae
	CP026900	4108772	Alcaligenaceae
	CP026899	4104253	Alcaligenaceae
	CP026898	4108749	Alcaligenaceae
	CP033410	4102159	Alcaligenaceae
	CP026618	4107704	Alcaligenaceae
	CP026897	4110580	Alcaligenaceae
	CP026896	4110583	Alcaligenaceae
	CP026895	4110562	Alcaligenaceae
	CP026894	4110594	Alcaligenaceae
	CP026893	4106343	Alcaligenaceae
	CP026892	4105314	Alcaligenaceae
	CP026891	4105328	Alcaligenaceae
	CP026890	4105332	Alcaligenaceae
	CP026889	4105318	Alcaligenaceae
	CP026888	4105341	Alcaligenaceae
	CP026887	4108309	Alcaligenaceae
	CP026886	4107367	Alcaligenaceae
	CP026885	4107132	Alcaligenaceae
	CP026884	4107386	Alcaligenaceae
	CP033409	4107362	Alcaligenaceae
	CP026883	4105107	Alcaligenaceae
	CP026882	4105128	Alcaligenaceae
	CP032787	4105112	Alcaligenaceae
	CP032786	4105103	Alcaligenaceae
	CP032785	4105082	Alcaligenaceae
	CP032784	4103246	Alcaligenaceae
	CP032783	4107409	Alcaligenaceae
	CP032782	4105314	Alcaligenaceae
	CP032781	4105289	Alcaligenaceae
	CP032780	4105313	Alcaligenaceae
	CP032779	4105330	Alcaligenaceae
	CP032778	4105303	Alcaligenaceae
	CP032777	4105310	Alcaligenaceae
	CP032776	4105352	Alcaligenaceae
	CP032775	4105270	Alcaligenaceae
	CP032774	4104307	Alcaligenaceae
	CP032773	4104300	Alcaligenaceae
	CP032772	4108475	Alcaligenaceae
	CP032771	4108481	Alcaligenaceae
	CP032770	4108481	Alcaligenaceae
	CP032769	4108469	Alcaligenaceae
	CP032768	4108476	Alcaligenaceae
	CP033309	4106386	Alcaligenaceae
	CP032767	4106379	Alcaligenaceae
	CP032766	4106389	Alcaligenaceae
	CP032765	4108442	Alcaligenaceae
	CP032764	4108419	Alcaligenaceae
	CP032763	4108394	Alcaligenaceae
	CP033308	4107394	Alcaligenaceae
	CP033307	4107422	Alcaligenaceae
	CP033306	4107425	Alcaligenaceae
	CP033305	4107418	Alcaligenaceae
	CP033304	4106377	Alcaligenaceae
	CP033303	4104246	Alcaligenaceae
	CP033302	4104248	Alcaligenaceae
	CP033301	4104252	Alcaligenaceae
	CP033300	4106377	Alcaligenaceae
	CP033299	4100123	Alcaligenaceae
	CP033298	4100125	Alcaligenaceae
	CP033297	4100121	Alcaligenaceae
	CP033296	4100121	Alcaligenaceae
	CP033295	4104343	Alcaligenaceae
	CP043236	4104329	Alcaligenaceae
	CP033294	4104340	Alcaligenaceae
	CP043235	4104341	Alcaligenaceae
	CP033293	4107383	Alcaligenaceae
	CP033292	4106331	Alcaligenaceae
	CP033291	4107419	Alcaligenaceae
	CP033290	4108417	Alcaligenaceae
	CP033289	4108425	Alcaligenaceae
	CP033288	4108423	Alcaligenaceae
	CP033287	4108415	Alcaligenaceae
	CP033286	4108498	Alcaligenaceae
	CP033285	4108513	Alcaligenaceae
	CP033284	4108501	Alcaligenaceae
	CP033283	4111618	Alcaligenaceae
	CP033282	4111614	Alcaligenaceae
	CP033408	4104272	Alcaligenaceae
	CP033281	4104067	Alcaligenaceae
	CP033280	4103215	Alcaligenaceae
	CP033279	4105456	Alcaligenaceae
	CP033278	4101160	Alcaligenaceae
	CP033277	4101171	Alcaligenaceae
	CP033276	4101169	Alcaligenaceae
	CP033275	4108586	Alcaligenaceae
	CP033274	4108592	Alcaligenaceae
	CP033273	4108590	Alcaligenaceae
	CP033272	4108587	Alcaligenaceae
	CP033271	4105452	Alcaligenaceae
	CP033270	4105457	Alcaligenaceae
	CP033269	4105455	Alcaligenaceae
	CP033268	4105456	Alcaligenaceae
	CP033267	4105456	Alcaligenaceae
	CP033266	4105455	Alcaligenaceae
	CP033265	4104089	Alcaligenaceae
	CP033264	4104246	Alcaligenaceae
	CP033407	4104259	Alcaligenaceae
	CP033406	4104253	Alcaligenaceae
	CP033263	4104244	Alcaligenaceae
	CP033262	4108452	Alcaligenaceae
	CP033261	4108443	Alcaligenaceae
	CP033260	4108429	Alcaligenaceae
	CP033259	4108465	Alcaligenaceae
	CP033258	4110560	Alcaligenaceae
	LS483398	4133344	Alcaligenaceae
	LR590467	4102960	Alcaligenaceae
	LT906471	4108502	Alcaligenaceae
	LT906484	4122636	Alcaligenaceae
	CP038790	4126010	Alcaligenaceae
	CP019957	4105522	Alcaligenaceae
	CP031787	4102412	Alcaligenaceae
	BX470248	4086189	Alcaligenaceae
	CP031289	4107923	Alcaligenaceae
	CP031112	4108026	Alcaligenaceae
	CP031113	4108152	Alcaligenaceae
	CP031114	4112629	Alcaligenaceae
	CP015766	4120993	Alcaligenaceae
	CP015767	4147141	Alcaligenaceae
	CP015761	4127222	Alcaligenaceae
	CP015759	4115166	Alcaligenaceae
	CP015764	4128711	Alcaligenaceae
	CP015763	4123407	Alcaligenaceae
	CP015768	4115775	Alcaligenaceae
	CP015771	4124767	Alcaligenaceae
	LS398589	4144451	Alcaligenaceae
	LS398604	4160618	Alcaligenaceae
	LS398590	4160081	Alcaligenaceae
	LS398605	4162738	Alcaligenaceae
	LS398588	4137378	Alcaligenaceae
	AM902716	5287950	Alcaligenaceae
	CP016440	4490371	Alcaligenaceae
	CP012334	5532470	Alcaligenaceae
	CP028901	4227194	Alcaligenaceae
	CP021250	3925525	Alcaligenaceae
	CP018898	4321461	Alcaligenaceae
	CP016340	4476250	Alcaligenaceae
	LT546645	4480141	Alcaligenaceae
	CP002663	3883605	Alcaligenaceae
	CP022987	3548703	Alcaligenaceae
	CP003264	1732123	Alcaligenaceae
	CP002456	1695860	Alcaligenaceae
	CP021201	1635330	Alcaligenaceae
	CP021200	1739054	Alcaligenaceae
	CP021199	1649945	Alcaligenaceae
	CP021060	1666291	Alcaligenaceae
	CP021246	1692042	Alcaligenaceae
	LR134346	1732243	Alcaligenaceae
	AM286690	3120143	Alcanivoracaceae
	CP003466	4928223	Alcanivoracaceae
	CP012331	4733951	Alcanivoracaceae
	CP014322	4649146	Alteromonadaceae
	CP010912	4457472	Alteromonadaceae
	CP008849	4308833	Alteromonadaceae
	CP003841	4653851	Alteromonadaceae
	CP003873	4629479	Alteromonadaceae
	CP003845	4480507	Alteromonadaceae
	CP003844	4601785	Alteromonadaceae
	CP014323	4575623	Alteromonadaceae
	CP018321	4630082	Alteromonadaceae
	CP003917	4643844	Alteromonadaceae
	CP046670	4512541	Alteromonadaceae
	CP018026	4344439	Alteromonadaceae
	CP018024	4324292	Alteromonadaceae
	CP018027	4361254	Alteromonadaceae
	CP041169	4343683	Alteromonadaceae
	CP041170	4294985	Alteromonadaceae
	CP018029	4349864	Alteromonadaceae
	CP013930	4618068	Alteromonadaceae
	CP013928	4597489	Alteromonadaceae
	CP004853	4628378	Alteromonadaceae
	CP002339	4972148	Alteromonadaceae
	LR136958	4731105	Alteromonadaceae
	CP031967	4458618	Alteromonadaceae
	AP021859	5113645	Alteromonadaceae
	CP013932	4696291	Alteromonadaceae
	CP013933	4666357	Alteromonadaceae
	CP025115	4360928	Alteromonadaceae
	CP031010	4934803	Alteromonadaceae
	CP018031	4143824	Alteromonadaceae
	CP013120	4686200	Alteromonadaceae
	CP013926	4652019	Alteromonadaceae
	CP015345	4755740	Alteromonadaceae
	CP015346	4721861	Alteromonadaceae
	CP041660	4108962	Alteromonadaceae
	CP041661	759041	Alteromonadaceae
	CP026604	5663044	Alteromonadaceae
	CP003060	4134229	Alteromonadaceae
	CP002526	5052309	Alteromonadaceae
	CP034120	4606342	Alteromonadaceae
	CP001978	4421911	Alteromonadaceae
	FO203363	3989480	Alteromonadaceae
	CP000514	4326849	Alteromonadaceae
	CP011494	3998597	Alteromonadaceae
	CP021333	4304603	Alteromonadaceae
	CP007152	4616532	Alteromonadaceae
	CP020931	4386892	Alteromonadaceae
	CP017715	4121005	Alteromonadaceae
	CP007151	3975896	Alteromonadaceae
	CP031848	4300456	Alteromonadaceae
	CP003735	4063864	Alteromonadaceae
	CP011929	4768422	Alteromonadaceae
	CP043042	4543926	Alteromonadaceae
	CP037934	3684730	Alteromonadaceae
	CP014754	4435564	Alteromonadaceae
	CP034142	4473318	Alteromonadaceae
	CP045324	4264018	Alteromonadaceae
	CP045367	4256935	Alteromonadaceae
	CP047656	4948461	Alteromonadaceae
	CP003837	5413691	Alteromonadaceae
	CP036536	4123530	Alteromonadaceae
	CP031769	4440293	Alteromonadaceae
	CP039852	3811475	Alteromonadaceae
	CP001359	5029329	Anaeromyxobacteraceae
	CP000251	5013479	Anaeromyxobacteraceae
	CP000769	5277990	Anaeromyxobacteraceae
	CP001131	5061632	Anaeromyxobacteraceae
	CP001759	1206806	Anaplasmataceae
	CP001079	1202435	Anaplasmataceae
	CP000030	1197687	Anaplasmataceae
	CP015994	1214674	Anaplasmataceae
	CP000235	1471282	Anaplasmataceae
	CP006616	1477581	Anaplasmataceae
	CP006617	1481598	Anaplasmataceae
	CP015376	1545197	Anaplasmataceae
	CP000107	1315030	Anaplasmataceae
	CP025749	1314789	Anaplasmataceae
	CP000236	1176248	Anaplasmataceae
	CP007473	1172721	Anaplasmataceae
	CP007475	1176890	Anaplasmataceae
	CP007476	1176202	Anaplasmataceae
	CP007477	1175197	Anaplasmataceae
	CP007478	1173884	Anaplasmataceae
	CP007479	1174357	Anaplasmataceae
	CP007480	1170935	Anaplasmataceae
	CP006917	1196717	Anaplasmataceae
	CR925677	1499920	Anaplasmataceae
	CR925678	1512977	Anaplasmataceae
	CR767821	1516355	Anaplasmataceae
	CP007474	1148904	Anaplasmataceae
	CP007481	884232	Anaplasmataceae
	CP001431	879977	Anaplasmataceae
	CP000237	859006	Anaplasmataceae
	CP034333	1080064	Anaplasmataceae
	CP041215	1449344	Anaplasmataceae
	CP021120	1376868	Anaplasmataceae
	AP013028	1250060	Anaplasmataceae
	CP042904	1401460	Anaplasmataceae
	CP034334	1273527	Anaplasmataceae
	CP034335	1273530	Anaplasmataceae
	AE017196	1267782	Anaplasmataceae
	LK055284	1268461	Anaplasmataceae
	CP003884	1295804	Anaplasmataceae
	CP003883	1301823	Anaplasmataceae
	CP015510	1801626	Anaplasmataceae
	HE660029	957990	Anaplasmataceae
	HG810405	960618	Anaplasmataceae
	AE017321	1080084	Anaplasmataceae
	CP041923	1482279	Anaplasmataceae
	CP041924	1483853	Anaplasmataceae
	CP037426	1352354	Anaplasmataceae
	CP042444	1269137	Anaplasmataceae
	CP042446	1267781	Anaplasmataceae
	CP042445	1267436	Anaplasmataceae
	CP031221	1484007	Anaplasmataceae
	CP001391	1445873	Anaplasmataceae
	CP001291	5942652	Aphanothecaceae
	CP002198	6091620	Aphanothecaceae
	CP042326	3326959	Aphanothecaceae
	CP002726	1552775	Aquificaceae
	CP004347	1552931	Aquificaceae
	CP002809	1552607	Aquificaceae
	CP004390	1552931	Aquificaceae
	CP001130	1559514	Aquificaceae
	AP018530	2100540	Atopobiaceae
	LT635455	2176737	Atopobiaceae
	CP012069	3213585	Atopobiaceae
	CP002106	2051896	Atopobiaceae
	CP006367	3742793	Aurantimonadaceae
	CP020330	4671477	Aurantimonadaceae
	CP014275	4554702	Aurantimonadaceae
	CP025074	3457580	Bacillaceae
	CP030063	5475560	Bacillaceae
	CP015438	2834744	Bacillaceae
	CP021838	2805288	Bacillaceae
	CP020815	2812123	Bacillaceae
	CP000922	2846746	Bacillaceae
	CP012152	2803668	Bacillaceae
	CP015435	3819480	Bacillaceae
	CP015436	3814080	Bacillaceae
	CP026008	3829464	Bacillaceae
	CP040344	5298275	Bacillaceae
	CP034548	4939577	Bacillaceae
	CP043559	3867833	Bacillaceae
	CP009108	3674849	Bacillaceae
	CP040747	3701797	Bacillaceae
	CP024204	3765752	Bacillaceae
	CP022319	3812575	Bacillaceae
	CP011150	3745123	Bacillaceae
	CP006845	3916828	Bacillaceae
	FN597644	3980199	Bacillaceae
	CP006952	3942754	Bacillaceae
	CP002634	3995227	Bacillaceae
	CP029069	4041665	Bacillaceae
	CP029070	4046611	Bacillaceae
	CP029071	3982905	Bacillaceae
	CP035899	4018867	Bacillaceae
	CP014783	4006754	Bacillaceae
	CP031424	3919798	Bacillaceae
	CP041770	3993985	Bacillaceae
	CP038028	4240930	Bacillaceae
	CP041693	3954391	Bacillaceae
	CP018902	4002836	Bacillaceae
	CP044444	4118763	Bacillaceae
	CP018152	3989393	Bacillaceae
	CP013727	3966922	Bacillaceae
	CP011252	3897521	Bacillaceae
	CP043416	3934563	Bacillaceae
	CP016913	3688209	Bacillaceae
	CP014700	3927922	Bacillaceae
	CP030097	4042190	Bacillaceae
	CP021505	4070574	Bacillaceae
	CP044359	3907893	Bacillaceae
	CP018200	3929787	Bacillaceae
	CP040672	3952640	Bacillaceae
	CP017953	3957164	Bacillaceae
	CP032146	4009619	Bacillaceae
	CP041691	4064151	Bacillaceae
	CP007242	3953361	Bacillaceae
	CP000560	3918596	Bacillaceae
	HG328253	4071167	Bacillaceae
	HF563562	3910324	Bacillaceae
	HG328254	3889532	Bacillaceae
	CP002627	3937511	Bacillaceae
	CP006960	4005145	Bacillaceae
	CP006058	4034636	Bacillaceae
	CP002927	3939203	Bacillaceae
	CP003332	4238624	Bacillaceae
	AP018443	5219278	Bacillaceae
	AP014833	5228065	Bacillaceae
	AP019731	5209717	Bacillaceae
	CP001598	5227419	Bacillaceae
	CP001970	5228842	Bacillaceae
	CP001974	5228828	Bacillaceae
	AE017334	5227419	Bacillaceae
	AE016879	5227293	Bacillaceae
	CP047131	5213532	Bacillaceae
	CP001215	5230115	Bacillaceae
	CP002091	5218947	Bacillaceae
	AE017225	5228663	Bacillaceae
	CP006742	5210966	Bacillaceae
	CP009598	5228687	Bacillaceae
	CP007666	5229469	Bacillaceae
	CP023001	5245242	Bacillaceae
	CP007618	5236981	Bacillaceae
	CP009902	5321900	Bacillaceae
	CP010852	5200257	Bacillaceae
	CP009981	5227467	Bacillaceae
	CP009544	5214671	Bacillaceae
	CP009700	5210596	Bacillaceae
	CP010322	5229224	Bacillaceae
	CP008853	5227170	Bacillaceae
	CP022044	5228806	Bacillaceae
	CP047097	5225746	Bacillaceae
	CP047099	5227419	Bacillaceae
	CP047098	5227419	Bacillaceae
	CP047111	5227450	Bacillaceae
	CP047107	5227452	Bacillaceae
	CP047104	5227454	Bacillaceae
	CP008854	5225433	Bacillaceae
	CP008846	5213498	Bacillaceae
	CP009331	5228730	Bacillaceae
	CP029805	5228599	Bacillaceae
	CP031643	5291783	Bacillaceae
	CP031642	5231857	Bacillaceae
	CP009341	5222171	Bacillaceae
	CP009325	5221627	Bacillaceae
	CP012730	5228660	Bacillaceae
	CP012729	5227092	Bacillaceae
	CP012720	5228656	Bacillaceae
	CP012721	5228657	Bacillaceae
	CP012722	5228658	Bacillaceae
	CP012723	5228656	Bacillaceae
	CP012724	5227094	Bacillaceae
	CP012725	5227091	Bacillaceae
	CP012726	5227060	Bacillaceae
	CP012727	5227090	Bacillaceae
	CP012728	5227079	Bacillaceae
	CP009697	5213209	Bacillaceae
	CP009464	5230088	Bacillaceae
	CP019588	5228667	Bacillaceae
	CP018903	5227565	Bacillaceae
	CP009328	5229969	Bacillaceae
	CP024035	5035815	Bacillaceae
	CP041519	5154607	Bacillaceae
	CP026095	4826182	Bacillaceae
	CP002207	4168266	Bacillaceae
	CP022653	4325818	Bacillaceae
	CP021500	4180819	Bacillaceae
	CP012502	3582268	Bacillaceae
	CP007512	5295783	Bacillaceae
	CP030926	5568346	Bacillaceae
	CP018574	3733835	Bacillaceae
	CP012329	3793419	Bacillaceae
	CP012330	3792999	Bacillaceae
	CP012482	3787818	Bacillaceae
	CP002394	4681672	Bacillaceae
	CP001407	5269628	Bacillaceae
	CP009318	5268427	Bacillaceae
	CP009641	5342933	Bacillaceae
	CP001177	5269030	Bacillaceae
	CP034551	5416249	Bacillaceae
	AE016877	5411809	Bacillaceae
	CP009628	5269496	Bacillaceae
	CP001176	5419036	Bacillaceae
	CP001746	5196054	Bacillaceae
	CP022445	5312355	Bacillaceae
	CP009300	5379685	Bacillaceae
	CP000001	5300915	Bacillaceae
	CP009968	5305318	Bacillaceae
	CP003187	5222906	Bacillaceae
	CP003747	5083176	Bacillaceae
	CP009590	5267792	Bacillaceae
	CP001186	5387334	Bacillaceae
	AP007209	5221581	Bacillaceae
	CP000227	5214195	Bacillaceae
	CP009941	5457398	Bacillaceae
	CP028516	5330209	Bacillaceae
	CP009596	5270991	Bacillaceae
	CP015727	5352307	Bacillaceae
	CP023179	5279524	Bacillaceae
	CP011153	5506876	Bacillaceae
	CP011151	5521782	Bacillaceae
	CP016315	5369104	Bacillaceae
	CP040334	5389366	Bacillaceae
	CP040340	5542157	Bacillaceae
	CP040342	5291741	Bacillaceae
	CP009369	5295158	Bacillaceae
	CP009686	5349617	Bacillaceae
	CP011145	5418913	Bacillaceae
	CP012691	5430118	Bacillaceae
	CP017060	5365433	Bacillaceae
	CP017234	5358595	Bacillaceae
	CP029468	5340498	Bacillaceae
	CP014486	5331694	Bacillaceae
	CP029454	5271204	Bacillaceae
	CP020383	5361178	Bacillaceae
	CP008712	5223665	Bacillaceae
	CP042929	5544716	Bacillaceae
	CP023245	5482892	Bacillaceae
	CP011155	5404176	Bacillaceae
	CP018931	5242668	Bacillaceae
	CP018933	5243376	Bacillaceae
	CP018935	5229506	Bacillaceae
	CP046511	5323903	Bacillaceae
	CP016595	5329684	Bacillaceae
	CP016360	5498820	Bacillaceae
	CP016316	5218997	Bacillaceae
	CP039269	5247580	Bacillaceae
	CP024655	5561815	Bacillaceae
	CP009605	5271178	Bacillaceae
	CP045606	5461537	Bacillaceae
	CP026678	5417196	Bacillaceae
	CP030982	5466652	Bacillaceae
	CP041305	5207802	Bacillaceae
	CP026031	5175203	Bacillaceae
	CP026033	5274417	Bacillaceae
	AP006627	4303871	Bacillaceae
	CP019985	4517459	Bacillaceae
	CP012475	4264866	Bacillaceae
	CP003056	3552226	Bacillaceae
	CP009709	3366995	Bacillaceae
	CP025437	3642571	Bacillaceae
	CP017888	3599077	Bacillaceae
	CP033687	3628651	Bacillaceae
	CP010525	3624641	Bacillaceae
	CP035305	3664215	Bacillaceae
	CP026649	3602752	Bacillaceae
	CP011939	3694837	Bacillaceae
	CP018866	4899141	Bacillaceae
	CP000764	4087024	Bacillaceae
	CP024120	4147576	Bacillaceae
	CP024109	4082665	Bacillaceae
	CP024107	4220037	Bacillaceae
	CP024116	4252735	Bacillaceae
	CP024104	4196763	Bacillaceae
	CP024101	4225378	Bacillaceae
	CP024113	4245145	Bacillaceae
	CP024098	4215994	Bacillaceae
	CP024096	4252957	Bacillaceae
	CP024111	4220037	Bacillaceae
	CP011974	4865574	Bacillaceae
	CP040367	3892082	Bacillaceae
	CP016790	3960308	Bacillaceae
	CP033044	5426180	Bacillaceae
	LR134328	4368765	Bacillaceae
	CP017070	4100094	Bacillaceae
	LT603683	4607442	Bacillaceae
	CP023481	4659467	Bacillaceae
	CP035232	4744953	Bacillaceae
	BA000004	4202352	Bacillaceae
	CP040441	4315604	Bacillaceae
	CP041357	4144458	Bacillaceae
	CP029364	4154245	Bacillaceae
	CP020880	4277585	Bacillaceae
	CP006643	4884713	Bacillaceae
	CP011051	4031727	Bacillaceae
	CP022983	4557232	Bacillaceae
	CP020814	4610863	Bacillaceae
	CP003923	3993073	Bacillaceae
	LS483476	4384366	Bacillaceae
	CP000002	4222597	Bacillaceae
	AE017333	4222645	Bacillaceae
	LR698983	4208157	Bacillaceae
	CP031126	4405373	Bacillaceae
	CP034569	4239205	Bacillaceae
	CP023729	4260287	Bacillaceae
	CP022477	4287720	Bacillaceae
	CP017247	4422181	Bacillaceae
	CP021970	4208157	Bacillaceae
	CP041154	4280457	Bacillaceae
	CP014781	4252398	Bacillaceae
	CP042252	4201713	Bacillaceae
	CP038186	4230480	Bacillaceae
	CP032538	4440765	Bacillaceae
	LR134392	4226784	Bacillaceae
	LR134165	4430306	Bacillaceae
	CP045814	4343379	Bacillaceae
	CP025226	4193958	Bacillaceae
	CP014794	4405338	Bacillaceae
	CP014842	4136986	Bacillaceae
	CP014793	4475542	Bacillaceae
	CP014795	4300706	Bacillaceae
	CP021677	4326347	Bacillaceae
	CP021669	4544416	Bacillaceae
	CP035228	4420863	Bacillaceae
	CP035404	4419047	Bacillaceae
	CP035405	4298206	Bacillaceae
	CP035188	4231149	Bacillaceae
	CP027789	4367367	Bacillaceae
	CP033218	4341076	Bacillaceae
	CP033043	5230624	Bacillaceae
	CP040336	5202942	Bacillaceae
	CP047095	4411234	Bacillaceae
	CP033051	4591517	Bacillaceae
	CP001982	5097447	Bacillaceae
	CP035094	5343009	Bacillaceae
	CP009920	5343114	Bacillaceae
	CP032527	5193616	Bacillaceae
	CP001983	5097129	Bacillaceae
	CP047699	5171845	Bacillaceae
	CP023317	5027195	Bacillaceae
	CP044286	4998309	Bacillaceae
	CP044290	5096752	Bacillaceae
	CP044287	5006028	Bacillaceae
	CP044288	5072039	Bacillaceae
	CP044289	5113867	Bacillaceae
	CP018874	5066463	Bacillaceae
	CP041066	5154879	Bacillaceae
	CP010586	5153539	Bacillaceae
	CP022674	5449951	Bacillaceae
	CP026736	5129603	Bacillaceae
	CP022572	5839313	Bacillaceae
	LN999829	3854619	Bacillaceae
	CP031443	5468285	Bacillaceae
	CP009692	5255868	Bacillaceae
	CP031071	5369163	Bacillaceae
	CP020743	5597907	Bacillaceae
	CP037992	5306036	Bacillaceae
	CP015506	5461741	Bacillaceae
	CP041979	5126903	Bacillaceae
	CP005965	4376305	Bacillaceae
	CP023168	4535069	Bacillaceae
	CP043501	4541365	Bacillaceae
	CP023666	4464381	Bacillaceae
	CP023665	4376831	Bacillaceae
	CP010524	4388022	Bacillaceae
	CP033389	4476034	Bacillaceae
	CP033198	4450636	Bacillaceae
	CP020352	4352468	Bacillaceae
	CP047085	5248370	Bacillaceae
	CP045777	5351395	Bacillaceae
	CP041750	5017580	Bacillaceae
	CP041981	5208566	Bacillaceae
	CP040515	5319903	Bacillaceae
	CP001878	3858997	Bacillaceae
	CP007626	5228024	Bacillaceae
	AP014928	3723433	Bacillaceae
	CP000813	3704641	Bacillaceae
	CP027116	3937399	Bacillaceae
	CP027034	3747740	Bacillaceae
	CP040514	3880448	Bacillaceae
	LT906438	3855667	Bacillaceae
	CP016784	3698973	Bacillaceae
	CP010997	3860091	Bacillaceae
	CP011007	3787586	Bacillaceae
	CP029464	3640542	Bacillaceae
	AP021906	3794970	Bacillaceae
	CP018100	3740842	Bacillaceae
	CP018197	3935874	Bacillaceae
	CP043404	3786744	Bacillaceae
	CP015607	4070488	Bacillaceae
	CP015611	3741804	Bacillaceae
	CP015610	3735181	Bacillaceae
	CP025001	4268316	Bacillaceae
	CP017704	5645783	Bacillaceae
	CP011008	5345500	Bacillaceae
	CP012024	3368778	Bacillaceae
	CP021920	4832293	Bacillaceae
	CP005586	4815602	Bacillaceae
	CP022874	4166290	Bacillaceae
	CP019626	4045581	Bacillaceae
	CP046398	5286434	Bacillaceae
	CP017016	5141367	Bacillaceae
	CP047644	4203926	Bacillaceae
	CP031062	5241257	Bacillaceae
	CP034686	5283933	Bacillaceae
	CP009938	4069641	Bacillaceae
	LN680001	4233615	Bacillaceae
	CP043830	5200216	Bacillaceae
	CP030937	4238631	Bacillaceae
	CP046266	5602542	Bacillaceae
	CP026607	5415320	Bacillaceae
	CP020437	5287334	Bacillaceae
	CP033795	5277296	Bacillaceae
	CP017072	4109356	Bacillaceae
	CP042593	4916069	Bacillaceae
	CP018249	4162101	Bacillaceae
	CP025122	5230501	Bacillaceae
	CP015226	5036631	Bacillaceae
	CP031068	5225480	Bacillaceae
	CP003492	4120406	Bacillaceae
	CP041757	4215631	Bacillaceae
	CP011101	4069266	Bacillaceae
	CP024647	4015817	Bacillaceae
	CP041372	3969553	Bacillaceae
	CP021911	4161448	Bacillaceae
	CP046653	3629561	Bacillaceae
	CP046564	4497340	Bacillaceae
	CP046057	4016906	Bacillaceae
	AP013294	3594618	Bacillaceae
	CP010406	3982168	Bacillaceae
	CP039727	5436472	Bacillaceae
	CP048117	3765941	Bacillaceae
	CP013950	4134042	Bacillaceae
	CP031065	5241886	Bacillaceae
	CP025258	4041647	Bacillaceae
	CP036356	5296886	Bacillaceae
	CP045403	4087834	Bacillaceae
	CP024921	4077762	Bacillaceae
	CP010075	3708888	Bacillaceae
	CP033064	4202080	Bacillaceae
	CP024794	5130901	Bacillaceae
	CP030028	5028825	Bacillaceae
	CP010014	4070380	Bacillaceae
	CP027061	3899251	Bacillaceae
	AP012496	4043042	Bacillaceae
	AP012495	7585470	Bacillaceae
	CP002468	4093599	Bacillaceae
	LN649259	4251652	Bacillaceae
	CP007173	4012933	Bacillaceae
	CP011115	4215633	Bacillaceae
	CP006881	4033459	Bacillaceae
	CP003783	4146839	Bacillaceae
	CP045672	4240660	Bacillaceae
	CP017763	4121999	Bacillaceae
	CP020915	4040837	Bacillaceae
	CP045826	4166516	Bacillaceae
	CP045825	4156459	Bacillaceae
	CP023409	4209045	Bacillaceae
	CP026010	4110138	Bacillaceae
	CP009748	3876276	Bacillaceae
	CP009749	3959897	Bacillaceae
	CP020023	4141030	Bacillaceae
	CP025941	4175806	Bacillaceae
	CP047485	4112497	Bacillaceae
	CP020722	4142593	Bacillaceae
	CP017112	4165121	Bacillaceae
	CP017314	4010416	Bacillaceae
	CP009611	3981674	Bacillaceae
	CP016767	4282516	Bacillaceae
	CP022890	4014255	Bacillaceae
	CP022891	4196031	Bacillaceae
	CP041015	4045619	Bacillaceae
	CP021903	4065429	Bacillaceae
	CP047325	4119195	Bacillaceae
	CP020367	4072961	Bacillaceae
	CP039935	4063004	Bacillaceae
	CP026608	5294779	Bacillaceae
	CP016894	4235115	Bacillaceae
	CP031784	4178124	Bacillaceae
	CP015222	4186269	Bacillaceae
	CP018295	4117900	Bacillaceae
	CP045425	4217124	Bacillaceae
	CP018184	4138265	Bacillaceae
	CP045823	4221278	Bacillaceae
	CP045824	4225362	Bacillaceae
	CP045821	4191568	Bacillaceae
	CP045820	4263919	Bacillaceae
	CP045819	4105407	Bacillaceae
	CP045818	4087720	Bacillaceae
	CP033205	4076736	Bacillaceae
	CP018173	4108293	Bacillaceae
	CP044498	4126713	Bacillaceae
	CP032315	4145727	Bacillaceae
	CP020102	4215607	Bacillaceae
	CP045817	4083248	Bacillaceae
	CP045816	4103324	Bacillaceae
	CP045922	4215512	Bacillaceae
	CP045812	4215511	Bacillaceae
	CP045811	4063468	Bacillaceae
	CP040528	4073059	Bacillaceae
	CP010053	4215367	Bacillaceae
	CP029461	4120380	Bacillaceae
	CP021123	4121982	Bacillaceae
	CP009796	4079669	Bacillaceae
	CP031693	4089165	Bacillaceae
	CP028209	4102601	Bacillaceae
	CP028212	4210797	Bacillaceae
	CP028213	4192708	Bacillaceae
	CP028215	4098278	Bacillaceae
	CP028217	4047680	Bacillaceae
	CP028201	4025706	Bacillaceae
	CP028202	4281863	Bacillaceae
	CP028218	4145782	Bacillaceae
	CP035226	4192706	Bacillaceae
	CP035230	4051556	Bacillaceae
	CP035231	4133685	Bacillaceae
	CP035402	4012178	Bacillaceae
	CP035403	4126329	Bacillaceae
	CP035406	4228232	Bacillaceae
	CP035411	4125217	Bacillaceae
	CP035413	4129860	Bacillaceae
	CP035414	4027238	Bacillaceae
	CP035390	4110403	Bacillaceae
	CP035391	4096442	Bacillaceae
	CP035394	4035212	Bacillaceae
	CP035395	4072580	Bacillaceae
	CP035397	4052954	Bacillaceae
	CP035400	4143632	Bacillaceae
	CP035401	4143637	Bacillaceae
	CP035161	4133206	Bacillaceae
	CP035165	4147136	Bacillaceae
	CP035162	4206125	Bacillaceae
	CP035163	4113808	Bacillaceae
	CP035166	4111350	Bacillaceae
	CP035164	4136114	Bacillaceae
	CP035167	4058528	Bacillaceae
	CP035191	4058524	Bacillaceae
	CP022287	4072531	Bacillaceae
	CP015004	4195195	Bacillaceae
	CP023257	4072939	Bacillaceae
	CP011882	4090708	Bacillaceae
	CP017676	4013819	Bacillaceae
	CP032310	4214174	Bacillaceae
	CP046448	4015360	Bacillaceae
	CP014840	4175482	Bacillaceae
	CP013984	4143890	Bacillaceae
	CP029465	4350498	Bacillaceae
	AP011541	4105380	Bacillaceae
	CP014471	4122154	Bacillaceae
	CP034943	4045538	Bacillaceae
	CP002905	4207222	Bacillaceae
	CP003329	4215610	Bacillaceae
	AP019714	4211090	Bacillaceae
	CP034484	4211262	Bacillaceae
	AL009126	4215606	Bacillaceae
	CP010052	4215619	Bacillaceae
	CP008698	4193640	Bacillaceae
	CP004405	4021944	Bacillaceae
	CP003695	4043754	Bacillaceae
	CP007800	4188369	Bacillaceae
	CP007409	4039155	Bacillaceae
	CP016852	4214812	Bacillaceae
	CP032872	4196696	Bacillaceae
	CP032857	4191876	Bacillaceae
	CP010314	4195102	Bacillaceae
	CP029052	4326173	Bacillaceae
	CP013654	4030837	Bacillaceae
	CP014166	4056281	Bacillaceae
	CP014858	4142635	Bacillaceae
	CP029609	4216133	Bacillaceae
	CP032852	4202955	Bacillaceae
	CP015375	4211343	Bacillaceae
	CP032853	4184648	Bacillaceae
	CP032861	4108100	Bacillaceae
	CP032863	4122398	Bacillaceae
	CP032865	4122184	Bacillaceae
	CP032867	4119216	Bacillaceae
	CP023755	4192617	Bacillaceae
	CP032855	4293706	Bacillaceae
	CP021892	4086692	Bacillaceae
	CP021499	3988649	Bacillaceae
	CP021889	3988630	Bacillaceae
	CP021921	4147173	Bacillaceae
	CP021507	4190134	Bacillaceae
	CP021498	3988602	Bacillaceae
	CP032860	4199434	Bacillaceae
	CP005997	4057487	Bacillaceae
	CP004019	4061186	Bacillaceae
	CP023704	4016170	Bacillaceae
	CP026365	2843874	Bacillaceae
	CP001903	5330088	Bacillaceae
	CP015250	5610045	Bacillaceae
	CP003889	5500501	Bacillaceae
	CP009351	5491311	Bacillaceae
	CP003752	5886036	Bacillaceae
	CP003763	5495278	Bacillaceae
	CP024771	5705934	Bacillaceae
	CP003687	5414494	Bacillaceae
	CP015176	5400819	Bacillaceae
	CP001907	5486830	Bacillaceae
	CP016194	5665360	Bacillaceae
	CP010089	5701188	Bacillaceae
	CP010106	5429688	Bacillaceae
	CP013275	5499731	Bacillaceae
	CP004870	5631672	Bacillaceae
	CP004069	5646799	Bacillaceae
	CP007607	5607837	Bacillaceae
	CP010577	5652292	Bacillaceae
	AP014864	5896839	Bacillaceae
	CP000485	5257091	Bacillaceae
	CP010088	5235838	Bacillaceae
	CP020754	5528419	Bacillaceae
	CP021061	5427594	Bacillaceae
	CP015150	5627121	Bacillaceae
	CP020723	5246329	Bacillaceae
	CP014282	5243635	Bacillaceae
	CP039721	5500615	Bacillaceae
	CP044978	5294964	Bacillaceae
	CP021436	5637049	Bacillaceae
	CP022345	5334660	Bacillaceae
	CP013274	5327397	Bacillaceae
	CP042270	5272357	Bacillaceae
	CP009335	5232696	Bacillaceae
	CP014847	5776895	Bacillaceae
	CP009600	5256240	Bacillaceae
	CP009720	5213295	Bacillaceae
	CP040782	5489489	Bacillaceae
	CP012099	5292526	Bacillaceae
	CP045030	5500376	Bacillaceae
	CP016588	5344151	Bacillaceae
	CP020002	5790408	Bacillaceae
	CP015350	5867736	Bacillaceae
	CP032608	5297164	Bacillaceae
	CP017577	5436019	Bacillaceae
	CP013000	5308217	Bacillaceae
	CP011349	5675007	Bacillaceae
	CP013055	5674369	Bacillaceae
	CP005935	6002284	Bacillaceae
	CP006863	4940474	Bacillaceae
	CP041071	5631167	Bacillaceae
	CP033052	3958372	Bacillaceae
	CP026362	4286362	Bacillaceae
	CP020893	3929787	Bacillaceae
	CP003838	3961368	Bacillaceae
	CP039297	3947206	Bacillaceae
	CP007165	4052546	Bacillaceae
	CP006890	4117023	Bacillaceae
	CP025939	4326822	Bacillaceae
	CP028441	3893029	Bacillaceae
	CP022341	4013317	Bacillaceae
	CP033967	4141063	Bacillaceae
	CP028439	3893071	Bacillaceae
	CP034203	3997902	Bacillaceae
	CP017775	4206167	Bacillaceae
	CP020805	3963726	Bacillaceae
	CP024922	4146154	Bacillaceae
	CP045926	3894709	Bacillaceae
	CP036518	3929842	Bacillaceae
	CP041145	3888990	Bacillaceae
	CP018133	4006746	Bacillaceae
	CP046918	4035062	Bacillaceae
	CP033054	4226250	Bacillaceae
	CP034037	3713516	Bacillaceae
	CP032144	3978954	Bacillaceae
	CP023414	4013888	Bacillaceae
	CP041192	3984544	Bacillaceae
	CP048002	4050296	Bacillaceae
	CP011937	3929792	Bacillaceae
	CP014838	3929745	Bacillaceae
	CP015443	4167153	Bacillaceae
	CP026610	4322979	Bacillaceae
	CP025341	3928489	Bacillaceae
	CP024897	3995812	Bacillaceae
	CP047268	3966723	Bacillaceae
	CP026533	4166265	Bacillaceae
	CP028437	3929794	Bacillaceae
	CP030150	4258978	Bacillaceae
	CP047157	3986791	Bacillaceae
	CP044133	3995978	Bacillaceae
	CP045186	3929791	Bacillaceae
	CP011686	4009746	Bacillaceae
	CP021011	3975220	Bacillaceae
	CP019040	4071980	Bacillaceae
	CP021495	3929760	Bacillaceae
	CP020874	3975084	Bacillaceae
	CP045711	4004056	Bacillaceae
	CP029473	3913872	Bacillaceae
	CP028440	3893072	Bacillaceae
	CP011346	4105955	Bacillaceae
	CP009679	4006002	Bacillaceae
	CP032506	3929799	Bacillaceae
	CP020375	3929789	Bacillaceae
	CP023075	4047350	Bacillaceae
	CP014990	3921966	Bacillaceae
	CP023859	4090582	Bacillaceae
	CP023748	3972310	Bacillaceae
	CP037417	4027435	Bacillaceae
	CP044349	3929782	Bacillaceae
	CP029034	3947271	Bacillaceae
	CP023341	3929697	Bacillaceae
	CP010556	3905973	Bacillaceae
	CP039380	3933292	Bacillaceae
	CP011278	3903017	Bacillaceae
	CP025308	4246605	Bacillaceae
	CP016395	4007450	Bacillaceae
	CP034176	4118468	Bacillaceae
	CP022556	3847297	Bacillaceae
	CP024203	4197217	Bacillaceae
	CP033576	4074913	Bacillaceae
	CP025079	4233757	Bacillaceae
	CP016371	3929772	Bacillaceae
	CP015417	3814720	Bacillaceae
	CP022654	4162569	Bacillaceae
	CP023320	4085488	Bacillaceae
[truncated: 14,376 more rows]
