# Supplementary material for: An efficient numerical representation of genome sequence: natural vector with covariance component
Source: PeerJ. 2022 Jun 16;10:e13544. doi: 10.7717/peerj.13544 (PMC9206847; doi:10.7717/peerj.13544)
Supplement: Supplemental Information 3 [file peerj-10-13544-s003.xlsx]

## Sheet: Data S3 | Virus
	Accession number	Sequence Length	Family name
	NC_020074	30024	Adenoviridae
	NC_002685	31301	Adenoviridae
	NC_035619	30620	Adenoviridae
	NC_001813	33213	Adenoviridae
	AC_000004	33213	Adenoviridae
	NC_024684	32965	Adenoviridae
	NC_004037	29576	Adenoviridae
	NC_025962	31735	Adenoviridae
	NC_009989	27751	Adenoviridae
	NC_021221	45781	Adenoviridae
	NC_017979	43376	Adenoviridae
	NC_024474	45480	Adenoviridae
	NC_014564	45413	Adenoviridae
	NC_022612	42940	Adenoviridae
	NC_022613	43686	Adenoviridae
	NC_031503	41981	Adenoviridae
	NC_024486	43734	Adenoviridae
	NC_001720	43804	Adenoviridae
	AC_000014	43804	Adenoviridae
	NC_015323	45667	Adenoviridae
	NC_000899	45063	Adenoviridae
	AC_000013	45063	Adenoviridae
	NC_014969	44055	Adenoviridae
	NC_016895	31806	Adenoviridae
	NC_015932	31616	Adenoviridae
	NC_001876	34446	Adenoviridae
	AC_000003	30536	Adenoviridae
	AC_000020	31323	Adenoviridae
	NC_030792	32690	Adenoviridae
	NC_027705	33090	Adenoviridae
	AC_000010	35524	Adenoviridae
	AC_000018	35514	Adenoviridae
	AC_000019	34794	Adenoviridae
	NC_012959	34920	Adenoviridae
	AC_000011	36519	Adenoviridae
	NC_017825	36711	Adenoviridae
	NC_012584	30570	Adenoviridae
	NC_002513	33034	Adenoviridae
	AC_000189	34094	Adenoviridae
	NC_002702	32621	Adenoviridae
	NC_015225	35499	Adenoviridae
	AC_000190	33501	Adenoviridae
	NC_031948	31481	Adenoviridae
	NC_034834	33945	Adenoviridae
	NC_035207	35030	Adenoviridae
	NC_030116	24662	Adenoviridae
	NC_029898	37545	Adenoviridae
	NC_029902	38073	Adenoviridae
	NC_029899	37556	Adenoviridae
	NC_030860	29581	Adenoviridae
	NC_030874	29162	Adenoviridae
	NC_034626	29923	Adenoviridae
	NC_035072	29812	Adenoviridae
	AC_000191	34185	Adenoviridae
	AC_000002	34446	Adenoviridae
	NC_001734	30536	Adenoviridae
	NC_001460	34125	Adenoviridae
	AC_000005	34125	Adenoviridae
	NC_011202	34794	Adenoviridae
	NC_011203	35343	Adenoviridae
	NC_001405	35937	Adenoviridae
	AC_000007	35937	Adenoviridae
	AC_000008	35938	Adenoviridae
	AC_000017	36001	Adenoviridae
	NC_010956	35083	Adenoviridae
	AC_000006	35100	Adenoviridae
	NC_003266	35994	Adenoviridae
	NC_001454	34214	Adenoviridae
	NC_006879	34450	Adenoviridae
	NC_000942	30944	Adenoviridae
	AC_000012	30944	Adenoviridae
	NC_014899	35203	Adenoviridae
	AC_000001	33034	Adenoviridae
	NC_020487	36838	Adenoviridae
	AC_000009	32621	Adenoviridae
	NC_024150	31709	Adenoviridae
	NC_028107	34064	Adenoviridae
	NC_028113	35685	Adenoviridae
	NC_034382	35555	Adenoviridae
	NC_006144	34246	Adenoviridae
	NC_021168	34391	Adenoviridae
	NC_028103	32939	Adenoviridae
	NC_028105	35159	Adenoviridae
	NC_022266	31967	Adenoviridae
	NC_020485	34302	Adenoviridae
	NC_025678	32661	Adenoviridae
	NC_032105	33562	Adenoviridae
	NC_027708	31848	Adenoviridae
	NC_002501	26163	Adenoviridae
	NC_015455	26284	Adenoviridae
	NC_016437	26340	Adenoviridae
	NC_001958	26263	Adenoviridae
	AC_000016	26263	Adenoviridae
	NC_028938	22613	Ampullaviridae
	NC_028787	28489	Ampullaviridae
	NC_009452	23814	Ampullaviridae
	NC_009233	186262	Ascoviridae
	NC_008361	156922	Ascoviridae
	NC_008518	174059	Ascoviridae
	NC_011335	119343	Ascoviridae
	NC_011423	111724	Baculoviridae
	NC_008520	132239	Baculoviridae
	NC_018504	123876	Baculoviridae
	NC_030240	128058	Baculoviridae
	NC_021924	129052	Baculoviridae
	NC_026430	125767	Baculoviridae
	NC_021923	140633	Baculoviridae
	NC_026922	157977	Baculoviridae
	NC_013953	156344	Baculoviridae
	NC_024625	151109	Baculoviridae
	NC_011616	148634	Baculoviridae
	NC_028636	135952	Baculoviridae
	NC_004690	113220	Baculoviridae
	NC_011345	155122	Baculoviridae
	NC_007921	147544	Baculoviridae
	NC_025960	148981	Baculoviridae
	NC_008035	126629	Baculoviridae
	NC_031761	131855	Baculoviridae
	NC_001623	133894	Baculoviridae
	NC_001962	128413	Baculoviridae
	NC_023442	120420	Baculoviridae
	NC_005137	131160	Baculoviridae
	NC_004778	129593	Baculoviridae
	NC_023177	124688	Baculoviridae
	NC_007151	149622	Baculoviridae
	NC_026268	139132	Baculoviridae
	NC_008293	135454	Baculoviridae
	NC_008586	131204	Baculoviridae
	NC_003083	118584	Baculoviridae
	NC_012639	141291	Baculoviridae
	NC_003094	130759	Baculoviridae
	NC_007767	132959	Baculoviridae
	NC_008348	168041	Baculoviridae
	NC_001973	161046	Baculoviridae
	NC_023681	152710	Baculoviridae
	NC_003529	155060	Baculoviridae
	NC_004117	158482	Baculoviridae
	NC_008725	111953	Baculoviridae
	NC_010276	156179	Baculoviridae
	NC_001875	131995	Baculoviridae
	NC_002169	135611	Baculoviridae
	NC_009011	131331	Baculoviridae
	NC_003102	139342	Baculoviridae
	NC_019945	132978	Baculoviridae
	NC_007383	134394	Baculoviridae
	NC_008168	104710	Baculoviridae
	NC_029304	111246	Baculoviridae
	NC_028491	98392	Baculoviridae
	NC_025257	102759	Baculoviridae
	NC_029996	134272	Baculoviridae
	NC_033780	144673	Baculoviridae
	NC_013797	108592	Baculoviridae
	NC_026511	140913	Baculoviridae
	NC_005038	99657	Baculoviridae
	NC_005839	131680	Baculoviridae
	NC_015398	101487	Baculoviridae
	NC_022646	101818	Baculoviridae
	NC_005068	110907	Baculoviridae
	NC_002816	123500	Baculoviridae
	NC_018875	119082	Baculoviridae
	NC_010240	169794	Baculoviridae
	NC_004062	119217	Baculoviridae
	NC_032255	112536	Baculoviridae
	NC_002593	100999	Baculoviridae
	NC_013772	176677	Baculoviridae
	NC_009503	124121	Baculoviridae
	NC_002331	178733	Baculoviridae
	NC_003084	108252	Baculoviridae
	NC_008252	84264	Baculoviridae
	NC_005906	81755	Baculoviridae
	NC_005905	86462	Baculoviridae
	NC_027923	132831	Baculoviridae
	NC_029997	105555	Baculoviridae
	NC_007409	62730	Bicaudaviridae
	NC_029316	70812	Bicaudaviridae
	NC_006268	75294	Bicaudaviridae
	NC_020077	76107	Bicaudaviridae
	NC_029029	45552	Myoviridae
	NC_022980	45798	Myoviridae
	NC_024785	44844	Myoviridae
	NC_028887	167431	Myoviridae
	NC_018863	162596	Myoviridae
	NC_022769	165238	Myoviridae
	NC_024788	162816	Myoviridae
	NC_022763	164297	Myoviridae
	NC_022088	163019	Myoviridae
	NC_018856	153962	Myoviridae
	NC_024216	160541	Myoviridae
	NC_005135	173591	Myoviridae
	NC_028986	153401	Myoviridae
	NC_004687	156102	Myoviridae
	NC_008207	153766	Myoviridae
	NC_021348	156558	Myoviridae
	NC_021346	157482	Myoviridae
	NC_021349	154872	Myoviridae
	NC_023737	155586	Myoviridae
	NC_023714	153882	Myoviridae
	NC_023733	154573	Myoviridae
	NC_029044	154434	Myoviridae
	NC_011272	153894	Myoviridae
	NC_011269	154017	Myoviridae
	NC_011270	154906	Myoviridae
	NC_011271	155372	Myoviridae
	NC_013650	155445	Myoviridae
	NC_023696	157568	Myoviridae
	NC_028869	153714	Myoviridae
	NC_023725	156646	Myoviridae
	NC_029001	32000	Myoviridae
	NC_009231	56538	Myoviridae
	NC_007917	53325	Myoviridae
	NC_011398	50930	Myoviridae
	NC_019507	182833	Myoviridae
	NC_027997	177534	Myoviridae
	NC_027996	175720	Myoviridae
	NC_025423	138658	Myoviridae
	NC_028982	137918	Myoviridae
	NC_028983	138877	Myoviridae
	NC_031909	134927	Myoviridae
	NC_018861	133572	Myoviridae
	NC_016562	132662	Myoviridae
	NC_015464	135041	Myoviridae
	NC_007623	211215	Myoviridae
	NC_013594	37235	Myoviridae
	NC_019455	37151	Myoviridae
	NC_028766	33755	Myoviridae
	NC_000929	36717	Myoviridae
	NC_027382	37146	Myoviridae
	NC_022771	156648	Myoviridae
	NC_021856	155631	Myoviridae
	NC_030903	152069	Myoviridae
	NC_028247	90000	Myoviridae
	NC_027293	87999	Myoviridae
	NC_028808	90743	Myoviridae
	NC_028935	88698	Myoviridae
	NC_031110	93129	Myoviridae
	NC_011811	84576	Myoviridae
	NC_015292	84565	Myoviridae
	NC_028825	87372	Myoviridae
	NC_027369	86231	Myoviridae
	NC_028872	86252	Myoviridae
	NC_029023	87712	Myoviridae
	NC_027337	88403	Myoviridae
	NC_012749	88487	Myoviridae
	NC_005282	86155	Myoviridae
	NC_027329	87510	Myoviridae
	NC_027360	87603	Myoviridae
	NC_031129	103445	Myoviridae
	NC_005856	94800	Myoviridae
	NC_001697	32355	Myoviridae
	NC_003315	31508	Myoviridae
	NC_008193	30505	Myoviridae
	NC_003313	33106	Myoviridae
	NC_009542	33985	Myoviridae
	NC_015266	40555	Myoviridae
	NC_015273	32317	Myoviridae
	NC_015265	37236	Myoviridae
	NC_007145	37639	Myoviridae
	NC_009236	36690	Myoviridae
	NC_009234	35741	Myoviridae
	NC_022750	33628	Myoviridae
	NC_001609	11624	Myoviridae
	NC_028896	32675	Myoviridae
	NC_028943	29237	Myoviridae
	NC_001317	30624	Myoviridae
	NC_001895	33593	Myoviridae
	NC_005056	32684	Myoviridae
	NC_028898	35764	Myoviridae
	NC_008201	34525	Myoviridae
	NC_003278	35580	Myoviridae
	NC_025115	40002	Myoviridae
	NC_009382	38760	Myoviridae
	NC_021774	29742	Myoviridae
	NC_029003	29733	Myoviridae
	NC_029015	33509	Myoviridae
	NC_005340	30636	Myoviridae
	NC_023588	33525	Myoviridae
	NC_004745	30728	Myoviridae
	NC_010821	316674	Myoviridae
	NC_028999	309208	Myoviridae
	NC_004629	280334	Myoviridae
	NC_028899	222888	Myoviridae
	NC_028950	223932	Myoviridae
	NC_010811	231255	Myoviridae
	NC_028962	140961	Myoviridae
	NC_027402	240413	Myoviridae
	NC_029080	142096	Myoviridae
	NC_007066	138715	Myoviridae
	NC_025417	140903	Myoviridae
	NC_019448	139806	Myoviridae
	NC_019726	141836	Myoviridae
	NC_005880	148317	Myoviridae
	NC_025416	141907	Myoviridae
	NC_025426	140807	Myoviridae
	NC_028765	142348	Myoviridae
	NC_022918	132123	Myoviridae
	NC_022920	139738	Myoviridae
	NC_023573	142094	Myoviridae
	NC_009811	137619	Myoviridae
	NC_021781	135281	Myoviridae
	NC_024383	135831	Myoviridae
	NC_019511	136326	Myoviridae
	NC_030933	133798	Myoviridae
	NC_020871	133057	Myoviridae
	NC_023009	127188	Myoviridae
	NC_022761	146193	Myoviridae
	NC_011421	132562	Myoviridae
	NC_018860	156176	Myoviridae
	NC_028890	162486	Myoviridae
	NC_020877	131332	Myoviridae
	NC_022090	134643	Myoviridae
	NC_007021	130706	Myoviridae
	NC_009904	142072	Myoviridae
	NC_012530	142111	Myoviridae
	NC_006565	131522	Myoviridae
	NC_015253	127065	Myoviridae
	NC_023561	173276	Myoviridae
	NC_014662	165540	Myoviridae
	NC_028686	166313	Myoviridae
	NC_031095	168758	Myoviridae
	NC_019500	168066	Myoviridae
	NC_014260	172253	Myoviridae
	NC_012741	171451	Myoviridae
	NC_028847	170527	Myoviridae
	NC_028881	170473	Myoviridae
	NC_014036	174436	Myoviridae
	NC_020080	174413	Myoviridae
	NC_028750	176081	Myoviridae
	NC_028857	172733	Myoviridae
	NC_027331	170341	Myoviridae
	NC_012740	166418	Myoviridae
	NC_009821	164270	Myoviridae
	NC_005066	164018	Myoviridae
	NC_018855	169158	Myoviridae
	NC_024124	169148	Myoviridae
	NC_004928	167560	Myoviridae
	NC_025437	169062	Myoviridae
	NC_020416	160221	Myoviridae
	NC_027344	158099	Myoviridae
	NC_023568	246964	Myoviridae
	NC_005083	244834	Myoviridae
	NC_021529	247511	Myoviridae
	NC_028829	248088	Myoviridae
	NC_028894	170336	Myoviridae
	NC_028925	170822	Myoviridae
	NC_028957	171541	Myoviridae
	NC_014792	169285	Myoviridae
	NC_014595	170605	Myoviridae
	NC_014660	167716	Myoviridae
	NC_014661	164093	Myoviridae
	NC_014663	169947	Myoviridae
	NC_018087	166687	Myoviridae
	NC_015250	159801	Myoviridae
	NC_019538	231743	Myoviridae
	NC_014636	225268	Myoviridae
	NC_023688	222006	Myoviridae
	NC_008208	161475	Myoviridae
	NC_007022	172963	Myoviridae
	NC_015251	235229	Myoviridae
	NC_005260	233234	Myoviridae
	NC_029013	177688	Myoviridae
	NC_028755	178182	Myoviridae
	NC_025414	178171	Myoviridae
	NC_031057	180219	Myoviridae
	NC_019398	178193	Myoviridae
	NC_025425	163424	Myoviridae
	NC_010105	170523	Myoviridae
	NC_025448	165179	Myoviridae
	NC_027979	168401	Myoviridae
	NC_012635	168394	Myoviridae
	NC_021344	176227	Myoviridae
	NC_031934	168929	Myoviridae
	NC_028927	167298	Myoviridae
	NC_028780	167124	Myoviridae
	NC_028448	167467	Myoviridae
	NC_024794	167318	Myoviridae
	NC_031928	169936	Myoviridae
	NC_019505	166452	Myoviridae
	NC_027983	167435	Myoviridae
	NC_019399	167396	Myoviridae
	NC_024125	168470	Myoviridae
	NC_025449	166783	Myoviridae
	NC_027349	166977	Myoviridae
	NC_019503	166499	Myoviridae
	NC_012638	165429	Myoviridae
	NC_014467	176788	Myoviridae
	NC_025419	168402	Myoviridae
	NC_008515	165890	Myoviridae
	NC_007023	180500	Myoviridae
	NC_000866	168903	Myoviridae
	NC_006883	252401	Myoviridae
	NC_006884	178249	Myoviridae
	NC_028762	161989	Myoviridae
	NC_026607	159914	Myoviridae
	NC_031065	159878	Myoviridae
	NC_024121	167266	Myoviridae
	NC_031085	166634	Myoviridae
	NC_030953	170650	Myoviridae
	NC_031011	168993	Myoviridae
	NC_031090	169621	Myoviridae
	NC_025829	164999	Myoviridae
	NC_015457	165919	Myoviridae
	NC_027130	172688	Myoviridae
	NC_019444	176043	Myoviridae
	NC_026923	179110	Myoviridae
	NC_026928	189418	Myoviridae
	NC_026927	228143	Myoviridae
	NC_026924	174885	Myoviridae
	NC_023587	189311	Myoviridae
	NC_027132	190768	Myoviridae
	NC_026926	192108	Myoviridae
	NC_019443	172879	Myoviridae
	NC_023584	170438	Myoviridae
	NC_006820	196280	Myoviridae
	NC_013085	194454	Myoviridae
	NC_008296	177300	Myoviridae
	NC_027353	167063	Myoviridae
	NC_027404	167785	Myoviridae
	NC_019451	66116	Myoviridae
	NC_026586	66299	Myoviridae
	NC_017974	149273	Myoviridae
	NC_024354	149162	Myoviridae
	NC_023717	151924	Myoviridae
	NC_019400	147940	Myoviridae
	NC_028672	149732	Myoviridae
	NC_022968	148567	Myoviridae
	NC_024134	139020	Myoviridae
	NC_019517	136947	Myoviridae
	NC_022323	136910	Myoviridae
	NC_011041	137947	Myoviridae
	NC_020201	142349	Myoviridae
	NC_016071	145964	Myoviridae
	NC_027351	147745	Myoviridae
	NC_019722	41351	Myoviridae
	NC_004456	43198	Myoviridae
	NC_027981	42612	Myoviridae
	NC_018857	158305	Myoviridae
	NC_024213	158100	Myoviridae
	NC_024211	158750	Myoviridae
	NC_016563	156897	Myoviridae
	NC_031117	44885	Myoviridae
	NC_028995	43216	Myoviridae
	NC_025462	99730	Myoviridae
	NC_031280	104906	Myoviridae
	NC_028855	44846	Myoviridae
	NC_027332	98170	Myoviridae
	NC_017984	46387	Myoviridae
	NC_025459	53744	Myoviridae
	NC_019527	43551	Myoviridae
	NC_020879	161978	Myoviridae
	NC_019543	160646	Myoviridae
	NC_014635	163875	Myoviridae
	NC_013597	43970	Myoviridae
	NC_019519	69391	Myoviridae
	NC_031252	51290	Myoviridae
	NC_026606	71200	Myoviridae
	NC_009760	218948	Myoviridae
	NC_019487	143986	Myoviridae
	NC_031245	221908	Myoviridae
	NC_031039	251042	Myoviridae
	NC_019515	93839	Myoviridae
	NC_031024	162308	Myoviridae
	NC_029069	165031	Myoviridae
	NC_029121	151417	Myoviridae
	NC_023501	159590	Myoviridae
	NC_031006	161552	Myoviridae
	NC_028944	162252	Myoviridae
	NC_031054	162415	Myoviridae
	NC_030920	165868	Myoviridae
	NC_024207	159656	Myoviridae
	NC_024205	159837	Myoviridae
	NC_027366	164302	Myoviridae
	NC_027374	161239	Myoviridae
	NC_031070	162375	Myoviridae
	NC_031037	163041	Myoviridae
	NC_031012	162151	Myoviridae
	NC_031049	161929	Myoviridae
	NC_031100	164443	Myoviridae
	NC_031027	162359	Myoviridae
	NC_031034	161140	Myoviridae
	NC_030925	138081	Myoviridae
	NC_031116	163345	Myoviridae
	NC_020081	149844	Myoviridae
	NC_020873	158621	Myoviridae
	NC_024137	152778	Myoviridae
	NC_027355	159071	Myoviridae
	NC_024792	160281	Myoviridae
	NC_031056	157501	Myoviridae
	NC_023719	497513	Myoviridae
	NC_027352	159492	Myoviridae
	NC_015721	23931	Myoviridae
	NC_019525	45354	Myoviridae
	NC_029104	54312	Myoviridae
	NC_028969	52955	Myoviridae
	NC_005886	47399	Myoviridae
	NC_011216	37635	Myoviridae
	NC_021343	35430	Myoviridae
	NC_005263	48177	Myoviridae
	NC_005342	48024	Myoviridae
	NC_004333	48247	Myoviridae
	NC_009015	72415	Myoviridae
	NC_005882	36748	Myoviridae
	NC_009604	47382	Myoviridae
	NC_009237	37446	Myoviridae
	NC_025422	155997	Myoviridae
	NC_020860	44557	Myoviridae
	NC_007581	185683	Myoviridae
	NC_024144	54279	Myoviridae
	NC_029048	131704	Myoviridae
	NC_028951	32846	Myoviridae
	NC_028764	49316	Myoviridae
	NC_028838	33274	Myoviridae
	NC_029116	33596	Myoviridae
	NC_028996	54295	Myoviridae
	NC_028883	44461	Myoviridae
	NC_019421	48396	Myoviridae
	NC_028959	52261	Myoviridae
	NC_019422	31674	Myoviridae
	NC_021531	223989	Myoviridae
	NC_019927	47611	Myoviridae
	NC_028773	182145	Myoviridae
	NC_019401	358663	Myoviridae
	NC_021071	177211	Myoviridae
	NC_020855	192497	Myoviridae
	NC_028663	188632	Myoviridae
	NC_031235	194437	Myoviridae
	NC_031242	174307	Myoviridae
	NC_019516	161440	Myoviridae
	NC_013697	157486	Myoviridae
	NC_025452	155346	Myoviridae
	NC_019925	152427	Myoviridae
	NC_026611	43129	Myoviridae
	NC_028683	177643	Myoviridae
	NC_020082	42746	Myoviridae
	NC_021342	43378	Myoviridae
	NC_031048	41918	Myoviridae
	NC_026014	35814	Myoviridae
	NC_023693	148612	Myoviridae
	NC_010106	52975	Myoviridae
	NC_003356	42575	Myoviridae
	NC_027339	38389	Myoviridae
	NC_003444	37074	Myoviridae
	NC_019526	345809	Myoviridae
	NC_027335	145518	Myoviridae
	NC_029009	147589	Myoviridae
	NC_029026	130952	Myoviridae
	NC_019932	29564	Myoviridae
	NC_027340	162160	Myoviridae
	NC_015295	47279	Myoviridae
	NC_031107	246291	Myoviridae
	NC_031126	244840	Myoviridae
	NC_031007	223935	Myoviridae
	NC_031127	240761	Myoviridae
	NC_031010	246390	Myoviridae
	NC_031043	229501	Myoviridae
	NC_019504	56621	Myoviridae
	NC_023557	271084	Myoviridae
	NC_025447	348532	Myoviridae
	NC_029091	168771	Myoviridae
	NC_025830	120938	Myoviridae
	NC_025441	66854	Myoviridae
	NC_031047	170770	Myoviridae
	NC_027364	348113	Myoviridae
	NC_020079	147737	Myoviridae
	NC_028248	136896	Myoviridae
	NC_031030	170788	Myoviridae
	NC_031082	87662	Myoviridae
	NC_031103	165772	Myoviridae
	NC_016570	157304	Myoviridae
	NC_027995	41666	Myoviridae
	NC_025446	157308	Myoviridae
	NC_025430	42351	Myoviridae
	NC_019452	156628	Myoviridae
	NC_027125	47142	Myoviridae
	NC_004827	43033	Myoviridae
	NC_017975	167292	Myoviridae
	NC_010342	39245	Myoviridae
	NC_011142	47453	Myoviridae
	NC_022343	159991	Myoviridae
	NC_020204	48814	Myoviridae
	NC_027399	346602	Myoviridae
	NC_028659	142987	Myoviridae
	NC_031087	168272	Myoviridae
	NC_007924	38239	Myoviridae
	NC_027990	48211	Myoviridae
	NC_029058	106071	Myoviridae
	NC_024206	38269	Myoviridae
	NC_019782	36566	Myoviridae
	NC_024364	131952	Myoviridae
	NC_024360	138036	Myoviridae
	NC_024787	132541	Myoviridae
	NC_024359	133048	Myoviridae
	NC_025440	134369	Myoviridae
	NC_029002	169223	Myoviridae
	NC_008562	162109	Myoviridae
	NC_031020	163201	Myoviridae
	NC_011273	164602	Myoviridae
	NC_031080	160985	Myoviridae
	NC_004084	58498	Myoviridae
	NC_028940	170286	Myoviridae
	NC_023865	55098	Myoviridae
	NC_019522	48454	Myoviridae
	NC_020484	147284	Myoviridae
	NC_020847	38327	Myoviridae
	NC_020845	180977	Myoviridae
	NC_015280	181044	Myoviridae
	NC_015284	183806	Myoviridae
	NC_015283	176428	Myoviridae
	NC_021559	179063	Myoviridae
	NC_015290	182180	Myoviridae
	NC_028955	197361	Myoviridae
	NC_029094	131903	Myoviridae
	NC_028652	94109	Myoviridae
	NC_030910	93754	Myoviridae
	NC_028817	93879	Myoviridae
	NC_017972	280538	Myoviridae
	NC_016571	284757	Myoviridae
	NC_022096	258139	Myoviridae
	NC_022967	92495	Myoviridae
	NC_029083	93464	Myoviridae
	NC_030940	32637	Myoviridae
	NC_023601	97906	Myoviridae
	NC_023006	43564	Myoviridae
	NC_028939	68871	Myoviridae
	NC_028882	84583	Myoviridae
	NC_030934	90552	Myoviridae
	NC_029065	98765	Myoviridae
	NC_011703	66235	Myoviridae
	NC_026587	86246	Myoviridae
	NC_026600	66181	Myoviridae
	NC_019918	92777	Myoviridae
	NC_028745	66103	Myoviridae
	NC_028971	66111	Myoviridae
	NC_007810	66015	Myoviridae
	NC_019450	93017	Myoviridae
	NC_017674	66275	Myoviridae
	NC_015272	88322	Myoviridae
	NC_019935	64144	Myoviridae
	NC_011165	64427	Myoviridae
	NC_011166	66530	Myoviridae
	NC_015294	93198	Myoviridae
	NC_022970	88097	Myoviridae
	NC_022966	88135	Myoviridae
	NC_022974	88255	Myoviridae
	NC_022986	93147	Myoviridae
	NC_019913	91715	Myoviridae
	NC_011810	65764	Myoviridae
	NC_011756	66390	Myoviridae
	NC_020841	40803	Myoviridae
	NC_030948	167619	Myoviridae
	NC_027296	53721	Myoviridae
	NC_021560	53102	Myoviridae
	NC_021557	37378	Myoviridae
	NC_025429	156446	Myoviridae
	NC_025427	54506	Myoviridae
	NC_021347	142563	Myoviridae
	NC_004735	129908	Myoviridae
	NC_029072	94766	Myoviridae
	NC_029050	51896	Myoviridae
	NC_029042	156833	Myoviridae
	NC_031939	89817	Myoviridae
	NC_031045	157855	Myoviridae
	NC_031042	111325	Myoviridae
	NC_019488	34117	Myoviridae
	NC_028699	40740	Myoviridae
	NC_028701	33509	Myoviridae
	NC_019910	159624	Myoviridae
	NC_031128	158081	Myoviridae
	NC_027119	157498	Myoviridae
	NC_022772	156338	Myoviridae
	NC_022768	154701	Myoviridae
	NC_016073	157950	Myoviridae
	NC_019530	157785	Myoviridae
	NC_023856	152460	Myoviridae
	NC_024122	162910	Myoviridae
	NC_015296	157061	Myoviridae
	NC_020083	157834	Myoviridae
	NC_025436	133824	Myoviridae
	NC_025470	139004	Myoviridae
	NC_025458	43510	Myoviridae
	NC_025463	49640	Myoviridae
	NC_025466	40161	Myoviridae
	NC_023594	54791	Myoviridae
	NC_021857	41475	Myoviridae
	NC_022749	39758	Myoviridae
	NC_013693	158006	Myoviridae
	NC_027204	194701	Myoviridae
	NC_028676	149218	Myoviridae
	NC_028945	206713	Myoviridae
	NC_019521	219372	Myoviridae
	NC_027991	147303	Myoviridae
	NC_029000	162327	Myoviridae
	NC_005294	42935	Myoviridae
	NC_020837	198013	Myoviridae
	NC_021530	171407	Myoviridae
	NC_015569	178563	Myoviridae
	NC_021536	171797	Myoviridae
	NC_020859	175430	Myoviridae
	NC_020486	171211	Myoviridae
	NC_015281	179563	Myoviridae
	NC_015282	174079	Myoviridae
	NC_015279	190789	Myoviridae
	NC_020875	182801	Myoviridae
	NC_015289	176184	Myoviridae
	NC_015287	232878	Myoviridae
	NC_031944	185102	Myoviridae
	NC_031935	186386	Myoviridae
	NC_015286	175230	Myoviridae
	NC_008584	152372	Myoviridae
	NC_015937	151483	Myoviridae
	NC_020843	126434	Myoviridae
	NC_019457	44492	Myoviridae
	NC_015157	125956	Myoviridae
	NC_021070	33277	Myoviridae
	NC_027368	33828	Myoviridae
	NC_019518	44485	Myoviridae
	NC_022747	34145	Myoviridae
	NC_024369	41569	Myoviridae
	NC_009016	38197	Myoviridae
	NC_017981	49981	Myoviridae
	NC_007710	46643	Myoviridae
	NC_016163	262391	Myoviridae
	NC_019909	168809	Myoviridae
	NC_028820	162101	Myoviridae
	NC_031066	39434	Podoviridae
	NC_031092	39158	Podoviridae
	NC_031123	39444	Podoviridae
	NC_031018	39274	Podoviridae
	NC_028772	39133	Podoviridae
	NC_011045	38841	Podoviridae
	NC_015249	39270	Podoviridae
	NC_011040	39816	Podoviridae
	NC_011042	39252	Podoviridae
	NC_007456	39704	Podoviridae
	NC_003298	38208	Podoviridae
	NC_022744	39860	Podoviridae
	NC_019510	39282	Podoviridae
	NC_027387	38810	Podoviridae
	NC_031943	40470	Podoviridae
	NC_001604	39937	Podoviridae
	NC_011534	39472	Podoviridae
	NC_011085	38457	Podoviridae
	NC_027292	39167	Podoviridae
	NC_021062	40192	Podoviridae
	NC_015208	39562	Podoviridae
	NC_015264	40973	Podoviridae
	NC_024362	40472	Podoviridae
	NC_011107	42961	Podoviridae
	NC_004665	37359	Podoviridae
	NC_031258	39696	Podoviridae
	NC_010807	38815	Podoviridae
	NC_015271	38368	Podoviridae
	NC_019416	38513	Podoviridae
	NC_015159	39162	Podoviridae
	NC_013651	38497	Podoviridae
	NC_007149	39503	Podoviridae
	NC_008694	38564	Podoviridae
	NC_004777	37555	Podoviridae
	NC_001271	39600	Podoviridae
	NC_025451	38646	Podoviridae
	NC_023715	38616	Podoviridae
	NC_011038	38677	Podoviridae
	NC_019528	41572	Podoviridae
	NC_006882	45176	Podoviridae
	NC_003390	46675	Podoviridae
	NC_009531	46214	Podoviridae
	NC_023576	39207	Podoviridae
	NC_023548	39651	Podoviridae
	NC_023558	38966	Podoviridae
	NC_016657	47055	Podoviridae
	NC_016658	47741	Podoviridae
	NC_016659	47536	Podoviridae
	NC_019926	45554	Podoviridae
	NC_031937	38979	Podoviridae
	NC_024379	39093	Podoviridae
	NC_023736	40411	Podoviridae
	NC_025456	46547	Podoviridae
	NC_019911	42081	Podoviridae
	NC_023570	40739	Podoviridae
	NC_022916	41604	Podoviridae
	NC_020078	41796	Podoviridae
	NC_019520	42608	Podoviridae
	NC_031014	40008	Podoviridae
	NC_009935	43200	Podoviridae
	NC_010326	43548	Podoviridae
	NC_022746	42957	Podoviridae
	NC_022091	42874	Podoviridae
	NC_013638	43144	Podoviridae
	NC_012418	43152	Podoviridae
	NC_017865	42966	Podoviridae
	NC_027375	43227	Podoviridae
	NC_011201	43079	Podoviridae
	NC_022917	44578	Podoviridae
	NC_012662	43931	Podoviridae
	NC_022982	43869	Podoviridae
	NC_020414	43931	Podoviridae
	NC_019403	43731	Podoviridae
	NC_025450	44366	Podoviridae
	NC_019542	44400	Podoviridae
	NC_028916	44573	Podoviridae
	NC_031271	43602	Podoviridae
	NC_021337	31185	Podoviridae
	NC_021316	42185	Podoviridae
	NC_028848	41805	Podoviridae
	NC_028987	41243	Podoviridae
	NC_028684	41563	Podoviridae
	NC_028679	40938	Podoviridae
	NC_028675	41526	Podoviridae
	NC_009014	45445	Podoviridae
	NC_008152	44385	Podoviridae
	NC_007637	45251	Podoviridae
	NC_015719	40940	Podoviridae
	NC_023567	43766	Podoviridae
	NC_011043	41181	Podoviridae
	NC_025418	43871	Podoviridae
	NC_028800	41698	Podoviridae
	NC_028688	40114	Podoviridae
	NC_028664	43963	Podoviridae
	NC_013647	41119	Podoviridae
	NC_013649	43809	Podoviridae
	NC_028977	41054	Podoviridae
	NC_028670	44203	Podoviridae
	NC_031025	42201	Podoviridae
	NC_031246	43267	Podoviridae
	NC_028816	43809	Podoviridae
	NC_028870	43595	Podoviridae
	NC_019454	44546	Podoviridae
	NC_015585	43032	Podoviridae
	NC_009936	41593	Podoviridae
	NC_005045	42519	Podoviridae
	NC_004831	43769	Podoviridae
	NC_022987	43940	Podoviridae
	NC_021798	145343	Podoviridae
	NC_021788	145865	Podoviridae
	NC_024786	71248	Podoviridae
	NC_024790	71778	Podoviridae
	NC_024142	72583	Podoviridae
	NC_018854	69855	Podoviridae
	NC_015933	72917	Podoviridae
	NC_019423	72570	Podoviridae
	NC_023589	71629	Podoviridae
	NC_019420	41549	Podoviridae
	NC_024140	72028	Podoviridae
	NC_031063	72697	Podoviridae
	NC_013692	72544	Podoviridae
	NC_023556	72329	Podoviridae
	NC_023581	77792	Podoviridae
	NC_024367	75028	Podoviridae
	NC_019485	59080	Podoviridae
	NC_019514	74669	Podoviridae
	NC_020849	76802	Podoviridae
	NC_027345	73008	Podoviridae
	NC_029101	72192	Podoviridae
	NC_027388	73050	Podoviridae
	NC_021772	72394	Podoviridae
	NC_021782	72098	Podoviridae
	NC_012697	74611	Podoviridae
	NC_012696	73325	Podoviridae
	NC_020862	74485	Podoviridae
	NC_021540	69278	Podoviridae
	NC_020868	76718	Podoviridae
	NC_020848	76705	Podoviridae
	NC_008720	70153	Podoviridae
	NC_005841	41391	Podoviridae
	NC_031019	41809	Podoviridae
	NC_011976	43016	Podoviridae
	NC_013059	40975	Podoviridae
	NC_014900	40986	Podoviridae
	NC_018275	39783	Podoviridae
	NC_002730	38297	Podoviridae
	NC_002371	41724	Podoviridae
	NC_011802	41941	Podoviridae
	NC_004348	40679	Podoviridae
	NC_005344	39043	Podoviridae
	NC_019402	76631	Podoviridae
	NC_028903	77266	Podoviridae
	NC_018859	77315	Podoviridae
	NC_018835	77448	Podoviridae
	NC_010324	77554	Podoviridae
	NC_023593	76184	Podoviridae
	NC_027395	77327	Podoviridae
	NC_001825	19343	Podoviridae
	NC_007046	18199	Podoviridae
	NC_031046	17641	Podoviridae
	NC_023550	17869	Podoviridae
	NC_004679	18227	Podoviridae
	NC_009875	17938	Podoviridae
	NC_004678	16784	Podoviridae
	NC_004814	16687	Podoviridae
	NC_004165	18630	Podoviridae
	NC_002649	21129	Podoviridae
	NC_011048	19282	Podoviridae
	NC_009643	17171	Podoviridae
	NC_019523	18919	Podoviridae
	NC_002515	11660	Podoviridae
	NC_017980	18397	Podoviridae
	NC_018083	17972	Podoviridae
	NC_018084	18078	Podoviridae
	NC_016565	18168	Podoviridae
	NC_019447	38253	Podoviridae
	NC_019446	41148	Podoviridae
	NC_027984	57677	Podoviridae
	NC_000924	61670	Podoviridae
	NC_010237	63395	Podoviridae
	NC_004914	62706	Podoviridae
	NC_029120	60875	Podoviridae
	NC_025434	62699	Podoviridae
	NC_028660	61035	Podoviridae
	NC_028449	63569	Podoviridae
	NC_019442	60523	Podoviridae
	NC_028685	62851	Podoviridae
	NC_019512	26836	Podoviridae
	NC_019928	26215	Podoviridae
	NC_019931	26449	Podoviridae
	NC_019445	44784	Podoviridae
	NC_019813	44030	Podoviridae
	NC_010325	45625	Podoviridae
	NC_004466	45503	Podoviridae
	NC_027118	39422	Podoviridae
	NC_005879	39853	Podoviridae
	NC_005891	39786	Podoviridae
	NC_019541	45364	Podoviridae
	NC_031086	40570	Podoviridae
	NC_025457	42654	Podoviridae
	NC_021532	103910	Podoviridae
	NC_024358	41750	Podoviridae
	NC_031121	25908	Podoviridae
	NC_031015	26504	Podoviridae
	NC_021336	27190	Podoviridae
	NC_028782	40024	Podoviridae
	NC_031032	24320	Podoviridae
	NC_028789	18609	Podoviridae
	NC_022764	39874	Podoviridae
	NC_028926	40000	Podoviridae
	NC_027372	39639	Podoviridae
	NC_022770	39844	Podoviridae
	NC_027394	40214	Podoviridae
	NC_011551	39867	Podoviridae
	NC_005357	42493	Podoviridae
	NC_005262	63882	Podoviridae
	NC_005887	42415	Podoviridae
	NC_012743	62715	Podoviridae
	NC_019917	62952	Podoviridae
	NC_018452	61847	Podoviridae
	NC_029092	44974	Podoviridae
	NC_021803	72369	Podoviridae
	NC_021806	100418	Podoviridae
	NC_021794	71443	Podoviridae
	NC_021789	75994	Podoviridae
	NC_021796	72534	Podoviridae
	NC_021792	72961	Podoviridae
	NC_027988	47636	Podoviridae
	NC_028880	38625	Podoviridae
	NC_029070	41620	Podoviridae
	NC_022751	42480	Podoviridae
	NC_028702	38084	Podoviridae
	NC_027348	73882	Podoviridae
	NC_029102	36051	Podoviridae
	NC_028795	31522	Podoviridae
	NC_031077	41760	Podoviridae
	NC_004913	59866	Podoviridae
	NC_000902	60942	Podoviridae
	NC_019501	39646	Podoviridae
	NC_025445	40981	Podoviridae
	NC_027398	38742	Podoviridae
	NC_028656	65955	Podoviridae
	NC_025467	17972	Podoviridae
	NC_028693	18607	Podoviridae
	NC_016767	60714	Podoviridae
	NC_023579	75568	Podoviridae
	NC_031062	75147	Podoviridae
	NC_031114	39235	Podoviridae
	NC_027330	45403	Podoviridae
	NC_018846	60894	Podoviridae
	NC_028822	40829	Podoviridae
	NC_028863	40477	Podoviridae
	NC_027381	68365	Podoviridae
	NC_007804	39104	Podoviridae
	NC_028668	77779	Podoviridae
	NC_028673	73419	Podoviridae
	NC_028665	56982	Podoviridae
	NC_028653	67617	Podoviridae
	NC_000935	36524	Podoviridae
	NC_024149	18899	Podoviridae
	NC_010363	18762	Podoviridae
	NC_009817	79232	Podoviridae
	NC_019549	40048	Podoviridae
	NC_019550	38997	Podoviridae
	NC_025431	45718	Podoviridae
	NC_031115	39616	Podoviridae
	NC_028662	50418	Podoviridae
	NC_003085	49534	Podoviridae
	NC_029081	45633	Podoviridae
	NC_031068	43902	Podoviridae
	NC_031096	44570	Podoviridae
	NC_020481	34892	Podoviridae
	NC_020482	39921	Podoviridae
	NC_020483	42084	Podoviridae
	NC_009551	43249	Podoviridae
	NC_008367	40938	Podoviridae
	NC_016564	95299	Podoviridae
	NC_024329	39425	Podoviridae
	NC_020835	47325	Podoviridae
	NC_027363	41480	Podoviridae
	NC_027379	43642	Podoviridae
	NC_027390	45169	Podoviridae
	NC_027342	41268	Podoviridae
	NC_021300	43882	Podoviridae
	NC_019923	42689	Podoviridae
	NC_016764	40058	Podoviridae
	NC_028919	45673	Podoviridae
	NC_028836	42508	Podoviridae
	NC_028885	72378	Podoviridae
	NC_005884	43783	Podoviridae
	NC_028661	41149	Podoviridae
	NC_023005	41386	Podoviridae
	NC_017971	46271	Podoviridae
	NC_018850	45517	Podoviridae
	NC_031104	72979	Podoviridae
	NC_026602	43639	Podoviridae
	NC_030923	45417	Podoviridae
	NC_007807	43365	Podoviridae
	NC_026599	45808	Podoviridae
	NC_028933	45626	Podoviridae
	NC_006552	65195	Podoviridae
	NC_029017	73420	Podoviridae
	NC_024123	64113	Podoviridae
	NC_013691	74901	Podoviridae
	NC_022971	45344	Podoviridae
	NC_023583	45696	Podoviridae
	NC_021864	55282	Podoviridae
	NC_028988	44360	Podoviridae
	NC_029007	43745	Podoviridae
	NC_022915	40471	Podoviridae
	NC_029061	36315	Podoviridae
	NC_002519	39898	Podoviridae
	NC_019540	49390	Podoviridae
	NC_031946	40443	Podoviridae
	NC_030919	42418	Podoviridae
	NC_015938	89916	Podoviridae
	NC_028696	41338	Podoviridae
	NC_017985	40128	Podoviridae
	NC_025443	52869	Podoviridae
	NC_004775	39671	Podoviridae
	NC_016761	38684	Podoviridae
	NC_031008	17861	Podoviridae
	NC_028697	33900	Podoviridae
	NC_028666	36595	Podoviridae
	NC_028700	37976	Podoviridae
	NC_008464	60238	Podoviridae
	NC_025464	44147	Podoviridae
	NC_029031	45218	Podoviridae
	NC_020867	44892	Podoviridae
	NC_020838	45728	Podoviridae
	NC_009990	37313	Podoviridae
	NC_023863	66316	Podoviridae
	NC_024791	50440	Podoviridae
	NC_015158	49675	Podoviridae
	NC_027393	39530	Podoviridae
	NC_028799	66708	Podoviridae
	NC_025822	42544	Podoviridae
	NC_023605	41529	Podoviridae
	NC_027397	39725	Podoviridae
	NC_021776	42313	Podoviridae
	NC_020488	38682	Podoviridae
	NC_003907	46012	Podoviridae
	NC_018270	33594	Podoviridae
	NC_020205	42963	Podoviridae
	NC_013599	36674	Podoviridae
	NC_028655	39235	Podoviridae
	NC_028850	41449	Podoviridae
	NC_026594	56537	Siphoviridae
	NC_028770	59878	Siphoviridae
	NC_020478	49259	Siphoviridae
	NC_022773	50354	Siphoviridae
	NC_020479	49425	Siphoviridae
	NC_020477	49458	Siphoviridae
	NC_020480	50161	Siphoviridae
	NC_022766	49246	Siphoviridae
	NC_022765	49836	Siphoviridae
	NC_021298	51252	Siphoviridae
	NC_004689	70797	Siphoviridae
	NC_011292	68952	Siphoviridae
	NC_011039	70110	Siphoviridae
	NC_022063	70115	Siphoviridae
	NC_023701	69864	Siphoviridae
	NC_022328	70236	Siphoviridae
	NC_022331	69309	Siphoviridae
	NC_028968	71214	Siphoviridae
	NC_008195	70654	Siphoviridae
	NC_023554	70841	Siphoviridae
	NC_011044	69904	Siphoviridae
	NC_023741	69641	Siphoviridae
	NC_028934	72139	Siphoviridae
	NC_028691	68227	Siphoviridae
	NC_024363	68807	Siphoviridae
	NC_023711	68720	Siphoviridae
	NC_028803	69118	Siphoviridae
	NC_008197	68427	Siphoviridae
	NC_023740	68311	Siphoviridae
	NC_028682	69030	Siphoviridae
	NC_028907	68839	Siphoviridae
	NC_023727	68494	Siphoviridae
	NC_025438	67744	Siphoviridae
	NC_027985	68016	Siphoviridae
	NC_028658	68735	Siphoviridae
	NC_028942	68293	Siphoviridae
	NC_021310	68598	Siphoviridae
	NC_023563	68262	Siphoviridae
	NC_028674	68355	Siphoviridae
	NC_028690	68472	Siphoviridae
	NC_028681	68367	Siphoviridae
	NC_028689	67774	Siphoviridae
	NC_023742	68711	Siphoviridae
	NC_022983	68196	Siphoviridae
	NC_023686	67949	Siphoviridae
	NC_008199	69059	Siphoviridae
	NC_008204	67188	Siphoviridae
	NC_004684	67480	Siphoviridae
	NC_024135	42392	Siphoviridae
	NC_008689	44857	Siphoviridae
	NC_004617	42722	Siphoviridae
	NC_005356	41708	Siphoviridae
	NC_014461	73453	Siphoviridae
	NC_015584	75960	Siphoviridae
	NC_023732	69279	Siphoviridae
	NC_001629	22195	Siphoviridae
	NC_031071	22825	Siphoviridae
	NC_031009	22884	Siphoviridae
	NC_031075	22240	Siphoviridae
	NC_031002	21697	Siphoviridae
	NC_031044	22179	Siphoviridae
	NC_001706	22172	Siphoviridae
	NC_019449	31841	Siphoviridae
	NC_025420	32975	Siphoviridae
	NC_025415	32799	Siphoviridae
	NC_025421	29616	Siphoviridae
	NC_022989	31080	Siphoviridae
	NC_022762	33996	Siphoviridae
	NC_021791	39148	Siphoviridae
	NC_021795	38776	Siphoviridae
	NC_021790	39189	Siphoviridae
	NC_020842	79114	Siphoviridae
	NC_029024	56505	Siphoviridae
	NC_011167	53104	Siphoviridae
	NC_023729	43036	Siphoviridae
	NC_023730	42594	Siphoviridae
	NC_013936	52141	Siphoviridae
	NC_023698	54470	Siphoviridae
	NC_011054	58037	Siphoviridae
	NC_004680	59471	Siphoviridae
	NC_004686	56276	Siphoviridae
	NC_023728	56461	Siphoviridae
	NC_023721	54411	Siphoviridae
	NC_011288	58471	Siphoviridae
	NC_023746	57387	Siphoviridae
	NC_008196	56852	Siphoviridae
	NC_011287	58554	Siphoviridae
	NC_008205	56692	Siphoviridae
	NC_011289	58578	Siphoviridae
	NC_023699	59016	Siphoviridae
	NC_025433	58550	Siphoviridae
	NC_009820	58692	Siphoviridae
	NC_014901	59230	Siphoviridae
	NC_023697	48420	Siphoviridae
	NC_011291	47057	Siphoviridae
	NC_004683	57050	Siphoviridae
	NC_031930	59518	Siphoviridae
	NC_025442	59578	Siphoviridae
	NC_021779	59746	Siphoviridae
	NC_021780	59454	Siphoviridae
	NC_021783	59254	Siphoviridae
	NC_019417	59203	Siphoviridae
	NC_029079	75339	Siphoviridae
	NC_008194	74483	Siphoviridae
	NC_004681	75931	Siphoviridae
	NC_011056	75811	Siphoviridae
	NC_011055	76312	Siphoviridae
	NC_028906	75933	Siphoviridae
	NC_004685	69777	Siphoviridae
	NC_023712	71341	Siphoviridae
	NC_028954	36065	Siphoviridae
	NC_005178	37611	Siphoviridae
	NC_008717	36415	Siphoviridae
	NC_027298	36814	Siphoviridae
	NC_009818	36409	Siphoviridae
	NC_011613	36632	Siphoviridae
	NC_011611	36885	Siphoviridae
	NC_023700	34553	Siphoviridae
	NC_002484	56426	Siphoviridae
	NC_016765	54024	Siphoviridae
	NC_028692	15524	Siphoviridae
	NC_030944	74073	Siphoviridae
	NC_030914	75462	Siphoviridae
	NC_005284	54865	Siphoviridae
	NC_009235	48674	Siphoviridae
	NC_003309	53373	Siphoviridae
	NC_023555	43017	Siphoviridae
	NC_021063	47724	Siphoviridae
	NC_022054	48228	Siphoviridae
	NC_026590	90460	Siphoviridae
	NC_009993	53746	Siphoviridae
	NC_029074	75987	Siphoviridae
	NC_019539	42391	Siphoviridae
	NC_028698	41868	Siphoviridae
	NC_021777	43447	Siphoviridae
	NC_021317	21248	Siphoviridae
	NC_026017	41880	Siphoviridae
	NC_016763	43221	Siphoviridae
	NC_022752	42665	Siphoviridae
	NC_009232	42572	Siphoviridae
	NC_006940	40793	Siphoviridae
	NC_027993	43587	Siphoviridae
	NC_027994	41632	Siphoviridae
	NC_021775	42215	Siphoviridae
	NC_028746	44249	Siphoviridae
	NC_024783	44332	Siphoviridae
	NC_019724	43741	Siphoviridae
	NC_019419	43457	Siphoviridae
	NC_012223	44899	Siphoviridae
	NC_027383	44613	Siphoviridae
	NC_016566	44077	Siphoviridae
	NC_013600	45169	Siphoviridae
	NC_028805	126341	Siphoviridae
	NC_028834	48216	Siphoviridae
	NC_028768	49714	Siphoviridae
	NC_031231	58871	Siphoviridae
	NC_031254	58560	Siphoviridae
	NC_029018	50854	Siphoviridae
	NC_028798	50882	Siphoviridae
	NC_028860	52392	Siphoviridae
	NC_028757	50768	Siphoviridae
	NC_023716	53177	Siphoviridae
	NC_009878	52250	Siphoviridae
	NC_023739	51821	Siphoviridae
	NC_023687	53003	Siphoviridae
	NC_002656	50550	Siphoviridae
	NC_004682	50913	Siphoviridae
	NC_008203	52047	Siphoviridae
	NC_001900	49136	Siphoviridae
	NC_023704	51421	Siphoviridae
	NC_023726	53597	Siphoviridae
	NC_011020	50968	Siphoviridae
	NC_011019	53572	Siphoviridae
	NC_023702	52379	Siphoviridae
	NC_001335	52297	Siphoviridae
	NC_023577	51797	Siphoviridae
	NC_011021	51478	Siphoviridae
	NC_013694	51376	Siphoviridae
	NC_023720	53142	Siphoviridae
	NC_011023	52892	Siphoviridae
	NC_025444	53332	Siphoviridae
	NC_023710	50844	Siphoviridae
	NC_023748	53137	Siphoviridae
	NC_011267	49487	Siphoviridae
	NC_017973	52474	Siphoviridae
	NC_023731	53526	Siphoviridae
	NC_023707	53169	Siphoviridae
	NC_009877	51277	Siphoviridae
	NC_023695	52481	Siphoviridae
	NC_016650	48072	Siphoviridae
	NC_004167	39325	Siphoviridae
	NC_004166	44010	Siphoviridae
	NC_013055	39896	Siphoviridae
	NC_004813	57930	Siphoviridae
	NC_009514	47021	Siphoviridae
	NC_019710	40710	Siphoviridae
	NC_019717	45366	Siphoviridae
	NC_019714	39026	Siphoviridae
	NC_019711	47288	Siphoviridae
	NC_019723	47090	Siphoviridae
	NC_019719	41528	Siphoviridae
	NC_019706	42780	Siphoviridae
	NC_019708	37595	Siphoviridae
	NC_019704	44375	Siphoviridae
	NC_019716	44510	Siphoviridae
	NC_019709	41567	Siphoviridae
	NC_019705	38759	Siphoviridae
	NC_021190	46150	Siphoviridae
	NC_019720	44120	Siphoviridae
	NC_019715	39578	Siphoviridae
	NC_019721	40029	Siphoviridae
	NC_016158	49576	Siphoviridae
	NC_016160	36661	Siphoviridae
	NC_028956	52139	Siphoviridae
	NC_028853	50078	Siphoviridae
	NC_028743	48594	Siphoviridae
	NC_018274	36847	Siphoviridae
	NC_024782	36838	Siphoviridae
	NC_005345	49220	Siphoviridae
	NC_011357	62147	Siphoviridae
	NC_002166	40751	Siphoviridae
	NC_002167	39732	Siphoviridae
	NC_001416	48502	Siphoviridae
	NC_008202	42289	Siphoviridae
	NC_023705	41650	Siphoviridae
	NC_024138	65243	Siphoviridae
	NC_031224	59443	Siphoviridae
	NC_001901	46375	Siphoviridae
	NC_024146	56702	Siphoviridae
	NC_029021	60747	Siphoviridae
	NC_029028	60754	Siphoviridae
	NC_028997	59802	Siphoviridae
	NC_031058	58566	Siphoviridae
	NC_023690	110569	Siphoviridae
	NC_004688	110865	Siphoviridae
	NC_023738	106327	Siphoviridae
	NC_028924	48689	Siphoviridae
	NC_028763	49847	Siphoviridae
	NC_018272	35652	Siphoviridae
	NC_018271	35700	Siphoviridae
	NC_009803	84201	Siphoviridae
	NC_009804	83319	Siphoviridae
	NC_021785	65132	Siphoviridae
	NC_024392	66676	Siphoviridae
	NC_024375	67150	Siphoviridae
	NC_021787	64756	Siphoviridae
	NC_018831	67170	Siphoviridae
	NC_027336	29503	Siphoviridae
	NC_027357	29496	Siphoviridae
	NC_027391	29412	Siphoviridae
	NC_027333	29421	Siphoviridae
	NC_027385	29261	Siphoviridae
	NC_027401	29751	Siphoviridae
	NC_027362	29394	Siphoviridae
	NC_027367	29003	Siphoviridae
	NC_027389	29494	Siphoviridae
	NC_027386	29247	Siphoviridae
	NC_027346	29327	Siphoviridae
	NC_027370	29428	Siphoviridae
	NC_027295	29806	Siphoviridae
	NC_027354	29323	Siphoviridae
	NC_018851	29516	Siphoviridae
	NC_018847	29516	Siphoviridae
	NC_027629	28876	Siphoviridae
	NC_027625	29461	Siphoviridae
	NC_027628	29517	Siphoviridae
	NC_027620	29726	Siphoviridae
	NC_027630	29506	Siphoviridae
	NC_018842	29348	Siphoviridae
	NC_018840	29612	Siphoviridae
	NC_018838	29505	Siphoviridae
	NC_018852	29506	Siphoviridae
	NC_018841	29574	Siphoviridae
	NC_018845	29371	Siphoviridae
	NC_018849	29202	Siphoviridae
	NC_018839	29729	Siphoviridae
	NC_018834	29214	Siphoviridae
	NC_009541	29739	Siphoviridae
	NC_027371	29741	Siphoviridae
	NC_015454	29074	Siphoviridae
	NC_015453	29017	Siphoviridae
	NC_022338	29514	Siphoviridae
	NC_022337	29467	Siphoviridae
	NC_022342	29140	Siphoviridae
	NC_022334	29266	Siphoviridae
	NC_022341	29200	Siphoviridae
	NC_022340	29464	Siphoviridae
	NC_027623	29328	Siphoviridae
	NC_027626	29347	Siphoviridae
	NC_027624	29594	Siphoviridae
	NC_027627	29440	Siphoviridae
	NC_027622	29330	Siphoviridae
	NC_027621	29463	Siphoviridae
	NC_028931	55108	Siphoviridae
	NC_028809	58637	Siphoviridae
	NC_023691	70506	Siphoviridae
	NC_008198	64494	Siphoviridae
	NC_023692	48984	Siphoviridae
	NC_028747	47618	Siphoviridae
	NC_023552	47162	Siphoviridae
	NC_021302	47109	Siphoviridae
	NC_026605	46869	Siphoviridae
	NC_028796	49203	Siphoviridae
	NC_023735	76797	Siphoviridae
	NC_023694	78064	Siphoviridae
	NC_014229	37068	Siphoviridae
	NC_004664	41831	Siphoviridae
	NC_001978	41491	Siphoviridae
	NC_019410	221828	Siphoviridae
	NC_019407	218929	Siphoviridae
	NC_019405	215710	Siphoviridae
	NC_019408	223720	Siphoviridae
	NC_019411	219216	Siphoviridae
	NC_028859	42881	Siphoviridae
	NC_028915	43228	Siphoviridae
	NC_028669	43012	Siphoviridae
	NC_004615	43604	Siphoviridae
	NC_007047	39620	Siphoviridae
	NC_007061	42802	Siphoviridae
	NC_007055	43681	Siphoviridae
	NC_007062	41690	Siphoviridae
	NC_007049	43883	Siphoviridae
	NC_007060	41902	Siphoviridae
	NC_007048	42732	Siphoviridae
	NC_007059	43114	Siphoviridae
	NC_030652	42140	Siphoviridae
	NC_009526	43864	Siphoviridae
	NC_007050	44283	Siphoviridae
	NC_007063	43231	Siphoviridae
	NC_007064	42431	Siphoviridae
	NC_007057	43576	Siphoviridae
	NC_008722	43420	Siphoviridae
	NC_007056	45286	Siphoviridae
	NC_018281	43581	Siphoviridae
	NC_018284	42123	Siphoviridae
	NC_011614	42526	Siphoviridae
	NC_008723	44041	Siphoviridae
	NC_003288	43081	Siphoviridae
	NC_008798	43265	Siphoviridae
	NC_008799	43282	Siphoviridae
	NC_010147	43011	Siphoviridae
	NC_010808	44342	Siphoviridae
	NC_028913	43145	Siphoviridae
	NC_028864	43189	Siphoviridae
	NC_014460	41207	Siphoviridae
	NC_007065	43440	Siphoviridae
	NC_013646	38764	Siphoviridae
	NC_013643	36270	Siphoviridae
	NC_013648	39576	Siphoviridae
	NC_019916	38002	Siphoviridae
	NC_006936	36674	Siphoviridae
	NC_016161	38013	Siphoviridae
	NC_021539	38275	Siphoviridae
	NC_015466	62668	Siphoviridae
	NC_016653	46586	Siphoviridae
	NC_018086	53996	Siphoviridae
	NC_024212	55726	Siphoviridae
	NC_021868	58305	Siphoviridae
	NC_022053	70657	Siphoviridae
	NC_018278	42832	Siphoviridae
	NC_007806	42999	Siphoviridae
	NC_024381	43056	Siphoviridae
	NC_017864	42844	Siphoviridae
	NC_028776	59670	Siphoviridae
	NC_027378	56776	Siphoviridae
	NC_023582	92417	Siphoviridae
	NC_024355	93794	Siphoviridae
	NC_007019	34704	Siphoviridae
	NC_010353	35543	Siphoviridae
	NC_013598	35525	Siphoviridae
	NC_004303	43075	Siphoviridae
	NC_002214	39807	Siphoviridae
	NC_002185	35466	Siphoviridae
	NC_002072	34815	Siphoviridae
	NC_013645	34882	Siphoviridae
	NC_000871	37370	Siphoviridae
	NC_000872	40739	Siphoviridae
	NC_028788	37246	Siphoviridae
	NC_028758	35644	Siphoviridae
	NC_029084	37990	Siphoviridae
	NC_028854	43724	Siphoviridae
	NC_028851	37995	Siphoviridae
	NC_008370	30510	Siphoviridae
	NC_017688	32414	Siphoviridae
	NC_011046	29305	Siphoviridae
	NC_001909	31754	Siphoviridae
	NC_013155	32182	Siphoviridae
	NC_013152	29459	Siphoviridae
	NC_008371	27453	Siphoviridae
	NC_008363	28538	Siphoviridae
	NC_001835	28451	Siphoviridae
	NC_028900	28144	Siphoviridae
	NC_022774	80382	Siphoviridae
	NC_028856	80148	Siphoviridae
	NC_022767	81656	Siphoviridae
	NC_028777	80798	Siphoviridae
	NC_030936	93843	Siphoviridae
	NC_030901	92618	Siphoviridae
	NC_030917	93577	Siphoviridae
	NC_030696	93139	Siphoviridae
	NC_030698	52924	Siphoviridae
	NC_029119	127726	Siphoviridae
	NC_001884	134416	Siphoviridae
	NC_019713	78751	Siphoviridae
	NC_031933	114180	Siphoviridae
	NC_031022	108050	Siphoviridae
	NC_028895	116138	Siphoviridae
	NC_019529	111506	Siphoviridae
	NC_017969	108853	Siphoviridae
	NC_027356	108065	Siphoviridae
	NC_010583	111382	Siphoviridae
	NC_024139	108483	Siphoviridae
	NC_028840	111751	Siphoviridae
	NC_005859	121750	Siphoviridae
	NC_031902	125114	Siphoviridae
	NC_028754	120098	Siphoviridae
	NC_015269	118351	Siphoviridae
	NC_027297	123475	Siphoviridae
	NC_028865	76964	Siphoviridae
	NC_028966	76269	Siphoviridae
	NC_029097	44496	Siphoviridae
	NC_014458	59598	Siphoviridae
	NC_014459	59798	Siphoviridae
	NC_027365	58076	Siphoviridae
	NC_023724	62991	Siphoviridae
	NC_003387	52797	Siphoviridae
	NC_019912	36932	Siphoviridae
	NC_007053	43095	Siphoviridae
	NC_007052	45861	Siphoviridae
	NC_007054	44777	Siphoviridae
	NC_011612	45344	Siphoviridae
	NC_004616	44970	Siphoviridae
	NC_002661	42942	Siphoviridae
	NC_028786	49462	Siphoviridae
	NC_028760	49037	Siphoviridae
	NC_029099	49797	Siphoviridae
	NC_031053	50934	Siphoviridae
	NC_028774	48754	Siphoviridae
	NC_024793	46847	Siphoviridae
	NC_024784	46440	Siphoviridae
	NC_024789	45746	Siphoviridae
	NC_024210	47112	Siphoviridae
	NC_023743	47180	Siphoviridae
	NC_007291	46072	Siphoviridae
	NC_019718	45805	Siphoviridae
	NC_019404	46054	Siphoviridae
	NC_007603	46219	Siphoviridae
	NC_019509	49116	Siphoviridae
	NC_019725	50552	Siphoviridae
	NC_005833	48836	Siphoviridae
	NC_026010	50109	Siphoviridae
	NC_015456	50661	Siphoviridae
	NC_027350	49816	Siphoviridae
	NC_009540	49902	Siphoviridae
	NC_028767	45653	Siphoviridae
	NC_030927	45858	Siphoviridae
	NC_030911	45858	Siphoviridae
	NC_007734	40867	Siphoviridae
	NC_031229	76972	Siphoviridae
	NC_030924	75680	Siphoviridae
	NC_030905	73752	Siphoviridae
	NC_019933	43870	Siphoviridae
	NC_007709	43785	Siphoviridae
	NC_012742	44080	Siphoviridae
	NC_009543	44520	Siphoviridae
	NC_004902	44373	Siphoviridae
	NC_028818	57168	Siphoviridae
	NC_028974	56528	Siphoviridae
	NC_006938	63649	Siphoviridae
	NC_007809	59446	Siphoviridae
	NC_018282	61167	Siphoviridae
	NC_028980	62181	Siphoviridae
	NC_010116	58663	Siphoviridae
	NC_029075	81541	Siphoviridae
	NC_029033	45045	Siphoviridae
	NC_029106	62220	Siphoviridae
	NC_023590	43050	Siphoviridae
	NC_031098	40749	Siphoviridae
	NC_005885	58638	Siphoviridae
	NC_008695	42271	Siphoviridae
	NC_022972	37372	Siphoviridae
	NC_010355	62337	Siphoviridae
	NC_006557	41092	Siphoviridae
	NC_018085	41992	Siphoviridae
	NC_007814	37974	Siphoviridae
	NC_007458	37253	Siphoviridae
	NC_017976	41164	Siphoviridae
	NC_031055	43773	Siphoviridae
	NC_028886	38663	Siphoviridae
	NC_029008	41486	Siphoviridae
	NC_023599	38772	Siphoviridae
	NC_019502	44401	Siphoviridae
	NC_020883	50861	Siphoviridae
	NC_023007	168876	Siphoviridae
	NC_030904	38975	Siphoviridae
	NC_028748	51366	Siphoviridae
	NC_025424	45648	Siphoviridae
	NC_011645	37456	Siphoviridae
	NC_028841	44952	Siphoviridae
	NC_016770	47159	Siphoviridae
	NC_011222	44929	Siphoviridae
	NC_028749	134270	Siphoviridae
	NC_015254	41518	Siphoviridae
	NC_015252	36953	Siphoviridae
	NC_018283	58065	Siphoviridae
	NC_007497	44856	Siphoviridae
	NC_009447	52414	Siphoviridae
	NC_005091	57455	Siphoviridae
	NC_019406	279967	Siphoviridae
	NC_021802	53664	Siphoviridae
	NC_021799	57447	Siphoviridae
	NC_021804	28760	Siphoviridae
	NC_021800	34844	Siphoviridae
	NC_013698	58652	Siphoviridae
	NC_023549	56789	Siphoviridae
	NC_003524	33507	Siphoviridae
	NC_019924	47595	Siphoviridae
	NC_028905	41560	Siphoviridae
	NC_028958	41507	Siphoviridae
	NC_015568	41090	Siphoviridae
	NC_015262	37664	Siphoviridae
	NC_019506	38329	Siphoviridae
	NC_019496	39188	Siphoviridae
	NC_019508	38309	Siphoviridae
	NC_011318	38753	Siphoviridae
	NC_029004	36712	Siphoviridae
	NC_014457	59199	Siphoviridae
	NC_017978	33609	Siphoviridae
	NC_008265	38092	Siphoviridae
	NC_021325	39108	Siphoviridae
	NC_018088	104936	Siphoviridae
	NC_009799	42972	Siphoviridae
	NC_009816	70579	Siphoviridae
	NC_018276	44988	Siphoviridae
	NC_023614	43153	Siphoviridae
	NC_019934	39012	Siphoviridae
	NC_018454	39974	Siphoviridae
	NC_013021	107530	Siphoviridae
	NC_019524	60364	Siphoviridae
	NC_028695	40491	Siphoviridae
	NC_006949	46900	Siphoviridae
	NC_019768	41468	Siphoviridae
	NC_019769	38964	Siphoviridae
	NC_019767	40155	Siphoviridae
	NC_031050	51802	Siphoviridae
	NC_031260	41170	Siphoviridae
	NC_025465	40923	Siphoviridae
	NC_012419	21115	Siphoviridae
	NC_025453	40286	Siphoviridae
	NC_015270	16945	Siphoviridae
	NC_023595	41687	Siphoviridae
	NC_023551	40692	Siphoviridae
	NC_024356	42597	Siphoviridae
	NC_028826	42265	Siphoviridae
	NC_013696	42822	Siphoviridae
	NC_013644	37856	Siphoviridae
	NC_031051	37933	Siphoviridae
	NC_028990	38886	Siphoviridae
	NC_028671	41307	Siphoviridae
	NC_029016	58000	Siphoviridae
	NC_023610	218339	Siphoviridae
	NC_019929	243050	Siphoviridae
	NC_029078	34997	Siphoviridae
	NC_031081	45206	Siphoviridae
	NC_031113	44513	Siphoviridae
	NC_028831	61235	Siphoviridae
	NC_028901	43900	Siphoviridae
	NC_006356	36012	Siphoviridae
	NC_023612	39078	Siphoviridae
	NC_029073	141298	Siphoviridae
	NC_031074	92580	Siphoviridae
	NC_031226	53717	Siphoviridae
	NC_031247	50636	Siphoviridae
	NC_030943	54990	Siphoviridae
	NC_030930	46570	Siphoviridae
	NC_030942	55524	Siphoviridae
	NC_031072	47898	Siphoviridae
	NC_031118	54167	Siphoviridae
	NC_030941	46600	Siphoviridae
	NC_031029	93686	Siphoviridae
	NC_031234	43982	Siphoviridae
	NC_031122	44929	Siphoviridae
	NC_031936	49979	Siphoviridae
	NC_031028	45285	Siphoviridae
	NC_030902	41207	Siphoviridae
	NC_030939	45537	Siphoviridae
	NC_030907	17562	Siphoviridae
	NC_030906	83324	Siphoviridae
	NC_028972	75167	Siphoviridae
	NC_029060	76276	Siphoviridae
	NC_016435	65766	Siphoviridae
	NC_030935	17727	Siphoviridae
	NC_030932	43505	Siphoviridae
	NC_015720	45530	Siphoviridae
	NC_016434	65839	Siphoviridae
	NC_016166	74431	Siphoviridae
	NC_031265	49894	Siphoviridae
	NC_031099	44536	Siphoviridae
	NC_031060	52726	Siphoviridae
	NC_031109	78302	Siphoviridae
	NC_030695	52689	Siphoviridae
	NC_031233	50346	Siphoviridae
	NC_031267	42979	Siphoviridae
	NC_030912	17119	Siphoviridae
	NC_031004	41857	Siphoviridae
	NC_031061	53431	Siphoviridae
	NC_031237	49286	Siphoviridae
	NC_030915	80650	Siphoviridae
	NC_031112	59265	Siphoviridae
	NC_031031	52738	Siphoviridae
	NC_030694	52684	Siphoviridae
	NC_031255	46895	Siphoviridae
	NC_031251	47880	Siphoviridae
	NC_031001	66611	Siphoviridae
	NC_031052	57804	Siphoviridae
	NC_031249	50127	Siphoviridae
	NC_030921	49768	Siphoviridae
	NC_031239	59337	Siphoviridae
	NC_030913	58308	Siphoviridae
	NC_031269	51884	Siphoviridae
	NC_031230	98136	Siphoviridae
	NC_031097	52077	Siphoviridae
	NC_016568	24645	Siphoviridae
	NC_025471	36844	Siphoviridae
	NC_005857	51601	Siphoviridae
	NC_004112	43411	Siphoviridae
	NC_028888	39474	Siphoviridae
	NC_028835	38751	Siphoviridae
	NC_028830	34155	Siphoviridae
	NC_028911	34176	Siphoviridae
	NC_028783	39399	Siphoviridae
	NC_022756	40931	Siphoviridae
	NC_019456	49433	Siphoviridae
	NC_005893	39166	Siphoviridae
	NC_007501	36466	Siphoviridae
	NC_026609	74806	Siphoviridae
	NC_019486	42606	Siphoviridae
	NC_029068	31703	Siphoviridae
	NC_009554	34659	Siphoviridae
	NC_011104	39989	Siphoviridae
	NC_011801	38934	Siphoviridae
	NC_000896	43785	Siphoviridae
	NC_004305	42259	Siphoviridae
	NC_022775	36969	Siphoviridae
	NC_027982	32847	Siphoviridae
	NC_022757	38880	Siphoviridae
	NC_031036	35068	Siphoviridae
	NC_031125	41005	Siphoviridae
	NC_019489	41726	Siphoviridae
	NC_005354	38384	Siphoviridae
	NC_005355	40190	Siphoviridae
	NC_027120	36892	Siphoviridae
	NC_010576	55597	Siphoviridae
	NC_031013	34396	Siphoviridae
	NC_021853	32337	Siphoviridae
	NC_031040	31987	Siphoviridae
	NC_031017	32409	Siphoviridae
	NC_008364	26537	Siphoviridae
	NC_015263	114768	Siphoviridae
	NC_031064	36202	Siphoviridae
	NC_002666	35538	Siphoviridae
	NC_002667	41834	Siphoviridae
	NC_002668	36949	Siphoviridae
	NC_002669	14957	Siphoviridae
	NC_002670	14510	Siphoviridae
	NC_002671	15179	Siphoviridae
	NC_002796	40003	Siphoviridae
	NC_021861	30910	Siphoviridae
	NC_029118	24847	Siphoviridae
	NC_021860	31090	Siphoviridae
	NC_021854	28674	Siphoviridae
	NC_024215	54452	Siphoviridae
	NC_012663	60074	Siphoviridae
	NC_024203	53513	Siphoviridae
	NC_024208	54173	Siphoviridae
	NC_024214	55584	Siphoviridae
	NC_004746	36596	Siphoviridae
	NC_021852	29631	Siphoviridae
	NC_021855	32382	Siphoviridae
	NC_023574	128546	Siphoviridae
	NC_005822	32172	Siphoviridae
	NC_031016	40273	Siphoviridae
	NC_004302	33350	Siphoviridae
	NC_002747	37667	Siphoviridae
	NC_002703	38347	Siphoviridae
	NC_004066	36798	Siphoviridae
	NC_027341	130008	Siphoviridae
	NC_027987	29508	Siphoviridae
	NC_018273	26201	Siphoviridae
	NC_027377	28921	Siphoviridae
	NC_027358	28527	Siphoviridae
	NC_020880	26769	Siphoviridae
	NC_024390	26752	Siphoviridae
	NC_020870	25865	Siphoviridae
	NC_024385	28193	Siphoviridae
	NC_024386	28427	Siphoviridae
	NC_024388	28022	Siphoviridae
	NC_024380	25740	Siphoviridae
	NC_024389	28336	Siphoviridae
	NC_024378	28015	Siphoviridae
	NC_003291	37618	Siphoviridae
	NC_009815	38124	Siphoviridae
	NC_003216	40834	Siphoviridae
	NC_009810	38867	Siphoviridae
	NC_009812	42653	Siphoviridae
	NC_009813	48172	Siphoviridae
	NC_024384	41156	Siphoviridae
	NC_024387	43767	Siphoviridae
	NC_009814	35822	Siphoviridae
	NC_011308	35638	Siphoviridae
	NC_028871	38392	Siphoviridae
	NC_028929	40759	Siphoviridae
	NC_006953	37966	Siphoviridae
	NC_001902	26111	Siphoviridae
	NC_002628	31007	Siphoviridae
	NC_009603	46365	Siphoviridae
	NC_023859	59254	Siphoviridae
	NC_023597	53124	Siphoviridae
	NC_023602	50781	Siphoviridae
	NC_023603	71565	Siphoviridae
	NC_023607	53396	Siphoviridae
	NC_028920	52530	Siphoviridae
	NC_023591	95705	Siphoviridae
	NC_022058	52519	Siphoviridae
	NC_023723	53684	Siphoviridae
	NC_023862	52136	Siphoviridae
	NC_026583	49577	Siphoviridae
	NC_012788	41441	Siphoviridae
	NC_022087	53253	Siphoviridae
	NC_031277	52561	Siphoviridae
	NC_028878	76271	Siphoviridae
	NC_028876	109801	Siphoviridae
	NC_031279	52129	Siphoviridae
	NC_023747	59672	Siphoviridae
	NC_028804	52643	Siphoviridae
	NC_028823	58985	Siphoviridae
	NC_031253	77832	Siphoviridae
	NC_023713	52288	Siphoviridae
	NC_022055	59179	Siphoviridae
	NC_031262	54751	Siphoviridae
	NC_022988	74210	Siphoviridae
	NC_021533	45942	Siphoviridae
	NC_021061	41491	Siphoviridae
	NC_026593	59419	Siphoviridae
	NC_028678	56669	Siphoviridae
	NC_028922	45161	Siphoviridae
	NC_028842	57328	Siphoviridae
	NC_028779	43680	Siphoviridae
	NC_021324	53369	Siphoviridae
	NC_031238	53411	Siphoviridae
	NC_022057	72108	Siphoviridae
	NC_026604	53636	Siphoviridae
	NC_028897	49421	Siphoviridae
	NC_028979	57253	Siphoviridae
	NC_021338	46639	Siphoviridae
	NC_021318	51214	Siphoviridae
	NC_022973	50755	Siphoviridae
	NC_022065	74533	Siphoviridae
	NC_023606	52963	Siphoviridae
	NC_022071	76129	Siphoviridae
	NC_022068	58043	Siphoviridae
	NC_024371	68386	Siphoviridae
	NC_028946	59652	Siphoviridae
	NC_011022	51621	Siphoviridae
	NC_023703	64613	Siphoviridae
	NC_022059	77367	Siphoviridae
	NC_023708	51083	Siphoviridae
	NC_023744	60588	Siphoviridae
	NC_021306	75736	Siphoviridae
	NC_022325	69815	Siphoviridae
	NC_023562	51236	Siphoviridae
	NC_023564	52974	Siphoviridae
	NC_023553	53159	Siphoviridae
	NC_029059	51492	Siphoviridae
	NC_028936	59052	Siphoviridae
	NC_028852	53042	Siphoviridae
	NC_026585	60727	Siphoviridae
	NC_031263	53935	Siphoviridae
	NC_020876	53028	Siphoviridae
	NC_028861	44576	Siphoviridae
	NC_028889	59416	Siphoviridae
	NC_022753	52282	Siphoviridae
	NC_031124	76012	Siphoviridae
	NC_031035	61626	Siphoviridae
	NC_022085	76483	Siphoviridae
	NC_031111	53623	Siphoviridae
	NC_022979	52823	Siphoviridae
	NC_011290	64807	Siphoviridae
	NC_026595	54986	Siphoviridae
	NC_022056	57155	Siphoviridae
	NC_022975	52390	Siphoviridae
	NC_024209	67383	Siphoviridae
	NC_021308	52617	Siphoviridae
	NC_024145	70667	Siphoviridae
	NC_022981	76323	Siphoviridae
	NC_026596	57052	Siphoviridae
	NC_028687	51637	Siphoviridae
	NC_022069	55213	Siphoviridae
	NC_021538	59626	Siphoviridae
	NC_021535	50679	Siphoviridae
	NC_023600	71058	Siphoviridae
	NC_023604	44306	Siphoviridae
	NC_022984	51319	Siphoviridae
	NC_024141	51378	Siphoviridae
	NC_022061	70838	Siphoviridae
	NC_026603	61251	Siphoviridae
	NC_028792	56826	Siphoviridae
	NC_028947	62738	Siphoviridae
	NC_028744	53141	Siphoviridae
	NC_024143	53255	Siphoviridae
	NC_028877	52967	Siphoviridae
	NC_021556	39981	Siphoviridae
	NC_023689	76260	Siphoviridae
	NC_022086	50690	Siphoviridae
	NC_028923	58472	Siphoviridae
	NC_028843	75816	Siphoviridae
	NC_031256	53486	Siphoviridae
	NC_028849	53387	Siphoviridae
	NC_031067	52496	Siphoviridae
	NC_028953	110764	Siphoviridae
	NC_023572	42240	Siphoviridae
	NC_026598	58211	Siphoviridae
	NC_029093	75796	Siphoviridae
	NC_026584	109871	Siphoviridae
	NC_028791	44492	Siphoviridae
	NC_028759	58065	Siphoviridae
	NC_031257	52428	Siphoviridae
	NC_021305	76179	Siphoviridae
	NC_028978	60609	Siphoviridae
	NC_022976	75894	Siphoviridae
	NC_028785	72790	Siphoviridae
	NC_028928	53455	Siphoviridae
	NC_028815	51355	Siphoviridae
	NC_023565	51250	Siphoviridae
	NC_023578	69099	Siphoviridae
	NC_024366	62661	Siphoviridae
	NC_028832	61511	Siphoviridae
	NC_028937	58338	Siphoviridae
	NC_031281	43516	Siphoviridae
	NC_031041	52501	Siphoviridae
	NC_028874	50614	Siphoviridae
	NC_021297	52057	Siphoviridae
	NC_021299	80955	Siphoviridae
	NC_028680	50515	Siphoviridae
	NC_011057	68090	Siphoviridae
	NC_024148	50101	Siphoviridae
	NC_022969	76217	Siphoviridae
	NC_028844	57293	Siphoviridae
	NC_021311	76479	Siphoviridae
	NC_012027	69378	Siphoviridae
	NC_031266	44872	Siphoviridae
	NC_022329	53636	Siphoviridae
	NC_021309	74711	Siphoviridae
	NC_024368	50610	Siphoviridae
	NC_028965	53219	Siphoviridae
	NC_028794	52647	Siphoviridae
	NC_008200	64787	Siphoviridae
	NC_028961	55094	Siphoviridae
	NC_028751	58671	Siphoviridae
	NC_022330	76586	Siphoviridae
	NC_022066	108297	Siphoviridae
	NC_023609	46739	Siphoviridae
	NC_028810	52357	Siphoviridae
	NC_023580	57775	Siphoviridae
	NC_022324	53701	Siphoviridae
	NC_026589	55832	Siphoviridae
	NC_024136	51781	Siphoviridae
	NC_028813	57766	Siphoviridae
	NC_028932	52088	Siphoviridae
	NC_021307	49894	Siphoviridae
	NC_028846	61081	Siphoviridae
	NC_028914	52927	Siphoviridae
	NC_031261	48670	Siphoviridae
	NC_021301	56279	Siphoviridae
	NC_031102	42429	Siphoviridae
	NC_028778	75626	Siphoviridae
	NC_028654	56275	Siphoviridae
	NC_026597	63334	Siphoviridae
	NC_026588	60285	Siphoviridae
	NC_029043	53184	Siphoviridae
	NC_028912	49717	Siphoviridae
	NC_028784	51409	Siphoviridae
	NC_028960	51543	Siphoviridae
	NC_028828	52055	Siphoviridae
	NC_026591	44716	Siphoviridae
	NC_011285	64618	Siphoviridae
	NC_022062	52102	Siphoviridae
	NC_028941	51161	Siphoviridae
	NC_028802	49158	Siphoviridae
	NC_023498	62466	Siphoviridae
	NC_022060	54314	Siphoviridae
	NC_029077	52155	Siphoviridae
	NC_028801	68346	Siphoviridae
	NC_022067	109960	Siphoviridae
	NC_022070	53588	Siphoviridae
	NC_022052	76050	Siphoviridae
	NC_023709	51308	Siphoviridae
	NC_021334	53359	Siphoviridae
	NC_031243	42395	Siphoviridae
	NC_028910	55617	Siphoviridae
	NC_022965	52873	Siphoviridae
	NC_022985	52122	Siphoviridae
	NC_022977	52344	Siphoviridae
	NC_024147	57315	Siphoviridae
	NC_028742	70270	Siphoviridae
	NC_008206	78296	Siphoviridae
	NC_016569	46140	Siphoviridae
	NC_021558	37644	Siphoviridae
	NC_028930	54439	Siphoviridae
	NC_028837	41149	Siphoviridae
	NC_026608	42093	Siphoviridae
	NC_018837	122024	Siphoviridae
	NC_031084	29249	Siphoviridae
	NC_031119	29347	Siphoviridae
	NC_031003	29254	Siphoviridae
	NC_028694	29407	Siphoviridae
	NC_028967	29605	Siphoviridae
	NC_022336	29511	Siphoviridae
	NC_027373	29423	Siphoviridae
	NC_027400	29264	Siphoviridae
	NC_022335	29377	Siphoviridae
	NC_027359	29491	Siphoviridae
	NC_027361	29454	Siphoviridae
	NC_027294	29438	Siphoviridae
	NC_031005	29338	Siphoviridae
	NC_028812	58546	Siphoviridae
	NC_015293	30651	Siphoviridae
	NC_029100	33399	Siphoviridae
	NC_006548	38439	Siphoviridae
[truncated: 5,383 more rows]
