# Supplementary material for: An efficient numerical representation of genome sequence: natural vector with covariance component
Source: PeerJ. 2022 Jun 16;10:e13544. doi: 10.7717/peerj.13544 (PMC9206847; doi:10.7717/peerj.13544)
Supplement: Supplemental Information 4 [file peerj-10-13544-s004.xlsx]

## Sheet: Data S5 | Giant Virus
	Accession number	Sequence Length	Family name
	NC_042699	77109	Agaricomycetidae
	NC_042769	93439	Agaricomycetidae
	NC_045203	39109	Agaricomycetidae
	NC_054202	44054	Agaricomycetidae
	NC_054201	43990	Agaricomycetidae
	NC_056808	39362	Agaricomycetidae
	NC_045194	52733	Agaricomycetidae
	NC_045195	37341	Agaricomycetidae
	NC_045196	76761	Agaricomycetidae
	NC_045197	62533	Agaricomycetidae
	NC_045198	59691	Agaricomycetidae
	NC_045199	62233	Agaricomycetidae
	NC_045200	101106	Agaricomycetidae
	NC_045201	137428	Agaricomycetidae
	NC_038224	73678	Agaricomycetidae
	NC_038223	50643	Agaricomycetidae
	NC_039439	43328	Agaricomycetidae
	NC_039441	99774	Agaricomycetidae
	NC_039442	126794	Agaricomycetidae
	NC_039443	65087	Agaricomycetidae
	NC_042219	102752	Agaricomycetidae
	NC_042229	103563	Agaricomycetidae
	NC_042231	122167	Agaricomycetidae
	NC_021373	88508	Agaricomycetidae
	NC_009905	73242	Agaricomycetidae
	NC_033533	72650	Agaricomycetidae
	NC_036998	60694	Agaricomycetidae
	NC_036999	73807	Agaricomycetidae
	NC_028135	76037	Agaricomycetidae
	NC_039440	200401	Agaricomycetidae
	NC_042772	65156	Agaricomycetidae
	NC_042773	95304	Agaricomycetidae
	NC_046500	80705	Agaricomycetidae
	NC_046501	49480	Agaricomycetidae
	NC_046499	103090	Agaricomycetidae
	NC_046502	94261	Agaricomycetidae
	NC_022435	90840	Debaryomycetaceae
	NC_022173	32053	Debaryomycetaceae
	NC_022176	77153	Debaryomycetaceae
	NC_022434	69218	Debaryomycetaceae
	NC_005253	32745	Debaryomycetaceae
	NC_036103	38445	Debaryomycetaceae
	NC_011133	32141	Debaryomycetaceae
	NC_013255	39107	Debaryomycetaceae
	NC_002653	40420	Debaryomycetaceae
	NC_013809	39242	Debaryomycetaceae
	NC_013830	62949	Debaryomycetaceae
	NC_013839	39415	Debaryomycetaceae
	NC_014337	29795	Debaryomycetaceae
	NC_014612	30368	Debaryomycetaceae
	NC_014693	29672	Debaryomycetaceae
	NC_015814	37215	Debaryomycetaceae
	NC_006972	22528	Debaryomycetaceae
	NC_006971	24152	Debaryomycetaceae
	NC_018046	33928	Debaryomycetaceae
	NC_022152	32135	Debaryomycetaceae
	NC_022153	46389	Debaryomycetaceae
	NC_022156	33625	Debaryomycetaceae
	NC_022157	52426	Debaryomycetaceae
	NC_022162	62593	Debaryomycetaceae
	NC_022168	26205	Debaryomycetaceae
	NC_022169	26234	Debaryomycetaceae
	NC_022170	39443	Debaryomycetaceae
	NC_022172	46389	Debaryomycetaceae
	NC_022174	55125	Debaryomycetaceae
	NC_022154	31070	Debaryomycetaceae
	NC_022160	54610	Debaryomycetaceae
	NC_020043	42757	Dipodascaceae
	NC_024093	37684	Dipodascaceae
	NC_024094	44469	Dipodascaceae
	NC_024095	43486	Dipodascaceae
	NC_016126	28017	Dipodascaceae
	NC_058213	49739	Dipodascaceae
	NC_058229	41214	Dipodascaceae
	NC_002659	47916	Dipodascaceae
	NC_016124	35173	Dipodascaceae
	NC_016130	40665	Dipodascaceae
	NC_023127	49539	Dothideomycetidae
	NC_037198	49363	Dothideomycetidae
	NC_030334	23743	Dothideomycetidae
	NC_050879	35706	Dothideomycetidae
	NC_010222	43964	Dothideomycetidae
	NC_056147	188623	Erysiphaceae
	NC_056146	188577	Erysiphaceae
	NC_056148	332165	Erysiphaceae
	NC_012826	24297	Eurotiomycetidae
	NC_012828	28530	Eurotiomycetidae
	NC_012830	24105	Eurotiomycetidae
	NC_012824	26985	Eurotiomycetidae
	NC_012832	23943	Eurotiomycetidae
	NC_007394	30910	Eurotiomycetidae
	NC_030172	28192	Eurotiomycetidae
	NC_040166	31228	Eurotiomycetidae
	NC_017896	33227	Eurotiomycetidae
	NC_041427	53882	Eurotiomycetidae
	NC_041445	29141	Eurotiomycetidae
	NC_047444	27537	Eurotiomycetidae
	NC_025570	33007	Eurotiomycetidae
	NC_054159	77649	Eurotiomycetidae
	NC_026920	31602	Eurotiomycetidae
	NC_027416	29908	Eurotiomycetidae
	NC_008282	29202	Eurotiomycetidae
	NC_015080	28978	Eurotiomycetidae
	NC_016187	28601	Eurotiomycetidae
	NC_017016	30696	Eurotiomycetidae
	NC_018100	29192	Eurotiomycetidae
	NW_003020062	8770	Eurotiomycetidae
	NW_003020063	1588	Eurotiomycetidae
	NW_003020071	1668	Eurotiomycetidae
	NW_003020072	1268	Eurotiomycetidae
	NW_003020084	1072	Eurotiomycetidae
	NW_003020085	1439	Eurotiomycetidae
	NW_003020086	1211	Eurotiomycetidae
	NW_003020087	1263	Eurotiomycetidae
	NW_003020088	1420	Eurotiomycetidae
	NW_003020089	1473	Eurotiomycetidae
	NW_003020090	1046	Eurotiomycetidae
	NW_003020091	1704	Eurotiomycetidae
	NW_003020093	1381	Eurotiomycetidae
	NW_003020094	1032	Eurotiomycetidae
	NW_003020095	1207	Eurotiomycetidae
	NW_003020096	1628	Eurotiomycetidae
	NW_003020098	1453	Eurotiomycetidae
	NW_003020100	1903	Eurotiomycetidae
	NW_003020102	1243	Eurotiomycetidae
	NW_003020103	1534	Eurotiomycetidae
	NW_003020104	1375	Eurotiomycetidae
	NW_003020106	1253	Eurotiomycetidae
	NW_003020107	1550	Eurotiomycetidae
	NW_003020108	31790	Eurotiomycetidae
	NC_022144	59633	Glomeraceae
	NC_029185	72251	Glomeraceae
	NC_012056	70606	Glomeraceae
	NC_039931	112060	Hymenochaetaceae
	NC_044675	144970	Hymenochaetaceae
	NC_044676	115036	Hymenochaetaceae
	NC_044677	45604	Hymenochaetaceae
	NC_044678	58959	Hymenochaetaceae
	NC_044740	119110	Hymenochaetaceae
	NC_050862	97345	Hymenochaetaceae
	NC_032063	84630	Hypocreomycetidae
	NC_032064	88744	Hypocreomycetidae
	NC_043850	27480	Hypocreomycetidae
	NC_047289	62514	Hypocreomycetidae
	NC_049079	23794	Hypocreomycetidae
	NW_025064823	98050	Hypocreomycetidae
	NC_057480	68425	Hypocreomycetidae
	NC_022835	25615	Hypocreomycetidae
	NC_008068	24673	Hypocreomycetidae
	NC_022834	33277	Hypocreomycetidae
	NC_022708	28006	Hypocreomycetidae
	NC_028330	25919	Hypocreomycetidae
	NC_030635	44135	Hypocreomycetidae
	NC_032302	28081	Hypocreomycetidae
	NC_041489	56581	Hypocreomycetidae
	NC_046840	24643	Hypocreomycetidae
	NC_053825	59014	Hypocreomycetidae
	NC_010652	29961	Hypocreomycetidae
	NC_011194	33926	Hypocreomycetidae
	NC_004514	24499	Hypocreomycetidae
	NC_023540	36957	Hypocreomycetidae
	NC_027280	30892	Hypocreomycetidae
	NC_030052	30020	Hypocreomycetidae
	NC_035496	33950	Hypocreomycetidae
	NC_029213	36554	Hypocreomycetidae
	NC_030206	71638	Hypocreomycetidae
	NC_036144	32763	Hypocreomycetidae
	NC_037075	29999	Hypocreomycetidae
	NC_003388	42130	Hypocreomycetidae
	NC_030218	29303	Hypocreomycetidae
	NC_048477	32758	Hypocreomycetidae
	NC_052832	29791	Hypocreomycetidae
	NC_054243	78529	Hypocreomycetidae
	NC_023268	27266	Hypocreomycetidae
	NC_027660	52245	Hypocreomycetidae
	NC_029238	26139	Hypocreomycetidae
	NC_029851	24565	Hypocreomycetidae
	NC_031384	35159	Hypocreomycetidae
	NC_034659	157539	Hypocreomycetidae
	NC_036610	53793	Hypocreomycetidae
	NC_036382	25328	Hypocreomycetidae
	NC_040165	62509	Hypocreomycetidae
	NC_030164	62483	Hypocreomycetidae
	NC_044963	103403	Hypocreomycetidae
	NC_045185	102548	Hypocreomycetidae
	NC_046839	34698	Hypocreomycetidae
	NC_049089	66785	Hypocreomycetidae
	NC_054274	46102	Hypocreomycetidae
	NC_056378	23495	Hypocreomycetidae
	NC_056159	121288	Hypocreomycetidae
	NC_056156	159132	Hypocreomycetidae
	NC_020430	103147	Hypocreomycetidae
	NC_030340	42895	Hypocreomycetidae
	NC_030252	69895	Hypocreomycetidae
	NC_025928	93428	Hypocreomycetidae
	NC_022681	67109	Hypocreomycetidae
	NC_044490	63593	Hypocreomycetidae
	NC_046566	110525	Hypocreomycetidae
	NC_046567	93160	Hypocreomycetidae
	NC_046826	39891	Hypocreomycetidae
	NC_009493	95676	Hypocreomycetidae
	NC_026993	103844	Hypocreomycetidae
	NC_016680	62978	Hypocreomycetidae
	NC_016687	53753	Hypocreomycetidae
	NC_030051	39842	Lecanoromycetidae
	NC_031804	51156	Lecanoromycetidae
	NC_034332	73992	Lecanoromycetidae
	NC_034786	84295	Lecanoromycetidae
	NC_034779	39591	Lecanoromycetidae
	NC_034928	120920	Lecanoromycetidae
	NC_035550	32029	Lecanoromycetidae
	NC_035730	38888	Lecanoromycetidae
	NC_035940	65539	Lecanoromycetidae
	NC_036309	59116	Lecanoromycetidae
	NC_037233	75417	Lecanoromycetidae
	NC_039132	45312	Lecanoromycetidae
	NC_039163	76322	Lecanoromycetidae
	NC_039372	50682	Lecanoromycetidae
	NC_039722	59878	Lecanoromycetidae
	NC_039662	50045	Lecanoromycetidae
	NC_039663	53100	Lecanoromycetidae
	NC_040007	79456	Lecanoromycetidae
	NC_042183	56579	Lecanoromycetidae
	NC_042184	32357	Lecanoromycetidae
	NC_042185	84088	Lecanoromycetidae
	NC_042413	49698	Lecanoromycetidae
	NC_042822	46553	Lecanoromycetidae
	NC_044483	30678	Lecanoromycetidae
	NC_040159	75318	Lecanoromycetidae
	NC_016955	63363	Lecanoromycetidae
	NC_016957	62785	Lecanoromycetidae
	NC_050172	52527	Metschnikowiaceae
	NC_050302	62609	Metschnikowiaceae
	NC_050303	55476	Metschnikowiaceae
	NC_050304	187475	Metschnikowiaceae
	NC_050305	116310	Metschnikowiaceae
	NC_050338	113475	Metschnikowiaceae
	NC_050339	121495	Metschnikowiaceae
	NC_050342	79835	Metschnikowiaceae
	NC_050343	61425	Metschnikowiaceae
	NC_050344	92261	Metschnikowiaceae
	NC_050374	76321	Metschnikowiaceae
	NC_050375	105181	Metschnikowiaceae
	NC_050376	96587	Metschnikowiaceae
	NC_050377	69221	Metschnikowiaceae
	NC_050378	81198	Metschnikowiaceae
	NC_050379	81062	Metschnikowiaceae
	NC_050380	77864	Metschnikowiaceae
	NC_050381	75407	Metschnikowiaceae
	NC_050382	82136	Metschnikowiaceae
	NC_050301	43542	Metschnikowiaceae
	NC_050837	33454	Metschnikowiaceae
	NC_050838	132631	Metschnikowiaceae
	NC_050839	48347	Metschnikowiaceae
	NC_050840	33514	Metschnikowiaceae
	NC_050841	24050	Metschnikowiaceae
	NC_050842	56695	Metschnikowiaceae
	NC_050843	35585	Metschnikowiaceae
	NC_050844	93037	Metschnikowiaceae
	NC_050845	99200	Metschnikowiaceae
	NC_050846	67292	Metschnikowiaceae
	NC_053321	28212	Metschnikowiaceae
	NC_057617	96922	Metschnikowiaceae
	NC_022161	24896	Metschnikowiaceae
	NC_041246	160613	Orbiliaceae
	NC_041248	193195	Orbiliaceae
	NC_041444	179060	Orbiliaceae
	NC_041448	191042	Orbiliaceae
	NC_041555	146101	Orbiliaceae
	NC_042947	186056	Orbiliaceae
	NC_001762	27694	Phaffomycetaceae
	NC_015384	35683	Phaffomycetaceae
	NC_022159	48471	Phaffomycetaceae
	NC_022163	41644	Phaffomycetaceae
	NC_022164	33201	Phaffomycetaceae
	NC_022166	23268	Phaffomycetaceae
	NC_022167	51521	Phaffomycetaceae
	NC_022171	46416	Phaffomycetaceae
	NC_022175	42180	Phaffomycetaceae
	NC_037730	51126	Pichiaceae
	NW_024066106	69606	Pichiaceae
	NC_013147	76453	Pichiaceae
	NC_013145	30058	Pichiaceae
	NC_014805	41719	Pichiaceae
	NC_022151	53262	Pichiaceae
	NC_022158	43128	Pichiaceae
	NC_022165	27063	Pichiaceae
	NC_029396	55973	Pleosporomycetidae
	NC_035636	68926	Pleosporomycetidae
	NC_036039	75911	Pleosporomycetidae
	NC_036417	135790	Pleosporomycetidae
	NC_040008	98533	Pleosporomycetidae
	NC_047242	137775	Pleosporomycetidae
	NC_057095	124887	Pleosporomycetidae
	NC_009746	49761	Pleosporomycetidae
	NC_013660	26119	Pneumocystidaceae
	NC_020331	35626	Pneumocystidaceae
	NC_020332	24608	Pneumocystidaceae
	NC_022933	86451	Polyporaceae
	NC_027188	119803	Polyporaceae
	NC_037239	59039	Polyporaceae
	NC_037936	92511	Polyporaceae
	NC_037937	88194	Polyporaceae
	NC_037938	124588	Polyporaceae
	NC_054271	67318	Polyporaceae
	NC_054272	99976	Polyporaceae
	NC_026782	78447	Polyporaceae
	NC_013933	91500	Polyporaceae
	NC_021750	60635	Polyporaceae
	NC_037773	69423	Russulaceae
	NC_037774	67683	Russulaceae
	NC_037775	58585	Russulaceae
	NC_037776	56008	Russulaceae
	NC_037777	48512	Russulaceae
	NC_038054	38445	Russulaceae
	NC_038055	53895	Russulaceae
	NC_038056	60843	Russulaceae
	NC_038205	46808	Russulaceae
	NC_038206	48541	Russulaceae
	NC_045229	60995	Russulaceae
	NC_045293	60949	Russulaceae
	NC_057510	42366	Russulaceae
	NC_027457	33343	Saccharomycetaceae
	NC_027458	39201	Saccharomycetaceae
	NC_027459	45193	Saccharomycetaceae
	NC_029458	26238	Saccharomycetaceae
	NC_018056	51679	Saccharomycetaceae
	NC_031511	71124	Saccharomycetaceae
	NC_031512	64779	Saccharomycetaceae
	NC_031513	64736	Saccharomycetaceae
	NC_031514	77380	Saccharomycetaceae
	NC_031515	69019	Saccharomycetaceae
	NC_018944	925516	Saccharomycetaceae
	NC_018949	578118	Saccharomycetaceae
	NC_018950	547686	Saccharomycetaceae
	NC_016491	3019861	Saccharomycetaceae
	NC_016493	1245273	Saccharomycetaceae
	NC_016495	835708	Saccharomycetaceae
	NC_016500	468474	Saccharomycetaceae
	NC_035930	628580	Saccharomycetaceae
	NC_036023	46308	Saccharomycetaceae
	NC_036025	1745387	Saccharomycetaceae
	NC_036026	1711476	Saccharomycetaceae
	NC_036027	1588169	Saccharomycetaceae
	NC_036028	1421472	Saccharomycetaceae
	NC_036029	1353011	Saccharomycetaceae
	NC_036030	1197921	Saccharomycetaceae
	NC_036031	963005	Saccharomycetaceae
	NC_036032	939718	Saccharomycetaceae
	NC_004691	20063	Saccharomycetaceae
	NC_036374	24335	Saccharomycetaceae
	NC_036375	33299	Saccharomycetaceae
	NC_036376	34709	Saccharomycetaceae
	NC_036377	46425	Saccharomycetaceae
	NC_036378	29129	Saccharomycetaceae
	NC_036379	28524	Saccharomycetaceae
	NC_036380	46138	Saccharomycetaceae
	NC_036748	38566	Saccharomycetaceae
	NC_016756	23497	Saccharomycetaceae
	NC_025331	46256	Saccharomycetaceae
	NC_018044	71355	Saccharomycetaceae
	NW_023500906	37644	Saccharomycetaceae
	NC_001224	85779	Saccharomycetaceae
	NC_027264	78917	Saccharomycetaceae
	NC_027433	28793	Saccharomycetaceae
	NC_003920	25753	Saccharomycetaceae
	NC_012145	70578	Saccharomycetaceae
	NC_012619	37016	Saccharomycetaceae
	NC_012620	50294	Saccharomycetaceae
	NC_012621	107123	Saccharomycetaceae
	NC_004918	30782	Saccharomycetaceae
	NC_005789	23564	Saccharomycetaceae
	NC_006077	40291	Saccharomycetaceae
	NC_006626	23584	Saccharomycetaceae
	NC_040930	32669	Schizosaccharomycetaceae
	NC_001326	19431	Schizosaccharomycetaceae
	NC_004332	80059	Schizosaccharomycetaceae
	NC_035155	128852	Sclerotiniaceae
	NC_025200	203051	Sclerotiniaceae
	NC_051483	178357	Sclerotiniaceae
	NC_056195	159648	Sclerotiniaceae
	NC_030524	89084	Sordariomycetidae
	NC_030522	190834	Sordariomycetidae
	NC_030523	124412	Sordariomycetidae
	NC_035254	46507	Sordariomycetidae
	NC_018359	45590	Sordariomycetidae
	NC_015923	27125	Sordariomycetidae
