# Supplementary material for: An efficient numerical representation of genome sequence: natural vector with covariance component
Source: PeerJ. 2022 Jun 16;10:e13544. doi: 10.7717/peerj.13544 (PMC9206847; doi:10.7717/peerj.13544)
Supplement: Supplemental Information 5 [file peerj-10-13544-s005.xlsx]

## Sheet: Data S5 | Giant Virus
	Accession number	Sequence Length	Family name
	NC_002331	178733	Baculoviridae
	NC_013772	176677	Baculoviridae
	NC_008210	231801	Alloherpesviridae
	NC_008211	220859	Alloherpesviridae
	NC_009127	295146	Alloherpesviridae
	NC_013668	248526	Alloherpesviridae
	NC_002229	177874	Alloherpesviridae
	NC_002794	195859	Alloherpesviridae
	NC_003521	241087	Alloherpesviridae
	NC_006150	221454	Alloherpesviridae
	NC_006273	235646	Alloherpesviridae
	NC_012783	226205	Alloherpesviridae
	NC_016447	219474	Alloherpesviridae
	NC_016448	196691	Alloherpesviridae
	NC_002512	230138	Alloherpesviridae
	NC_004065	230278	Alloherpesviridae
	NC_006146	171096	Alloherpesviridae
	NC_009334	172764	Alloherpesviridae
	NC_001650	184439	Alloherpesviridae
	NC_005881	207439	Malacoherpesviridae
	AP018399	384670	Myoviridae
	JN638751	497513	Myoviridae
	MF360958	440001	Myoviridae
	MG592671	348911	Myoviridae
	NC_006820	196280	Myoviridae
	NC_006884	178249	Myoviridae
	NC_008296	177300	Myoviridae
	NC_009760	218948	Myoviridae
	NC_015287	232878	Myoviridae
	NC_015289	176184	Myoviridae
	NC_015569	178563	Myoviridae
	NC_016163	262391	Myoviridae
	NC_016571	284757	Myoviridae
	NC_023719	497513	Myoviridae
	NC_015281	179563	Myoviridae
	AB897757	346602	Myoviridae
	NC_027399	346602	Myoviridae
	JQ513383	345809	Myoviridae
	NC_019526	345809	Myoviridae
	KM507819	348532	Myoviridae
	NC_025447	348532	Myoviridae
	KC295538	348113	Myoviridae
	NC_027364	348113	Myoviridae
	LT603033	348043	Myoviridae
	NC_015279	190789	Myoviridae
	NC_005135	173591	Myoviridae
	NC_007022	172963	Myoviridae
	NC_015285	174285	Myoviridae
	NC_013085	194454	Myoviridae
	NC_007623	211215	Myoviridae
	KY630187	357154	Myoviridae
	LT960551	354378	Myoviridae
	LT960552	352596	Myoviridae
	NC_015280	181044	Myoviridae
	NC_015284	183806	Myoviridae
	NC_010811	231255	Myoviridae
	JN882285	358663	Myoviridae
	NC_019401	358663	Myoviridae
	KU574722	378379	Myoviridae
	NC_015290	182180	Myoviridae
	NC_004629	280334	Myoviridae
	EU197055	316674	Myoviridae
	HQ630627	309208	Myoviridae
	MF042360	309157	Myoviridae
	NC_010821	316674	Myoviridae
	NC_028999	309208	Myoviridae
	MF403008	490380	Myoviridae
	NC_015286	175230	Myoviridae
	NC_006883	252401	Myoviridae
	NC_005260	233234	Myoviridae
	NC_007023	180500	Myoviridae
	NC_014467	176788	Myoviridae
	NC_015251	235229	Myoviridae
	NC_010105	170523	Myoviridae
	NC_012741	171451	Myoviridae
	NC_014260	172253	Myoviridae
	NC_014595	170605	Myoviridae
	NC_005083	244834	Myoviridae
	NC_014036	174436	Myoviridae
	NC_014636	225268	Myoviridae
	NC_015283	176428	Myoviridae
	NC_015282	174079	Myoviridae
	NC_015288	191195	Myoviridae
	NC_007581	185683	Siphoviridae
	NC_010356	190032	Glossinavirus
	NC_007605	171823	Herpesviridae
	AF332093	305119	Nimaviridae
	AF440570	307287	Nimaviridae
	AX151396	305107	Nimaviridae
	KR083866	305119	Nimaviridae
	KT995472	309286	Nimaviridae
	KX686117	300223	Nimaviridae
	NC_003225	309286	Nimaviridae
	NC_004156	231621	Nudiviridae
	NC_006633	27346	Polydnaviridae
	NC_006634	14975	Polydnaviridae
	NC_006635	29874	Polydnaviridae
	NC_006636	15876	Polydnaviridae
	NC_006637	14489	Polydnaviridae
	NC_006638	15230	Polydnaviridae
	NC_006639	24748	Polydnaviridae
	NC_006640	5032	Polydnaviridae
	NC_006641	15959	Polydnaviridae
	NC_006642	14286	Polydnaviridae
	NC_006643	12903	Polydnaviridae
	NC_006644	16103	Polydnaviridae
	NC_006645	21388	Polydnaviridae
	NC_006646	31972	Polydnaviridae
	NC_006647	8785	Polydnaviridae
	NC_006648	15158	Polydnaviridae
	NC_006649	32108	Polydnaviridae
	NC_006650	18768	Polydnaviridae
	NC_006651	19161	Polydnaviridae
	NC_006652	4981	Polydnaviridae
	NC_006653	26062	Polydnaviridae
	NC_006654	13597	Polydnaviridae
	NC_006655	15279	Polydnaviridae
	NC_006656	12682	Polydnaviridae
	NC_006657	19820	Polydnaviridae
	NC_006658	30655	Polydnaviridae
	NC_006659	41573	Polydnaviridae
	NC_006660	20197	Polydnaviridae
	NC_006661	11186	Polydnaviridae
	NC_006662	17477	Polydnaviridae
	NC_007028	3611	Polydnaviridae
	NC_007029	6307	Polydnaviridae
	NC_007030	4576	Polydnaviridae
	NC_007031	7228	Polydnaviridae
	NC_007032	9604	Polydnaviridae
	NC_007033	7823	Polydnaviridae
	NC_007034	10790	Polydnaviridae
	NC_007035	11238	Polydnaviridae
	NC_007036	13704	Polydnaviridae
	NC_007037	15058	Polydnaviridae
	NC_007038	15218	Polydnaviridae
	NC_007039	17355	Polydnaviridae
	NC_007040	15096	Polydnaviridae
	NC_007041	13279	Polydnaviridae
	NC_007044	34334	Polydnaviridae
	NC_008837	1533	Polydnaviridae
	NC_008838	1657	Polydnaviridae
	NC_008839	1750	Polydnaviridae
	NC_008840	1859	Polydnaviridae
	NC_008841	1916	Polydnaviridae
	NC_008842	1940	Polydnaviridae
	NC_008843	1945	Polydnaviridae
	NC_008844	1948	Polydnaviridae
	NC_008845	1963	Polydnaviridae
	NC_008846	1963	Polydnaviridae
	NC_008847	2005	Polydnaviridae
	NC_008848	2066	Polydnaviridae
	NC_008849	2074	Polydnaviridae
	NC_008850	2079	Polydnaviridae
	NC_008851	2080	Polydnaviridae
	NC_008852	2094	Polydnaviridae
	NC_008853	2135	Polydnaviridae
	NC_008854	2177	Polydnaviridae
	NC_008855	2179	Polydnaviridae
	NC_008856	2195	Polydnaviridae
	NC_008857	2199	Polydnaviridae
	NC_008858	2235	Polydnaviridae
	NC_008859	2262	Polydnaviridae
	NC_008860	2285	Polydnaviridae
	NC_008861	2295	Polydnaviridae
	NC_008862	2298	Polydnaviridae
	NC_008863	2318	Polydnaviridae
	NC_008864	2341	Polydnaviridae
	NC_008865	2358	Polydnaviridae
	NC_008866	2358	Polydnaviridae
	NC_008867	2380	Polydnaviridae
	NC_008868	2395	Polydnaviridae
	NC_008869	2408	Polydnaviridae
	NC_008870	2415	Polydnaviridae
	NC_008871	2452	Polydnaviridae
	NC_008872	2454	Polydnaviridae
	NC_008873	2462	Polydnaviridae
	NC_008874	2509	Polydnaviridae
	NC_008875	2540	Polydnaviridae
	NC_008876	2548	Polydnaviridae
	NC_008877	2572	Polydnaviridae
	NC_008878	2579	Polydnaviridae
	NC_008879	2590	Polydnaviridae
	NC_008880	2598	Polydnaviridae
	NC_008881	2615	Polydnaviridae
	NC_008882	2625	Polydnaviridae
	NC_008883	2631	Polydnaviridae
	NC_008884	2636	Polydnaviridae
	NC_008885	2641	Polydnaviridae
	NC_008886	2646	Polydnaviridae
	NC_008887	2723	Polydnaviridae
	NC_008888	2723	Polydnaviridae
	NC_008889	2738	Polydnaviridae
	NC_008890	2768	Polydnaviridae
	NC_008891	2775	Polydnaviridae
	NC_008892	2785	Polydnaviridae
	NC_008893	2808	Polydnaviridae
	NC_008894	2819	Polydnaviridae
	NC_008895	2854	Polydnaviridae
	NC_008896	2856	Polydnaviridae
	NC_008897	2871	Polydnaviridae
	NC_008898	2875	Polydnaviridae
	NC_008899	2879	Polydnaviridae
	NC_008900	2924	Polydnaviridae
	NC_008901	2930	Polydnaviridae
	NC_008902	2933	Polydnaviridae
	NC_008903	2934	Polydnaviridae
	NC_008904	2944	Polydnaviridae
	NC_008905	2997	Polydnaviridae
	NC_008906	3036	Polydnaviridae
	NC_008907	3058	Polydnaviridae
	NC_008908	3083	Polydnaviridae
	NC_008909	3111	Polydnaviridae
	NC_008910	3117	Polydnaviridae
	NC_008911	3130	Polydnaviridae
	NC_008912	3141	Polydnaviridae
	NC_008913	3157	Polydnaviridae
	NC_008914	3243	Polydnaviridae
	NC_008915	3307	Polydnaviridae
	NC_008916	3331	Polydnaviridae
	NC_008917	3343	Polydnaviridae
	NC_008918	3357	Polydnaviridae
	NC_008919	3391	Polydnaviridae
	NC_008920	3403	Polydnaviridae
	NC_008921	3498	Polydnaviridae
	NC_008922	3519	Polydnaviridae
	NC_008923	3743	Polydnaviridae
	NC_008924	3761	Polydnaviridae
	NC_008925	3821	Polydnaviridae
	NC_008926	4059	Polydnaviridae
	NC_008927	4066	Polydnaviridae
	NC_008928	4340	Polydnaviridae
	NC_008929	4707	Polydnaviridae
	NC_008930	4829	Polydnaviridae
	NC_008931	4886	Polydnaviridae
	NC_008932	5156	Polydnaviridae
	NC_008933	2060	Polydnaviridae
	NC_008934	2309	Polydnaviridae
	NC_008935	2502	Polydnaviridae
	NC_008936	2588	Polydnaviridae
	NC_008937	2759	Polydnaviridae
	NC_008938	2840	Polydnaviridae
	NC_008939	3008	Polydnaviridae
	NC_008940	3140	Polydnaviridae
	NC_008941	4459	Polydnaviridae
	NC_007985	12098	Polydnaviridae
	NC_007986	7276	Polydnaviridae
	NC_007987	6567	Polydnaviridae
	NC_007988	7760	Polydnaviridae
	NC_007989	8284	Polydnaviridae
	NC_007990	8171	Polydnaviridae
	NC_007991	8315	Polydnaviridae
	NC_007992	8600	Polydnaviridae
	NC_007993	9155	Polydnaviridae
	NC_007994	9391	Polydnaviridae
	NC_007995	8864	Polydnaviridae
	NC_007996	10223	Polydnaviridae
	NC_007998	11285	Polydnaviridae
	NC_007999	11841	Polydnaviridae
	NC_008000	14531	Polydnaviridae
	NC_008001	14825	Polydnaviridae
	NC_008002	19557	Polydnaviridae
	NC_008003	15510	Polydnaviridae
	NC_008004	7887	Polydnaviridae
	NC_008005	6283	Polydnaviridae
	NC_008006	10757	Polydnaviridae
	NC_008007	15812	Polydnaviridae
	NC_008008	7604	Polydnaviridae
	NC_008946	4692	Polydnaviridae
	NC_008947	2755	Polydnaviridae
	NC_008948	4442	Polydnaviridae
	NC_008949	3510	Polydnaviridae
	NC_008950	5254	Polydnaviridae
	NC_008951	3590	Polydnaviridae
	NC_008952	4063	Polydnaviridae
	NC_008953	3935	Polydnaviridae
	NC_008954	4351	Polydnaviridae
	NC_008955	3548	Polydnaviridae
	NC_008956	3153	Polydnaviridae
	NC_008957	2851	Polydnaviridae
	NC_008958	2857	Polydnaviridae
	NC_008959	3213	Polydnaviridae
	NC_008960	3225	Polydnaviridae
	NC_008961	3293	Polydnaviridae
	NC_008962	3385	Polydnaviridae
	NC_008963	3573	Polydnaviridae
	NC_008964	3573	Polydnaviridae
	NC_008965	3591	Polydnaviridae
	NC_008966	3638	Polydnaviridae
	NC_008967	3841	Polydnaviridae
	NC_008968	3868	Polydnaviridae
	NC_008969	3957	Polydnaviridae
	NC_008970	4006	Polydnaviridae
	NC_008971	4126	Polydnaviridae
	NC_008972	4144	Polydnaviridae
	NC_008973	4180	Polydnaviridae
	NC_008976	4188	Polydnaviridae
	NC_008977	4225	Polydnaviridae
	NC_008978	4247	Polydnaviridae
	NC_008979	4264	Polydnaviridae
	NC_008980	4367	Polydnaviridae
	NC_008981	4495	Polydnaviridae
	NC_008982	4562	Polydnaviridae
	NC_008983	4720	Polydnaviridae
	NC_008984	4729	Polydnaviridae
	NC_008985	4914	Polydnaviridae
	NC_008986	5047	Polydnaviridae
	NC_008987	5050	Polydnaviridae
	NC_008988	5070	Polydnaviridae
	NC_008989	5108	Polydnaviridae
	NC_008990	5298	Polydnaviridae
	NC_008991	5328	Polydnaviridae
	NC_008992	5353	Polydnaviridae
	NC_008993	5530	Polydnaviridae
	NC_008994	5579	Polydnaviridae
	NC_008995	5848	Polydnaviridae
	NC_008996	5404	Polydnaviridae
	NC_008997	6654	Polydnaviridae
	NC_008998	8851	Polydnaviridae
	NC_008999	3402	Polydnaviridae
	NC_009000	3831	Polydnaviridae
	NC_009001	4461	Polydnaviridae
	NC_009002	4808	Polydnaviridae
	NC_009003	6145	Polydnaviridae
	DQ491001	314335	Phycodnaviridae
	DQ491002	368683	Phycodnaviridae
	DQ890022	321240	Phycodnaviridae
	JF411744	330611	Phycodnaviridae
	JX997159	326592	Phycodnaviridae
	JX997183	348463	Phycodnaviridae
	NC_000852	330611	Phycodnaviridae
	NC_008603	321240	Phycodnaviridae
	NC_008724	288047	Phycodnaviridae
	NC_009898	368683	Phycodnaviridae
	DQ491003	344691	Phycodnaviridae
	JX997153	332309	Phycodnaviridae
	JX997154	327349	Phycodnaviridae
	JX997156	306752	Phycodnaviridae
	JX997157	329890	Phycodnaviridae
	JX997160	319457	Phycodnaviridae
	JX997161	318742	Phycodnaviridae
	JX997162	309195	Phycodnaviridae
	JX997163	327107	Phycodnaviridae
	JX997164	330002	Phycodnaviridae
	JX997165	311223	Phycodnaviridae
	JX997166	305715	Phycodnaviridae
	JX997167	303810	Phycodnaviridae
	JX997168	315239	Phycodnaviridae
	JX997169	323497	Phycodnaviridae
	JX997170	345255	Phycodnaviridae
	JX997172	339653	Phycodnaviridae
	JX997173	339391	Phycodnaviridae
	JX997174	327406	Phycodnaviridae
	JX997176	326559	Phycodnaviridae
	JX997177	319583	Phycodnaviridae
	JX997179	328315	Phycodnaviridae
	JX997180	323517	Phycodnaviridae
	JX997181	325996	Phycodnaviridae
	JX997182	344863	Phycodnaviridae
	JX997184	313584	Phycodnaviridae
	JX997185	311647	Phycodnaviridae
	JX997186	320880	Phycodnaviridae
	KX857749	327147	Phycodnaviridae
	NC_009899	344691	Phycodnaviridae
	NC_032001	327147	Phycodnaviridae
	AJ890364	407339	Phycodnaviridae
	NC_007346	407339	Phycodnaviridae
	FN429076	376759	Phycodnaviridae
	HQ634145	407516	Phycodnaviridae
	JF974290	396620	Phycodnaviridae
	JF974291	400520	Phycodnaviridae
	JF974310	397298	Phycodnaviridae
	JF974311	407301	Phycodnaviridae
	JF974317	421891	Phycodnaviridae
	JF974318	411003	Phycodnaviridae
	KF481685	400762	Phycodnaviridae
	KF481686	399873	Phycodnaviridae
	KF481687	400341	Phycodnaviridae
	KF481688	401558	Phycodnaviridae
	AF204951	335593	Phycodnaviridae
	NC_002687	335593	Phycodnaviridae
	NC_010191	186713	Phycodnaviridae
	NC_013288	191761	Phycodnaviridae
	NC_014765	198519	Phycodnaviridae
	NC_014766	194022	Phycodnaviridae
	NC_014767	184095	Phycodnaviridae
	NC_014789	184409	Phycodnaviridae
	HQ634144	452892	Phycodnaviridae
	HQ634147	460002	Phycodnaviridae
	KC662249	459984	Phycodnaviridae
	NC_021312	459984	Phycodnaviridae
	HQ704802	344723	Phycodnaviridae
	HQ634146	301520	Phycodnaviridae
	KJ645900	370920	Phycodnaviridae
	KT820662	473558	Phycodnaviridae
	KY322437	668031	Phycodnaviridae
	LT906555	1473573	Phycodnaviridae
	NC_024697	370920	Phycodnaviridae
	NC_028094	473558	Phycodnaviridae
	NC_036594	1473573	Phycodnaviridae
	GU244497	617453	Mimiviridae
	NC_014637	617453	Mimiviridae
	AP017644	1182801	Mimiviridae
	AP017645	1182849	Mimiviridae
	AY653733	1181404	Mimiviridae
	HQ336222	1181549	Mimiviridae
	JN036606	981813	Mimiviridae
	KF959826	1181380	Mimiviridae
	KM982401	1200220	Mimiviridae
	KM982402	1221932	Mimiviridae
	KM982403	1179119	Mimiviridae
	KU761889	1182200	Mimiviridae
	MG602507	1258663	Mimiviridae
	MG602508	1248960	Mimiviridae
	NC_014649	1181549	Mimiviridae
	JF801956	1191693	Mimiviridae
	JN258408	1259197	Mimiviridae
	JN885991	529672	Mimiviridae
	JX885207	1230522	Mimiviridae
	JX975216	1246126	Mimiviridae
	KF493731	1181042	Mimiviridae
	KF527228	1168989	Mimiviridae
	KF527229	1244621	Mimiviridae
	KT599914	1299140	Mimiviridae
	KU877344	1208707	Mimiviridae
	LN867402	1179120	Mimiviridae
	LN871163	1180980	Mimiviridae
	LN871172	1162847	Mimiviridae
	LN871173	1104869	Mimiviridae
	LN871174	1150884	Mimiviridae
	MG807319	1242360	Mimiviridae
	NC_016072	1259197	Mimiviridae
	NC_023639	1168989	Mimiviridae
	AFYC01000005	788571	Mimiviridae
	JN885998	345413	Mimiviridae
	JX962719	1021348	Mimiviridae
	KC008572	1016844	Mimiviridae
	KY110734	1030056	Mimiviridae
	KY523104	1516267	Mimiviridae
	KY684083	1152313	Mimiviridae
	KY684084	379946	Mimiviridae
	LN867403	1214278	Mimiviridae
	LN868256	1226044	Mimiviridae
	LN868518	1242698	Mimiviridae
	LN868520	1258603	Mimiviridae
	LN868526	1216769	Mimiviridae
	LN868539	1229128	Mimiviridae
	LN868540	921986	Mimiviridae
	LN869537	970404	Mimiviridae
	LN871171	844927	Mimiviridae
	MF405918	1439508	Mimiviridae
	MG807320	1098002	Mimiviridae
	NC_020104	1021348	Mimiviridae
	KY684103	450695	Mimiviridae
	KY684104	317278	Mimiviridae
	KY684105	407933	Mimiviridae
	KY684108	451653	Mimiviridae
	KY684109	333228	Mimiviridae
	MF782455	1385869	Mimiviridae
	HQ113105	346754	Lausannevirus
	KF483846	380011	Bamfordvirae
	KT428292	349275	Bamfordvirae
	NC_015326	346754	Lausannevirus
	NC_008518	174059	Ascoviridae
	NC_009233	186262	Ascoviridae
	NC_005902	186250	Iridoviridae
	NC_008187	191100	Iridoviridae
	NC_015780	205791	Iridoviridae
	NC_003038	212482	Iridoviridae
	GU071086	368454	Marseilleviridae
	NC_013756	368454	Marseilleviridae
	AP017398	372707	Marseilleviridae
	KF261120	374041	Cannes 8 virus
	KF527888	386631	Marseilleviridae
	KM275475	369360	Marseilleviridae
	KT752522	362276	Brazilian Marseilleviridae
	KT835053	360610	Marseilleviridae
	KX066233	376207	Marseilleviridae
	KY073338	361368	Marseilleviridae
	MG827395	368078	Marseilleviridae
	NC_025412	369360	Marseilleviridae
	NC_029692	362276	Brazilian Marseilleviridae
	NC_030230	372707	Marseilleviridae
	NC_031465	360610	Marseilleviridae
	NC_033775	376207	Marseilleviridae
	NC_001659	170101	Asfarviridae
	AY318871	359853	Poxviridae
	KJ859677	306862	Poxviridae
	KX857215	351108	Poxviridae
	KX857216	326929	Poxviridae
	MG760432	359853	Poxviridae
	NC_002188	288539	Poxviridae
	NC_005309	359853	Poxviridae
	NC_024446	306862	Poxviridae
	NC_015960	175699	Poxviridae
	NC_008030	190054	Poxviridae
	NC_001731	190289	Poxviridae
	NC_001611	185578	Poxviridae
	NC_003310	196858	Poxviridae
	NC_003391	205719	Poxviridae
	NC_003663	224499	Poxviridae
	NC_004105	209771	Poxviridae
	NC_006998	194711	Poxviridae
	NC_008291	198050	Poxviridae
	NC_016924	185139	Poxviridae
	HF679132	307691	Poxviridae
	NC_002520	232392	Poxviridae
	NC_021248	307691	Poxviridae
	NC_001993	236120	Poxviridae
	NC_011587	232678	Herpesviridae
	NC_001347	230290	Herpesviridae
	NC_016154	218041	Herpesviridae
	NC_001345	172281	Herpesviridae
	NC_007997	6138	Polydnaviridae
	NC_006967	170560	Poxviridae
	NC_005858	197731	Poxviridae
	HG428764	382785	Insectomime
	KJ614390	466265	Faustovirus
	KR921745	651523	Mollivirus
	KU556803	455803	Faustovirus
	KU702948	466012	Faustovirus
	KU702949	464523	Faustovirus
	KU702950	466051	Faustovirus
	KU702951	462011	Faustovirus
	KU702952	465956	Faustovirus
	KX552040	350731	Kaumoebavirus
	LT706986	395405	Pacmanvirus
	LT839607	470659	Faustovirus
	NC_027867	651523	Mollivirus
	NC_034249	350731	Kaumoebavirus
	NC_034383	395405	Pacmanvirus
	KC977570	1908524	Pandoraviridae
	KC977571	2473870	Pandoraviridae
	KF740664	610033	Pithoviridae
	KP136319	2243109	Pandoraviridae
	KR819915	496396	Apis mellifera filamentous virus
	LT671577	589068	Cedratvirus
	LT907979	575161	Cedratvirus
	LT972217	1828956	Pandoraviridae
	LT972219	1676110	Pandoraviridae
	LT994651	460038	Brazilian cedratvirus
	LT994652	560887	Cedratvirus
	MK174290	2028440	Pandoraviridae
	NC_021858	1908524	Pandoraviridae
	NC_022098	2473870	Pandoraviridae
	NC_023423	610033	Pithoviridae
	NC_026440	2243109	Pandoraviridae
	NC_027925	496396	Apis mellifera filamentous virus
	NC_032108	589068	Cedratvirus
	NC_037665	1838258	Pandoraviridae
	NC_037666	2003191	Pandoraviridae
	NC_037667	2077288	Pandoraviridae
	LT598836	683254	Pithoviridae
	NC_028940	170286	Myoviridae
	NC_028894	170336	Myoviridae
	NC_027331	170341	Myoviridae
	NC_023584	170438	Myoviridae
	NC_028881	170473	Myoviridae
	NC_028847	170527	Myoviridae
	NC_030953	170650	Myoviridae
	NC_031047	170770	Myoviridae
	NC_031030	170788	Myoviridae
	NC_028925	170822	Myoviridae
	NC_028110	171045	Phycodnaviridae
	NC_020486	171211	Myoviridae
	NC_021530	171407	Myoviridae
	NC_028108	171454	Phycodnaviridae
	NC_028957	171541	Myoviridae
	NC_021536	171797	Myoviridae
	NC_027130	172688	Myoviridae
	NC_028857	172733	Myoviridae
	NC_019443	172879	Myoviridae
	NC_023561	173276	Myoviridae
	NC_033620	173861	Herpesviridae
	NC_031242	174307	Myoviridae
	NC_020080	174413	Myoviridae
	NC_026924	174885	Myoviridae
	NC_020859	175430	Myoviridae
	NC_027996	175720	Myoviridae
	NC_019444	176043	Myoviridae
	NC_028750	176081	Myoviridae
	NC_021344	176227	Myoviridae
	NC_035460	176688	Poxviridae
	NC_021071	177211	Myoviridae
	NC_027997	177534	Myoviridae
	NC_028683	177643	Myoviridae
	NC_029013	177688	Myoviridae
	NC_025414	178171	Myoviridae
	NC_028755	178182	Myoviridae
	NC_019398	178193	Myoviridae
	NC_028112	178262	Phycodnaviridae
	NC_021559	179063	Myoviridae
	NC_026923	179110	Myoviridae
	NC_031057	180219	Myoviridae
	NC_020474	180421	Herpesviridae
	NC_024696	180800	Herpesviridae
	NC_020845	180977	Myoviridae
	NC_028773	182145	Myoviridae
	NC_028093	182309	Phycodnaviridae
	NC_026421	182380	Herpesviridae
	NC_020875	182801	Myoviridae
	NC_019507	182833	Myoviridae
	NC_031944	185102	Myoviridae
	NC_031935	186386	Myoviridae
	NC_028238	188534	Poxviridae
	NC_028663	188632	Myoviridae
	NC_023587	189311	Myoviridae
	NC_026928	189418	Myoviridae
	NC_027132	190768	Myoviridae
	NC_026926	192108	Myoviridae
	NC_020855	192497	Myoviridae
	NC_028092	193301	Phycodnaviridae
	NC_031235	194437	Myoviridae
	NC_027204	194701	Myoviridae
	NC_028091	196300	Phycodnaviridae
	NC_023615	196456	Iridoviridae
	NC_028955	197361	Myoviridae
	NC_021901	197693	Iridoviridae
	NC_020837	198013	Myoviridae
	NC_023611	198533	Iridoviridae
	NC_035469	200223	Poxviridae
	NC_019559	202949	Herpesviridae
	NC_024450	204054	Herpesviridae
	NC_035468	204055	Poxviridae
	NC_034266	204237	Herpesviridae
	NC_023613	204815	Iridoviridae
	NC_028379	205896	Herpesviridae
	NC_028945	206713	Myoviridae
	NC_034618	207914	Alloherpesviridae
	NC_020851	208007	Siphoviridae
	NC_033423	208501	Iridoviridae
	NC_018874	211518	Herpesviridae
	NC_027213	214699	Poxviridae
	NC_019405	215710	Siphoviridae
	NC_031033	217124	Poxviridae
	NC_023610	218339	Siphoviridae
	NC_019407	218929	Siphoviridae
	NC_019411	219216	Siphoviridae
	NC_019521	219372	Myoviridae
	NC_024451	220222	Iridoviridae
	NC_019410	221828	Siphoviridae
	NC_031245	221908	Myoviridae
	NC_023688	222006	Myoviridae
	NC_031038	222832	Poxviridae
	NC_028899	222888	Myoviridae
	NC_019408	223720	Siphoviridae
	NC_028950	223932	Myoviridae
	NC_031007	223935	Myoviridae
	NC_021531	223989	Myoviridae
	NC_033176	224064	Herpesviridae
	NC_027016	226084	Herpesviridae
	NC_026927	228143	Myoviridae
	NC_021247	228750	Poxviridae
	NC_031043	229501	Myoviridae
	NC_019538	231743	Myoviridae
	NC_020231	233501	Herpesviridae
	NC_027402	240413	Myoviridae
	NC_031127	240761	Myoviridae
	NC_027707	241564	Poxviridae
	NC_019929	243050	Siphoviridae
	NC_031126	244840	Myoviridae
	NC_023426	245717	Poxviridae
	NC_031107	246290	Myoviridae
	NC_031010	246390	Myoviridae
	NC_023568	246964	Myoviridae
	NC_021529	247511	Myoviridae
	NC_028829	248088	Myoviridae
	NC_031039	251042	Myoviridae
	NC_022096	258139	Myoviridae
	NC_023557	271084	Myoviridae
	NC_019406	279967	Siphoviridae
	NC_017972	280538	Myoviridae
	NC_021246	281182	Poxviridae
	NC_024447	282356	Poxviridae
	NC_021249	282895	Poxviridae
	NC_019495	290304	Alloherpesviridae
	NC_019491	291144	Alloherpesviridae
	NC_036582	293123	Poxviridae
