# Supplementary material for: An efficient numerical representation of genome sequence: natural vector with covariance component
Source: PeerJ. 2022 Jun 16;10:e13544. doi: 10.7717/peerj.13544 (PMC9206847; doi:10.7717/peerj.13544)
Supplement: Supplemental Information 6 [file peerj-10-13544-s006.xlsx]

## Sheet: Data S5 | Fungi
	Accession number	Sequence Length	Family name
	DQ525472	813	Acarosporaceae
	DQ525473	839	Acarosporaceae
	DQ525474	811	Acarosporaceae
	DQ525475	812	Acarosporaceae
	DQ525476	812	Acarosporaceae
	DQ525477	821	Acarosporaceae
	DQ525479	823	Acarosporaceae
	DQ525480	820	Acarosporaceae
	DQ525481	814	Acarosporaceae
	DQ525482	805	Acarosporaceae
	DQ525483	816	Acarosporaceae
	DQ525484	794	Acarosporaceae
	DQ525485	761	Acarosporaceae
	DQ525486	810	Acarosporaceae
	DQ525487	799	Acarosporaceae
	DQ525488	782	Acarosporaceae
	DQ525489	798	Acarosporaceae
	DQ525490	1054	Acarosporaceae
	DQ525491	1048	Acarosporaceae
	DQ525492	1004	Acarosporaceae
	DQ525493	943	Acarosporaceae
	DQ525494	990	Acarosporaceae
	DQ525495	1126	Acarosporaceae
	DQ525496	920	Acarosporaceae
	DQ525497	929	Acarosporaceae
	DQ525498	898	Acarosporaceae
	DQ525499	909	Acarosporaceae
	DQ525500	813	Acarosporaceae
	DQ525501	893	Acarosporaceae
	DQ525502	885	Acarosporaceae
	DQ525503	880	Acarosporaceae
	DQ525504	919	Acarosporaceae
	DQ525505	935	Acarosporaceae
	DQ525506	619	Acarosporaceae
	DQ525507	575	Acarosporaceae
	DQ525508	595	Acarosporaceae
	DQ525509	575	Acarosporaceae
	DQ525510	606	Acarosporaceae
	DQ525511	573	Acarosporaceae
	DQ525512	547	Acarosporaceae
	DQ525513	526	Acarosporaceae
	DQ525514	597	Acarosporaceae
	DQ525515	585	Acarosporaceae
	DQ525516	585	Acarosporaceae
	DQ525517	585	Acarosporaceae
	DQ525518	571	Acarosporaceae
	DQ525519	556	Acarosporaceae
	DQ525520	578	Acarosporaceae
	DQ525521	579	Acarosporaceae
	DQ525522	577	Acarosporaceae
	DQ525523	558	Acarosporaceae
	DQ525524	550	Acarosporaceae
	DQ525525	802	Acarosporaceae
	DQ525527	584	Acarosporaceae
	DQ525528	580	Acarosporaceae
	DQ525529	598	Acarosporaceae
	DQ525530	590	Acarosporaceae
	DQ534451	665	Acarosporaceae
	DQ842014	763	Acarosporaceae
	EF535222	479	Acarosporaceae
	EF535223	483	Acarosporaceae
	EU034672	775	Acarosporaceae
	EU266087	746	Acarosporaceae
	EU870640	486	Acarosporaceae
	EU870641	486	Acarosporaceae
	EU870642	488	Acarosporaceae
	EU870643	483	Acarosporaceae
	EU870644	484	Acarosporaceae
	EU870645	484	Acarosporaceae
	EU870646	484	Acarosporaceae
	EU870647	484	Acarosporaceae
	EU870648	483	Acarosporaceae
	EU870649	484	Acarosporaceae
	EU870650	484	Acarosporaceae
	EU870651	484	Acarosporaceae
	EU870652	484	Acarosporaceae
	EU870653	474	Acarosporaceae
	EU870654	485	Acarosporaceae
	EU870655	483	Acarosporaceae
	EU870656	485	Acarosporaceae
	EU870657	484	Acarosporaceae
	EU870658	483	Acarosporaceae
	EU870659	485	Acarosporaceae
	EU870660	485	Acarosporaceae
	EU870661	485	Acarosporaceae
	EU870662	485	Acarosporaceae
	EU870663	485	Acarosporaceae
	EU870664	485	Acarosporaceae
	EU870665	485	Acarosporaceae
	EU870666	485	Acarosporaceae
	EU870667	485	Acarosporaceae
	EU870668	485	Acarosporaceae
	EU870669	484	Acarosporaceae
	EU870670	484	Acarosporaceae
	EU870671	484	Acarosporaceae
	EU870672	484	Acarosporaceae
	EU870673	484	Acarosporaceae
	EU870674	484	Acarosporaceae
	EU870677	463	Acarosporaceae
	EU870678	486	Acarosporaceae
	EU870679	486	Acarosporaceae
	EU870680	486	Acarosporaceae
	EU870681	486	Acarosporaceae
	EU870682	486	Acarosporaceae
	EU870683	487	Acarosporaceae
	EU870684	486	Acarosporaceae
	EU870685	486	Acarosporaceae
	EU870686	486	Acarosporaceae
	EU870687	486	Acarosporaceae
	EU870688	486	Acarosporaceae
	EU870689	487	Acarosporaceae
	EU870690	487	Acarosporaceae
	EU870691	482	Acarosporaceae
	FJ815428	521	Acarosporaceae
	FJ919809	873	Acarosporaceae
	FJ919810	935	Acarosporaceae
	FJ959356	479	Acarosporaceae
	GU184108	582	Acarosporaceae
	GU184109	809	Acarosporaceae
	GU184110	580	Acarosporaceae
	GU184111	585	Acarosporaceae
	GU184112	551	Acarosporaceae
	GU184113	583	Acarosporaceae
	GU184114	581	Acarosporaceae
	GU184115	580	Acarosporaceae
	GU184116	582	Acarosporaceae
	GU184117	542	Acarosporaceae
	GU184118	550	Acarosporaceae
	GU184119	780	Acarosporaceae
	GU184120	844	Acarosporaceae
	GU184121	844	Acarosporaceae
	GU184122	787	Acarosporaceae
	GU184123	858	Acarosporaceae
	GU184124	840	Acarosporaceae
	HQ650721	931	Acarosporaceae
	HQ650722	1125	Acarosporaceae
	HQ650723	912	Acarosporaceae
	JX036095	771	Acarosporaceae
	KC592262	595	Acarosporaceae
	KC592263	655	Acarosporaceae
	KC592264	800	Acarosporaceae
	KT695307	647	Acarosporaceae
	KY266862	574	Acarosporaceae
	KY266943	978	Acarosporaceae
	MK811748	535	Acarosporaceae
	MK811775	473	Acarosporaceae
	MK811852	545	Acarosporaceae
	MK811879	491	Acarosporaceae
	MK811920	489	Acarosporaceae
	MK811928	482	Acarosporaceae
	MK811962	617	Acarosporaceae
	MK812040	498	Acarosporaceae
	MK812119	534	Acarosporaceae
	MK812215	535	Acarosporaceae
	MK812356	542	Acarosporaceae
	MK812643	528	Acarosporaceae
	AF133760	519	Acaulosporaceae
	AF133761	511	Acaulosporaceae
	AJ504636	582	Acaulosporaceae
	AJ504649	573	Acaulosporaceae
	AJ504650	573	Acaulosporaceae
	AJ871992	546	Acaulosporaceae
	AJ871993	542	Acaulosporaceae
	AJ871994	480	Acaulosporaceae
	AJ871995	531	Acaulosporaceae
	AJ871996	540	Acaulosporaceae
	AJ871997	544	Acaulosporaceae
	AJ871998	543	Acaulosporaceae
	AJ871999	544	Acaulosporaceae
	AJ872000	547	Acaulosporaceae
	AJ872001	547	Acaulosporaceae
	AJ872002	409	Acaulosporaceae
	AJ872003	540	Acaulosporaceae
	AJ872004	529	Acaulosporaceae
	AJ872005	536	Acaulosporaceae
	AJ872006	534	Acaulosporaceae
	AJ872007	515	Acaulosporaceae
	AJ872008	531	Acaulosporaceae
	AJ872009	544	Acaulosporaceae
	AJ890446	456	Acaulosporaceae
	AJ891101	562	Acaulosporaceae
	AJ891102	561	Acaulosporaceae
	AJ891103	551	Acaulosporaceae
	AJ891104	552	Acaulosporaceae
	AJ891105	552	Acaulosporaceae
	AJ891106	572	Acaulosporaceae
	AJ891107	547	Acaulosporaceae
	AJ891108	564	Acaulosporaceae
	AJ891109	571	Acaulosporaceae
	AJ891110	561	Acaulosporaceae
	AJ891112	548	Acaulosporaceae
	AJ891113	545	Acaulosporaceae
	AJ891114	549	Acaulosporaceae
	AJ891115	525	Acaulosporaceae
	AJ891116	548	Acaulosporaceae
	AJ891117	532	Acaulosporaceae
	AJ891118	535	Acaulosporaceae
	AJ891119	536	Acaulosporaceae
	AJ891120	535	Acaulosporaceae
	AJ891121	539	Acaulosporaceae
	AJ938138	578	Acaulosporaceae
	AJ938139	555	Acaulosporaceae
	AJ938140	554	Acaulosporaceae
	AM076375	528	Acaulosporaceae
	AM076376	532	Acaulosporaceae
	AM076377	534	Acaulosporaceae
	AM076378	526	Acaulosporaceae
	AM076380	541	Acaulosporaceae
	AM076381	526	Acaulosporaceae
	AM076382	555	Acaulosporaceae
	AM076383	508	Acaulosporaceae
	AM076384	536	Acaulosporaceae
	AM384982	553	Acaulosporaceae
	AM420362	592	Acaulosporaceae
	AM420363	616	Acaulosporaceae
	AM420364	616	Acaulosporaceae
	AM420365	571	Acaulosporaceae
	AM420367	619	Acaulosporaceae
	AM420368	618	Acaulosporaceae
	AM420369	620	Acaulosporaceae
	AM420370	619	Acaulosporaceae
	AM420371	621	Acaulosporaceae
	AM420372	615	Acaulosporaceae
	AM420373	606	Acaulosporaceae
	AM420374	601	Acaulosporaceae
	AM420375	604	Acaulosporaceae
	AM420376	603	Acaulosporaceae
	AM420377	605	Acaulosporaceae
	AM420378	606	Acaulosporaceae
	AM420379	593	Acaulosporaceae
	AM420380	600	Acaulosporaceae
	AM905249	557	Acaulosporaceae
	AM905250	572	Acaulosporaceae
	AM942528	552	Acaulosporaceae
	AM942529	551	Acaulosporaceae
	AM942530	551	Acaulosporaceae
	AM942531	554	Acaulosporaceae
	AM942532	548	Acaulosporaceae
	AM942533	556	Acaulosporaceae
	AM942534	551	Acaulosporaceae
	AM942535	554	Acaulosporaceae
	AM942536	550	Acaulosporaceae
	AY248771	584	Acaulosporaceae
	AY248773	526	Acaulosporaceae
	AY248774	510	Acaulosporaceae
	AY248775	633	Acaulosporaceae
	AY248776	453	Acaulosporaceae
	DQ400135	575	Acaulosporaceae
	DQ400161	573	Acaulosporaceae
	FJ008616	602	Acaulosporaceae
	FJ008617	607	Acaulosporaceae
	FJ008618	603	Acaulosporaceae
	FM206336	833	Acaulosporaceae
	FM876781	1736	Acaulosporaceae
	FM876782	1734	Acaulosporaceae
	FM876783	1734	Acaulosporaceae
	FM876784	1731	Acaulosporaceae
	FM876785	1736	Acaulosporaceae
	FM876786	1729	Acaulosporaceae
	FM876787	1736	Acaulosporaceae
	FM876788	1713	Acaulosporaceae
	FM876789	1716	Acaulosporaceae
	FM876790	1717	Acaulosporaceae
	FM876791	1725	Acaulosporaceae
	FM876792	1701	Acaulosporaceae
	FM876793	1706	Acaulosporaceae
	FM876821	1495	Acaulosporaceae
	FM876822	1497	Acaulosporaceae
	FM876823	1496	Acaulosporaceae
	FM876824	1496	Acaulosporaceae
	FM876825	1495	Acaulosporaceae
	FM876826	1493	Acaulosporaceae
	FM876827	1496	Acaulosporaceae
	FM876828	1495	Acaulosporaceae
	FM876829	1496	Acaulosporaceae
	FM876830	1495	Acaulosporaceae
	FN547502	1737	Acaulosporaceae
	FN547503	1737	Acaulosporaceae
	FN547504	1732	Acaulosporaceae
	FN547505	1730	Acaulosporaceae
	FN547506	1732	Acaulosporaceae
	FN547507	1734	Acaulosporaceae
	FN547508	1737	Acaulosporaceae
	FN547509	1733	Acaulosporaceae
	FN547510	1733	Acaulosporaceae
	FN547511	1733	Acaulosporaceae
	FN547512	1723	Acaulosporaceae
	FN547513	1434	Acaulosporaceae
	FN547514	1432	Acaulosporaceae
	FN547515	1436	Acaulosporaceae
	FN547516	1726	Acaulosporaceae
	FN547517	1632	Acaulosporaceae
	FN547518	1432	Acaulosporaceae
	FN547519	1437	Acaulosporaceae
	FN547520	1497	Acaulosporaceae
	FN547521	1463	Acaulosporaceae
	FN547522	1497	Acaulosporaceae
	FN547523	1493	Acaulosporaceae
	FN825901	1651	Acaulosporaceae
	FN825902	1631	Acaulosporaceae
	FN825903	1499	Acaulosporaceae
	FN825904	1472	Acaulosporaceae
	FN825905	1497	Acaulosporaceae
	FN825906	1473	Acaulosporaceae
	FN825907	1700	Acaulosporaceae
	FN825908	1711	Acaulosporaceae
	FN825909	1717	Acaulosporaceae
	FN825910	1501	Acaulosporaceae
	FN825911	1498	Acaulosporaceae
	FN825912	1486	Acaulosporaceae
	FN869121	554	Acaulosporaceae
	FR681926	1686	Acaulosporaceae
	FR681928	1696	Acaulosporaceae
	FR681929	1693	Acaulosporaceae
	FR681930	1687	Acaulosporaceae
	FR681931	1626	Acaulosporaceae
	FR681933	1652	Acaulosporaceae
	FR681934	1647	Acaulosporaceae
	FR681935	1649	Acaulosporaceae
	FR681936	1642	Acaulosporaceae
	FR692350	1494	Acaulosporaceae
	FR750063	1681	Acaulosporaceae
	FR750151	1383	Acaulosporaceae
	FR750152	1424	Acaulosporaceae
	FR750153	1454	Acaulosporaceae
	FR750154	1385	Acaulosporaceae
	FR750155	1423	Acaulosporaceae
	FR750156	1455	Acaulosporaceae
	FR750168	1672	Acaulosporaceae
	FR750169	1680	Acaulosporaceae
	FR750170	1675	Acaulosporaceae
	FR750171	1675	Acaulosporaceae
	FR750172	1673	Acaulosporaceae
	FR750173	1676	Acaulosporaceae
	FR772334	1699	Acaulosporaceae
	FR846382	1493	Acaulosporaceae
	FR846385	1492	Acaulosporaceae
	FR869690	1500	Acaulosporaceae
	FR869691	1501	Acaulosporaceae
	HE603641	1484	Acaulosporaceae
	HE603642	1492	Acaulosporaceae
	HE775276	1491	Acaulosporaceae
	HE775278	1495	Acaulosporaceae
	HE775356	638	Acaulosporaceae
	HE775357	641	Acaulosporaceae
	HE858428	1477	Acaulosporaceae
	HF567932	1495	Acaulosporaceae
	HF567933	1499	Acaulosporaceae
	HF567934	1495	Acaulosporaceae
	HF567935	1495	Acaulosporaceae
	HF567936	1497	Acaulosporaceae
	HF567937	1494	Acaulosporaceae
	HF567938	1498	Acaulosporaceae
	HF567939	1500	Acaulosporaceae
	HF567940	1498	Acaulosporaceae
	HF567941	1501	Acaulosporaceae
	HF970218	1458	Acaulosporaceae
	HF970240	1462	Acaulosporaceae
	HF970293	1461	Acaulosporaceae
	HF970305	1457	Acaulosporaceae
	HG422734	1501	Acaulosporaceae
	HM570008	1468	Acaulosporaceae
	JF439089	1501	Acaulosporaceae
	JF439090	1494	Acaulosporaceae
	KF206454	1387	Acaulosporaceae
	KF206460	1423	Acaulosporaceae
	KF206469	1420	Acaulosporaceae
	KF206483	1406	Acaulosporaceae
	KF206484	1406	Acaulosporaceae
	KF206489	1397	Acaulosporaceae
	KF206502	1441	Acaulosporaceae
	KF206504	1462	Acaulosporaceae
	KF849508	1626	Acaulosporaceae
	KF849517	1530	Acaulosporaceae
	KF849522	1534	Acaulosporaceae
	KF849673	1644	Acaulosporaceae
	EU041765	479	Acrospermaceae
	EU041766	456	Acrospermaceae
	EU041767	454	Acrospermaceae
	EU041785	514	Acrospermaceae
	EU041786	528	Acrospermaceae
	EU041787	487	Acrospermaceae
	EU041788	463	Acrospermaceae
	EU041789	497	Acrospermaceae
	EU041790	520	Acrospermaceae
	JF957605	523	Acrospermaceae
	JF957606	523	Acrospermaceae
	JF957607	523	Acrospermaceae
	JF957608	523	Acrospermaceae
	JF957609	523	Acrospermaceae
	AF079673	716	Agaricaceae
	AF079677	680	Agaricaceae
	AF079683	739	Agaricaceae
	AF079687	736	Agaricaceae
	AF079690	734	Agaricaceae
	AF079711	681	Agaricaceae
	AF079717	682	Agaricaceae
	AF079722	682	Agaricaceae
	AF079725	723	Agaricaceae
	AF079742	717	Agaricaceae
	AF215648	692	Agaricaceae
	AF215649	701	Agaricaceae
	AF215654	688	Agaricaceae
	AF391001	615	Agaricaceae
	AF391036	679	Agaricaceae
	AF391066	695	Agaricaceae
	AF432880	712	Agaricaceae
	AF432893	707	Agaricaceae
	AF482836	720	Agaricaceae
	AF482852	686	Agaricaceae
	AF482853	623	Agaricaceae
	AF482866	695	Agaricaceae
	AF482871	657	Agaricaceae
	AJ237628	682	Agaricaceae
	AJ617494	699	Agaricaceae
	AJ884624	701	Agaricaceae
	AJ884625	686	Agaricaceae
	AJ884626	685	Agaricaceae
	AJ884627	685	Agaricaceae
	AJ884628	689	Agaricaceae
	AJ884629	691	Agaricaceae
	AJ884630	691	Agaricaceae
	AJ884631	690	Agaricaceae
	AJ884632	694	Agaricaceae
	AJ884633	692	Agaricaceae
	AJ884634	693	Agaricaceae
	AJ884635	693	Agaricaceae
	AJ884636	692	Agaricaceae
	AJ884637	691	Agaricaceae
	AJ884638	692	Agaricaceae
	AJ884639	693	Agaricaceae
	AJ884640	695	Agaricaceae
	AJ884641	693	Agaricaceae
	AJ884642	693	Agaricaceae
	AJ884643	701	Agaricaceae
	AJ884644	683	Agaricaceae
	AJ884645	683	Agaricaceae
	AJ884646	683	Agaricaceae
	AJ884647	689	Agaricaceae
	AJ884648	689	Agaricaceae
	AJ884649	689	Agaricaceae
	AJ884650	692	Agaricaceae
	AJ884651	692	Agaricaceae
	AJ884652	692	Agaricaceae
	AJ884653	692	Agaricaceae
	AJ884654	692	Agaricaceae
	AJ887989	693	Agaricaceae
	AJ887990	693	Agaricaceae
	AJ887991	693	Agaricaceae
	AJ887992	701	Agaricaceae
	AJ887993	694	Agaricaceae
	AJ890441	677	Agaricaceae
	AM076639	688	Agaricaceae
	AM076640	689	Agaricaceae
	AM076641	687	Agaricaceae
	AM076642	688	Agaricaceae
	AM076643	685	Agaricaceae
	AM076644	688	Agaricaceae
	AM076645	689	Agaricaceae
	AM076646	689	Agaricaceae
	AM076647	689	Agaricaceae
	AM076648	689	Agaricaceae
	AM076649	689	Agaricaceae
	AM076650	709	Agaricaceae
	AM076651	708	Agaricaceae
	AM076652	708	Agaricaceae
	AM076653	709	Agaricaceae
	AM930981	684	Agaricaceae
	AM930982	678	Agaricaceae
	AM930983	688	Agaricaceae
	AM930984	636	Agaricaceae
	AM930985	699	Agaricaceae
	AM930986	650	Agaricaceae
	AM930987	657	Agaricaceae
	AM946477	402	Agaricaceae
	AM946478	631	Agaricaceae
	AM946479	632	Agaricaceae
	AM946480	631	Agaricaceae
	AM946481	632	Agaricaceae
	AM946482	632	Agaricaceae
	AM946483	625	Agaricaceae
	AM946484	624	Agaricaceae
	AM946485	624	Agaricaceae
	AM946486	624	Agaricaceae
	AM946487	624	Agaricaceae
	AM946488	624	Agaricaceae
	AM946489	604	Agaricaceae
	AM946490	604	Agaricaceae
	AM946491	622	Agaricaceae
	AM946492	622	Agaricaceae
	AM946493	622	Agaricaceae
	AM946494	622	Agaricaceae
	AM946495	619	Agaricaceae
	AM946496	618	Agaricaceae
	AM946497	619	Agaricaceae
	AM946498	619	Agaricaceae
	AM946499	620	Agaricaceae
	AM946500	620	Agaricaceae
	AM946501	630	Agaricaceae
	AM946502	630	Agaricaceae
	AM946503	610	Agaricaceae
	AM946504	610	Agaricaceae
	AM946505	622	Agaricaceae
	AM946506	623	Agaricaceae
	AM946507	622	Agaricaceae
	AM946508	622	Agaricaceae
	AM946509	622	Agaricaceae
	AM946524	587	Agaricaceae
	AM946525	591	Agaricaceae
	AM981244	626	Agaricaceae
	AY081225	699	Agaricaceae
	AY081234	676	Agaricaceae
	AY081241	617	Agaricaceae
	AY083196	677	Agaricaceae
	AY145856	621	Agaricaceae
	AY176366	644	Agaricaceae
	AY176379	690	Agaricaceae
	AY176390	699	Agaricaceae
	AY176413	711	Agaricaceae
	AY176419	640	Agaricaceae
	AY176424	670	Agaricaceae
	AY176426	654	Agaricaceae
	AY176463	700	Agaricaceae
	AY176464	689	Agaricaceae
	AY176465	616	Agaricaceae
	AY176466	688	Agaricaceae
	AY176485	701	Agaricaceae
	AY176488	640	Agaricaceae
	AY176490	655	Agaricaceae
	AY176491	684	Agaricaceae
	AY176492	686	Agaricaceae
	AY243594	686	Agaricaceae
	AY243598	675	Agaricaceae
	AY243613	691	Agaricaceae
	AY243614	704	Agaricaceae
	AY243619	735	Agaricaceae
	AY243625	715	Agaricaceae
	AY243645	701	Agaricaceae
	AY243646	694	Agaricaceae
	DQ404388	659	Agaricaceae
	DQ486682	661	Agaricaceae
	DQ490633	630	Agaricaceae
	DQ490639	611	Agaricaceae
	DQ779956	697	Agaricaceae
	DQ779957	703	Agaricaceae
	DQ779958	723	Agaricaceae
	DQ779959	635	Agaricaceae
	DQ779960	592	Agaricaceae
	DQ911600	643	Agaricaceae
	EF080864	653	Agaricaceae
	EF080866	689	Agaricaceae
	EF080871	712	Agaricaceae
	EF121817	703	Agaricaceae
	EF460357	686	Agaricaceae
	EF460368	689	Agaricaceae
	EF460372	688	Agaricaceae
	EF635638	618	Agaricaceae
	EU071699	711	Agaricaceae
	EU081952	676	Agaricaceae
	EU081954	698	Agaricaceae
	EU131638	703	Agaricaceae
	EU141944	524	Agaricaceae
	EU141947	672	Agaricaceae
	EU141952	703	Agaricaceae
	EU166349	646	Agaricaceae
	EU166350	647	Agaricaceae
	EU257801	703	Agaricaceae
	EU257802	707	Agaricaceae
	EU257803	703	Agaricaceae
	EU257804	698	Agaricaceae
	EU258674	708	Agaricaceae
	EU258675	682	Agaricaceae
	EU258676	708	Agaricaceae
	EU258677	707	Agaricaceae
	EU273511	766	Agaricaceae
	EU326208	765	Agaricaceae
	EU363029	724	Agaricaceae
	EU363030	724	Agaricaceae
	EU363031	705	Agaricaceae
	EU363032	692	Agaricaceae
	EU363033	655	Agaricaceae
	EU363034	727	Agaricaceae
	EU363036	726	Agaricaceae
	EU363037	726	Agaricaceae
	EU416293	722	Agaricaceae
	EU416297	731	Agaricaceae
	EU520139	671	Agaricaceae
	EU561487	728	Agaricaceae
	EU561489	636	Agaricaceae
	EU561495	631	Agaricaceae
	EU561508	644	Agaricaceae
	EU681778	582	Agaricaceae
	EU784183	620	Agaricaceae
	FJ172288	708	Agaricaceae
	FJ172289	803	Agaricaceae
	FJ222602	690	Agaricaceae
	FJ223222	731	Agaricaceae
	FJ223223	731	Agaricaceae
	FJ223224	721	Agaricaceae
	FJ223225	721	Agaricaceae
	FJ223226	721	Agaricaceae
	FJ223227	721	Agaricaceae
	FJ223228	721	Agaricaceae
	FJ223229	721	Agaricaceae
	FJ223230	721	Agaricaceae
	FJ596845	677	Agaricaceae
	FJ596853	675	Agaricaceae
	FJ770387	615	Agaricaceae
	FJ770403	644	Agaricaceae
	FJ998388	683	Agaricaceae
	FJ998389	819	Agaricaceae
	FJ998390	795	Agaricaceae
	FJ998391	641	Agaricaceae
	FJ998392	441	Agaricaceae
	FJ998393	725	Agaricaceae
	FJ998394	796	Agaricaceae
	FJ998395	820	Agaricaceae
	FJ998396	816	Agaricaceae
	FJ998397	715	Agaricaceae
	FJ998398	639	Agaricaceae
	FJ998399	414	Agaricaceae
	FJ998400	813	Agaricaceae
	FJ998401	327	Agaricaceae
	FJ998402	714	Agaricaceae
	FJ998403	802	Agaricaceae
	FJ998404	563	Agaricaceae
	FJ998405	674	Agaricaceae
	FJ998406	619	Agaricaceae
	FJ998407	573	Agaricaceae
	FM163176	533	Agaricaceae
	FM163183	531	Agaricaceae
	FM163184	530	Agaricaceae
	FM878009	536	Agaricaceae
	FN430682	780	Agaricaceae
	FN430685	654	Agaricaceae
	FN430687	633	Agaricaceae
	GQ141550	719	Agaricaceae
	GQ203808	689	Agaricaceae
	GQ203819	674	Agaricaceae
	GQ258470	701	Agaricaceae
	GQ329038	702	Agaricaceae
	GQ329039	818	Agaricaceae
	GQ329040	656	Agaricaceae
	GQ329041	750	Agaricaceae
	GQ329042	744	Agaricaceae
	GQ329043	758	Agaricaceae
	GQ329044	768	Agaricaceae
	GQ329045	775	Agaricaceae
	GQ329046	691	Agaricaceae
	GQ329047	749	Agaricaceae
	GQ329048	837	Agaricaceae
	GQ329049	727	Agaricaceae
	GQ329050	698	Agaricaceae
	GQ329051	833	Agaricaceae
	GQ329052	729	Agaricaceae
	GQ329053	736	Agaricaceae
	GQ329054	687	Agaricaceae
	GQ329055	746	Agaricaceae
	GQ329056	716	Agaricaceae
	GQ329057	812	Agaricaceae
	GQ329058	749	Agaricaceae
	GQ329059	842	Agaricaceae
	GQ329060	825	Agaricaceae
	GQ329061	691	Agaricaceae
	GQ329062	727	Agaricaceae
	GQ329063	826	Agaricaceae
	GQ329064	738	Agaricaceae
	GQ375547	651	Agaricaceae
	GU062222	645	Agaricaceae
	GU084262	732	Agaricaceae
	GU134504	887	Agaricaceae
	GU136165	696	Agaricaceae
	GU136172	700	Agaricaceae
	GU136181	700	Agaricaceae
	GU136185	704	Agaricaceae
	GU136187	705	Agaricaceae
	GU136193	684	Agaricaceae
	GU136199	694	Agaricaceae
	GU136203	705	Agaricaceae
	GU139789	649	Agaricaceae
	GU202428	667	Agaricaceae
	GU202429	715	Agaricaceae
	GU202430	698	Agaricaceae
	GU296098	656	Agaricaceae
	GU327642	723	Agaricaceae
	GU327643	713	Agaricaceae
	GU903309	619	Agaricaceae
	HE974764	631	Agaricaceae
	HE974768	636	Agaricaceae
	HM004552	565	Agaricaceae
	HM125510	628	Agaricaceae
	HM125516	681	Agaricaceae
	HM125528	665	Agaricaceae
	HM240520	1179	Agaricaceae
	HM240521	1179	Agaricaceae
	HM245775	729	Agaricaceae
	HM436610	609	Agaricaceae
	HM436618	591	Agaricaceae
	HM436622	609	Agaricaceae
	HM436624	604	Agaricaceae
	HM436625	632	Agaricaceae
	HM436633	603	Agaricaceae
	HM436636	619	Agaricaceae
	HM436644	613	Agaricaceae
	HM488747	708	Agaricaceae
	HM488749	650	Agaricaceae
	HM488750	744	Agaricaceae
	HM488753	736	Agaricaceae
	HM488755	736	Agaricaceae
	HM488760	700	Agaricaceae
	HQ020412	589	Agaricaceae
	HQ020416	699	Agaricaceae
	HQ179669	614	Agaricaceae
	HQ322269	697	Agaricaceae
	HQ446472	703	Agaricaceae
	HQ455789	611	Agaricaceae
	HQ649842	683	Agaricaceae
	HQ667593	663	Agaricaceae
	HQ667595	698	Agaricaceae
	HQ718461	660	Agaricaceae
	HQ839742	654	Agaricaceae
	HQ846983	640	Agaricaceae
	HQ847014	638	Agaricaceae
	HQ847042	662	Agaricaceae
	JF440300	716	Agaricaceae
	JF440301	716	Agaricaceae
	JF495040	704	Agaricaceae
	JF495045	709	Agaricaceae
	JF495053	701	Agaricaceae
	JF495059	681	Agaricaceae
	JF495062	702	Agaricaceae
	JF495068	699	Agaricaceae
	JF495076	691	Agaricaceae
	JF514517	734	Agaricaceae
	JF514518	723	Agaricaceae
	JF514519	734	Agaricaceae
	JF514520	734	Agaricaceae
	JF514521	735	Agaricaceae
	JF514522	714	Agaricaceae
	JF514523	725	Agaricaceae
	JF514524	724	Agaricaceae
	JF514525	734	Agaricaceae
	JF514526	726	Agaricaceae
	JF514527	725	Agaricaceae
	JF514528	718	Agaricaceae
	JF514529	729	Agaricaceae
	JF514530	727	Agaricaceae
	JF514531	724	Agaricaceae
	JF514532	725	Agaricaceae
	JF514533	724	Agaricaceae
	JF514534	720	Agaricaceae
	JF514535	726	Agaricaceae
	JF514536	723	Agaricaceae
	JF514537	734	Agaricaceae
	JF514538	735	Agaricaceae
	JF514539	729	Agaricaceae
	JF514540	734	Agaricaceae
	JF514541	732	Agaricaceae
	JF514542	731	Agaricaceae
	JF514543	724	Agaricaceae
	JF691540	664	Agaricaceae
	JF691548	663	Agaricaceae
	JF691550	654	Agaricaceae
	JF691557	650	Agaricaceae
	JF727840	727	Agaricaceae
	JF727841	723	Agaricaceae
	JF727842	721	Agaricaceae
	JF727843	719	Agaricaceae
	JF727844	726	Agaricaceae
	JF727845	733	Agaricaceae
	JF727846	735	Agaricaceae
	JF727847	723	Agaricaceae
	JF727848	725	Agaricaceae
	JF727849	726	Agaricaceae
	JF727850	723	Agaricaceae
	JF727852	734	Agaricaceae
	JF727853	762	Agaricaceae
	JF727854	753	Agaricaceae
	JF727855	738	Agaricaceae
	JF727856	724	Agaricaceae
	JF727857	739	Agaricaceae
	JF727858	709	Agaricaceae
	JF727859	728	Agaricaceae
	JF727860	721	Agaricaceae
	JF727861	727	Agaricaceae
	JF727862	720	Agaricaceae
	JF727863	718	Agaricaceae
	JF727864	733	Agaricaceae
	JF727865	732	Agaricaceae
	JF727866	733	Agaricaceae
	JF727867	731	Agaricaceae
	JF727868	733	Agaricaceae
	JF727869	738	Agaricaceae
	JF727870	744	Agaricaceae
	JF727871	735	Agaricaceae
	JF797178	709	Agaricaceae
	JF797179	725	Agaricaceae
	JF797180	722	Agaricaceae
	JF797181	678	Agaricaceae
	JF797182	711	Agaricaceae
	JF797183	718	Agaricaceae
	JF797184	692	Agaricaceae
	JF797185	706	Agaricaceae
	JF797186	715	Agaricaceae
	JF797187	728	Agaricaceae
	JF797188	722	Agaricaceae
	JF797189	711	Agaricaceae
	JF797190	709	Agaricaceae
	JF797191	740	Agaricaceae
	JF797192	733	Agaricaceae
	JF797193	732	Agaricaceae
	JF797194	730	Agaricaceae
	JF797195	720	Agaricaceae
	JF797196	727	Agaricaceae
	JF797197	707	Agaricaceae
	JF797198	714	Agaricaceae
	JF797199	720	Agaricaceae
	JF797200	733	Agaricaceae
	JF797201	728	Agaricaceae
	JF797202	691	Agaricaceae
	JF797203	712	Agaricaceae
	JF896226	718	Agaricaceae
	JF896227	724	Agaricaceae
	JF896228	683	Agaricaceae
	JF896229	731	Agaricaceae
	JF896230	731	Agaricaceae
	JF896231	731	Agaricaceae
	JF907844	663	Agaricaceae
	JF907981	710	Agaricaceae
	JN021052	623	Agaricaceae
	JN021056	648	Agaricaceae
	JN021057	569	Agaricaceae
	JN021058	490	Agaricaceae
	JN021059	649	Agaricaceae
	JN043309	714	Agaricaceae
	JN159574	681	Agaricaceae
	JN180322	666	Agaricaceae
	JN204430	733	Agaricaceae
	JN204431	709	Agaricaceae
	JN204432	722	Agaricaceae
	JN204433	724	Agaricaceae
	JN204434	690	Agaricaceae
	JN204435	710	Agaricaceae
	JN204436	712	Agaricaceae
	JN204437	724	Agaricaceae
	JN222407	742	Agaricaceae
	JN222408	740	Agaricaceae
	JN222409	719	Agaricaceae
	JN222410	739	Agaricaceae
	JN222411	739	Agaricaceae
	JN222412	739	Agaricaceae
	JN222413	746	Agaricaceae
	JN222414	745	Agaricaceae
	JN222415	740	Agaricaceae
	JN224823	562	Agaricaceae
	JN234841	716	Agaricaceae
	JN234842	716	Agaricaceae
	JN234843	716	Agaricaceae
	JN592034	733	Agaricaceae
	JN592035	733	Agaricaceae
	JN592036	706	Agaricaceae
	JN592037	733	Agaricaceae
	JN592038	734	Agaricaceae
	JN662351	733	Agaricaceae
	JN662352	733	Agaricaceae
	JN664954	664	Agaricaceae
	JN944081	672	Agaricaceae
	JN944082	743	Agaricaceae
	JN944083	547	Agaricaceae
	JN944084	624	Agaricaceae
	JN944085	706	Agaricaceae
	JN944086	688	Agaricaceae
	JN944087	469	Agaricaceae
	JN944088	667	Agaricaceae
	JN944089	646	Agaricaceae
	JN944090	744	Agaricaceae
	JN944091	702	Agaricaceae
	JN944092	705	Agaricaceae
	JN944093	624	Agaricaceae
	JN944094	629	Agaricaceae
	JN944095	653	Agaricaceae
	JQ247350	894	Agaricaceae
	JQ283969	730	Agaricaceae
	JQ312174	1041	Agaricaceae
	JQ359015	735	Agaricaceae
	JQ405675	721	Agaricaceae
	JQ405691	717	Agaricaceae
	JQ405715	679	Agaricaceae
	JQ617561	580	Agaricaceae
	JQ617564	733	Agaricaceae
	JQ617570	687	Agaricaceae
	JQ617579	276	Agaricaceae
	JQ617597	580	Agaricaceae
	JQ617612	500	Agaricaceae
	JQ617651	670	Agaricaceae
	JQ617707	608	Agaricaceae
	JQ617712	551	Agaricaceae
	JQ617737	365	Agaricaceae
	JQ683099	734	Agaricaceae
	JQ683107	725	Agaricaceae
	JQ824134	719	Agaricaceae
	JQ824135	724	Agaricaceae
	JQ824136	729	Agaricaceae
	JQ901432	670	Agaricaceae
	JQ901433	669	Agaricaceae
	JQ901434	669	Agaricaceae
	JQ901435	669	Agaricaceae
	JQ901436	669	Agaricaceae
	JQ901437	669	Agaricaceae
	JQ901438	669	Agaricaceae
	JQ901439	669	Agaricaceae
	JQ901440	669	Agaricaceae
	JQ901441	669	Agaricaceae
	JQ901442	669	Agaricaceae
	JQ901443	670	Agaricaceae
	JQ901444	669	Agaricaceae
	JQ901445	669	Agaricaceae
	JQ903618	712	Agaricaceae
	JQ982502	712	Agaricaceae
	JX129889	586	Agaricaceae
	JX133168	655	Agaricaceae
	JX133169	656	Agaricaceae
	JX133170	656	Agaricaceae
	JX133171	624	Agaricaceae
	JX133172	624	Agaricaceae
	JX133173	631	Agaricaceae
	JX133174	631	Agaricaceae
	JX133246	615	Agaricaceae
	JX183075	661	Agaricaceae
	JX259056	686	Agaricaceae
	JX259062	699	Agaricaceae
	JX259064	686	Agaricaceae
	JX259069	700	Agaricaceae
	JX259070	559	Agaricaceae
	JX259086	706	Agaricaceae
	JX260730	525	Agaricaceae
	JX411959	674	Agaricaceae
	JX434658	652	Agaricaceae
	JX684008	691	Agaricaceae
	JX684009	529	Agaricaceae
	JX827168	701	Agaricaceae
	JX880032	705	Agaricaceae
	JX880033	712	Agaricaceae
	JX885459	663	Agaricaceae
	JX896446	818	Agaricaceae
	JX896447	836	Agaricaceae
	JX896448	880	Agaricaceae
	JX898040	746	Agaricaceae
	JX984565	694	Agaricaceae
	JX984722	598	Agaricaceae
	KC136140	485	Agaricaceae
	KC581337	1235	Agaricaceae
	KC797153	554	Agaricaceae
	KC900377	739	Agaricaceae
	KC900403	683	Agaricaceae
	KC920739	601	Agaricaceae
	KF114473	702	Agaricaceae
	KF114474	688	Agaricaceae
	KF114475	688	Agaricaceae
	KF114503	635	Agaricaceae
	KF306260	624	Agaricaceae
	KF316479	744	Agaricaceae
	KF318723	504	Agaricaceae
	KF410863	712	Agaricaceae
	KF447890	728	Agaricaceae
	KF447891	733	Agaricaceae
	KF447892	722	Agaricaceae
	KF447893	731	Agaricaceae
	KF447894	712	Agaricaceae
	KF447895	730	Agaricaceae
	KF447896	712	Agaricaceae
	KF447897	733	Agaricaceae
	KF447898	733	Agaricaceae
	KF447899	732	Agaricaceae
	KF447900	685	Agaricaceae
	KF447901	733	Agaricaceae
	KF447902	732	Agaricaceae
	KF447903	732	Agaricaceae
	KF447904	734	Agaricaceae
	KF447905	735	Agaricaceae
	KF447906	735	Agaricaceae
	KF447908	685	Agaricaceae
	KF453551	571	Agaricaceae
	KF573610	571	Agaricaceae
	KF703447	665	Agaricaceae
	KF727404	700	Agaricaceae
	KF727405	754	Agaricaceae
	KF727406	704	Agaricaceae
	KF727407	742	Agaricaceae
	KF727408	674	Agaricaceae
	KF853415	685	Agaricaceae
	KF854286	553	Agaricaceae
	KF854287	553	Agaricaceae
	KF881783	556	Agaricaceae
	KF881785	577	Agaricaceae
	KF983523	565	Agaricaceae
	KJ542543	532	Agaricaceae
	KJ548129	688	Agaricaceae
	KJ548130	687	Agaricaceae
	KJ548131	688	Agaricaceae
	KJ548132	688	Agaricaceae
	KJ548133	686	Agaricaceae
	KJ548134	688	Agaricaceae
	KJ548135	689	Agaricaceae
	KJ555145	400	Agaricaceae
	KJ559465	578	Agaricaceae
	KJ627786	559	Agaricaceae
	KJ652553	765	Agaricaceae
	KJ702343	693	Agaricaceae
	KJ855951	730	Agaricaceae
	KJ855958	719	Agaricaceae
	KJ855960	708	Agaricaceae
	KJ869119	687	Agaricaceae
	KJ869129	574	Agaricaceae
	KT874931	689	Agaricaceae
	KT874932	712	Agaricaceae
	KT874933	713	Agaricaceae
	KT874934	712	Agaricaceae
	KT874935	712	Agaricaceae
	KT874936	702	Agaricaceae
	KT874937	711	Agaricaceae
	KT874938	615	Agaricaceae
	KT874939	615	Agaricaceae
	LN554885	604	Agaricaceae
	MN992132	635	Agaricaceae
	MN992194	749	Agaricaceae
	MN992291	756	Agaricaceae
	MN992292	660	Agaricaceae
	MN992293	761	Agaricaceae
	MN992294	711	Agaricaceae
	MN992295	623	Agaricaceae
	MN992373	620	Agaricaceae
	MN992374	502	Agaricaceae
	MN992455	702	Agaricaceae
	MN992456	702	Agaricaceae
	MT551937	715	Agaricaceae
	MT551941	744	Agaricaceae
	MT551948	713	Agaricaceae
	U85548	512	Agaricaceae
	U85792	687	Agaricaceae
	AF444519	654	Agaricostilbaceae
	AF444551	644	Agaricostilbaceae
	AF444553	647	Agaricostilbaceae
	AF444556	656	Agaricostilbaceae
	AF444569	631	Agaricostilbaceae
	DQ832237	564	Agaricostilbaceae
	FM253093	645	Agaricostilbaceae
	GU291273	641	Agaricostilbaceae
	GU291274	403	Agaricostilbaceae
	JN942841	608	Agaricostilbaceae
	NR_073283	600	Agaricostilbaceae
	NR_073303	670	Agaricostilbaceae
	NR_073304	646	Agaricostilbaceae
	NR_073314	567	Agaricostilbaceae
	AB071770	539	Ajellomycetaceae
	AB071821	540	Ajellomycetaceae
	AB071822	539	Ajellomycetaceae
	AB071823	541	Ajellomycetaceae
	AB071824	541	Ajellomycetaceae
	AB071825	540	Ajellomycetaceae
	AB071826	541	Ajellomycetaceae
	AB071827	540	Ajellomycetaceae
	AB071828	566	Ajellomycetaceae
	AB071829	558	Ajellomycetaceae
	AB071830	551	Ajellomycetaceae
	AB071831	558	Ajellomycetaceae
	AB071832	540	Ajellomycetaceae
	AB071833	551	Ajellomycetaceae
	AB071834	551	Ajellomycetaceae
	AB071835	546	Ajellomycetaceae
	AB071836	541	Ajellomycetaceae
	AB071837	541	Ajellomycetaceae
	AB071838	541	Ajellomycetaceae
	AB071839	541	Ajellomycetaceae
	AB071840	541	Ajellomycetaceae
	AB071841	541	Ajellomycetaceae
	AB071842	542	Ajellomycetaceae
	AB071843	541	Ajellomycetaceae
	AB071844	541	Ajellomycetaceae
	AF038319	1178	Ajellomycetaceae
	AF038320	1159	Ajellomycetaceae
	AF038322	1181	Ajellomycetaceae
	AF038323	1202	Ajellomycetaceae
	AF038331	1192	Ajellomycetaceae
	DQ467835	541	Ajellomycetaceae
	DQ980237	456	Ajellomycetaceae
	EF592151	1179	Ajellomycetaceae
	EF592152	1190	Ajellomycetaceae
	EF592153	1194	Ajellomycetaceae
	EF592154	1194	Ajellomycetaceae
	EF592155	1194	Ajellomycetaceae
	EF592156	1194	Ajellomycetaceae
	EF592157	1194	Ajellomycetaceae
	EF592158	1193	Ajellomycetaceae
	EF592159	1199	Ajellomycetaceae
	EF592160	1199	Ajellomycetaceae
	EF592161	1199	Ajellomycetaceae
	EF592162	1199	Ajellomycetaceae
	EF592163	1200	Ajellomycetaceae
	EF592164	1183	Ajellomycetaceae
	EU326529	493	Ajellomycetaceae
	EU853309	593	Ajellomycetaceae
	FJ897584	942	Ajellomycetaceae
	FJ897698	978	Ajellomycetaceae
	FJ897699	908	Ajellomycetaceae
	GU320936	418	Ajellomycetaceae
	GU320937	418	Ajellomycetaceae
	GU320938	418	Ajellomycetaceae
	GU320939	418	Ajellomycetaceae
	GU320940	418	Ajellomycetaceae
	GU320941	418	Ajellomycetaceae
	GU320942	418	Ajellomycetaceae
	GU320943	418	Ajellomycetaceae
	GU320944	418	Ajellomycetaceae
	GU320945	418	Ajellomycetaceae
	GU320946	418	Ajellomycetaceae
	GU320947	418	Ajellomycetaceae
	GU320948	418	Ajellomycetaceae
	GU320949	418	Ajellomycetaceae
	GU320950	418	Ajellomycetaceae
	GU320951	418	Ajellomycetaceae
	GU320952	418	Ajellomycetaceae
	GU320953	418	Ajellomycetaceae
	GU320954	418	Ajellomycetaceae
	GU320955	418	Ajellomycetaceae
	GU320956	418	Ajellomycetaceae
	GU320957	418	Ajellomycetaceae
	GU320958	418	Ajellomycetaceae
	GU320959	418	Ajellomycetaceae
	GU320960	418	Ajellomycetaceae
	GU320961	418	Ajellomycetaceae
	GU320962	418	Ajellomycetaceae
	GU320963	418	Ajellomycetaceae
	GU320964	418	Ajellomycetaceae
	GU320965	418	Ajellomycetaceae
	GU320966	418	Ajellomycetaceae
	GU320967	418	Ajellomycetaceae
	GU320968	418	Ajellomycetaceae
	GU320969	418	Ajellomycetaceae
	GU320970	418	Ajellomycetaceae
	GU320971	418	Ajellomycetaceae
	GU320972	418	Ajellomycetaceae
	GU320973	418	Ajellomycetaceae
	GU320974	418	Ajellomycetaceae
	GU320975	418	Ajellomycetaceae
	GU320976	418	Ajellomycetaceae
	GU320977	418	Ajellomycetaceae
	GU320978	418	Ajellomycetaceae
	GU320979	418	Ajellomycetaceae
	GU320980	418	Ajellomycetaceae
	GU320981	418	Ajellomycetaceae
	GU320982	418	Ajellomycetaceae
	GU320983	418	Ajellomycetaceae
	GU320984	418	Ajellomycetaceae
	GU320985	418	Ajellomycetaceae
	GU320986	418	Ajellomycetaceae
	HF563671	536	Ajellomycetaceae
	HQ026734	543	Ajellomycetaceae
	JX051635	418	Ajellomycetaceae
	JX051636	418	Ajellomycetaceae
	JX051637	418	Ajellomycetaceae
	JX051638	418	Ajellomycetaceae
	JX051639	418	Ajellomycetaceae
	JX051640	418	Ajellomycetaceae
	JX051641	418	Ajellomycetaceae
	JX051642	418	Ajellomycetaceae
	JX051643	418	Ajellomycetaceae
	JX051644	418	Ajellomycetaceae
	JX051645	418	Ajellomycetaceae
	JX051646	418	Ajellomycetaceae
	JX051647	418	Ajellomycetaceae
	JX051648	418	Ajellomycetaceae
	JX051649	418	Ajellomycetaceae
	JX064536	542	Ajellomycetaceae
	JX398314	705	Ajellomycetaceae
	KF114472	712	Ajellomycetaceae
	KF724849	635	Ajellomycetaceae
	KF724978	540	Ajellomycetaceae
	KP132266	629	Ajellomycetaceae
	KP132267	634	Ajellomycetaceae
	KP132268	635	Ajellomycetaceae
	KP132269	661	Ajellomycetaceae
	KP132270	662	Ajellomycetaceae
	KP132271	644	Ajellomycetaceae
	KP132272	634	Ajellomycetaceae
	KP132273	636	Ajellomycetaceae
	KP132274	657	Ajellomycetaceae
	KP132275	642	Ajellomycetaceae
	KP132276	658	Ajellomycetaceae
	KP132277	636	Ajellomycetaceae
	KP132278	635	Ajellomycetaceae
	KP132279	662	Ajellomycetaceae
	KP132280	654	Ajellomycetaceae
	KP132281	658	Ajellomycetaceae
	KP132282	636	Ajellomycetaceae
	KP132283	636	Ajellomycetaceae
	KP132284	660	Ajellomycetaceae
	KP132285	658	Ajellomycetaceae
	KP132286	642	Ajellomycetaceae
	KP132287	659	Ajellomycetaceae
	KP132288	644	Ajellomycetaceae
	KP132289	657	Ajellomycetaceae
	KP132290	658	Ajellomycetaceae
	KP132291	658	Ajellomycetaceae
	KP132292	636	Ajellomycetaceae
	KP132293	657	Ajellomycetaceae
	KP132294	633	Ajellomycetaceae
	KP132295	658	Ajellomycetaceae
	KP132296	661	Ajellomycetaceae
	KP132297	647	Ajellomycetaceae
	KP132298	689	Ajellomycetaceae
	AF506393	1679	Albatrellaceae
	AF506394	1687	Albatrellaceae
	AF506395	1731	Albatrellaceae
	AF506396	1738	Albatrellaceae
	AY198189	654	Albatrellaceae
	AY198190	654	Albatrellaceae
	AY198191	654	Albatrellaceae
	AY198192	654	Albatrellaceae
	AY198193	654	Albatrellaceae
	AY198194	654	Albatrellaceae
	AY198195	654	Albatrellaceae
	AY198196	672	Albatrellaceae
	AY198197	690	Albatrellaceae
	AY198198	701	Albatrellaceae
	AY198199	688	Albatrellaceae
	AY198200	642	Albatrellaceae
	AY198201	636	Albatrellaceae
	AY198202	657	Albatrellaceae
	AY198203	687	Albatrellaceae
	AY198204	648	Albatrellaceae
	AY198205	648	Albatrellaceae
	AY198206	648	Albatrellaceae
	AY198207	648	Albatrellaceae
	AY198208	648	Albatrellaceae
	AY198209	692	Albatrellaceae
	AY198210	473	Albatrellaceae
	DQ789397	653	Albatrellaceae
	EU057115	1264	Albatrellaceae
	EU669252	590	Albatrellaceae
	EU697275	561	Albatrellaceae
	FJ439513	651	Albatrellaceae
	FJ439515	622	Albatrellaceae
	FJ439516	719	Albatrellaceae
	FJ439518	612	Albatrellaceae
	FJ439519	620	Albatrellaceae
	FJ845400	923	Albatrellaceae
	JN020965	651	Albatrellaceae
	JQ393107	611	Albatrellaceae
	JX029943	698	Albatrellaceae
	JX415334	1330	Albatrellaceae
	JX456193	576	Albatrellaceae
	KC152059	611	Albatrellaceae
	KC152060	614	Albatrellaceae
	KC152061	568	Albatrellaceae
	KC152062	516	Albatrellaceae
	KC152064	655	Albatrellaceae
	KC862285	704	Albatrellaceae
	KC987141	500	Albatrellaceae
	MN992289	761	Albatrellaceae
	AF201728	548	Aliquandostipitaceae
	FJ887914	511	Aliquandostipitaceae
	FJ887915	487	Aliquandostipitaceae
	FJ887916	536	Aliquandostipitaceae
	FJ887917	523	Aliquandostipitaceae
	JN819280	590	Aliquandostipitaceae
	JN942348	568	Aliquandostipitaceae
	JN942349	477	Aliquandostipitaceae
	JN942350	509	Aliquandostipitaceae
	JN942351	535	Aliquandostipitaceae
	JN942352	554	Aliquandostipitaceae
	JN942353	575	Aliquandostipitaceae
	JN942354	571	Aliquandostipitaceae
	JN942355	589	Aliquandostipitaceae
	JN942356	631	Aliquandostipitaceae
	JN942357	647	Aliquandostipitaceae
	DQ485670	667	Alphamycetaceae
	EF585633	614	Alphamycetaceae
	EF585646	746	Alphamycetaceae
	EF585649	754	Alphamycetaceae
	EF585663	614	Alphamycetaceae
	EF585664	673	Alphamycetaceae
	AB015682	723	Amanitaceae
	AB015683	704	Amanitaceae
	AB015686	756	Amanitaceae
	AB015688	706	Amanitaceae
	AB015689	721	Amanitaceae
	AB015692	612	Amanitaceae
	AB015702	636	Amanitaceae
	AB038764	628	Amanitaceae
	AB038765	628	Amanitaceae
	AB038766	628	Amanitaceae
	AB038767	628	Amanitaceae
	AB038768	628	Amanitaceae
	AB039792	603	Amanitaceae
	AB080774	705	Amanitaceae
	AB080775	706	Amanitaceae
	AB080776	706	Amanitaceae
	AB080777	695	Amanitaceae
	AB080778	695	Amanitaceae
	AB080779	696	Amanitaceae
	AB080780	697	Amanitaceae
	AB080781	697	Amanitaceae
	AB080782	697	Amanitaceae
	AB080783	730	Amanitaceae
	AB080784	708	Amanitaceae
	AB080785	708	Amanitaceae
	AB080786	707	Amanitaceae
	AB080787	703	Amanitaceae
	AB080788	697	Amanitaceae
	AB080789	697	Amanitaceae
	AB080790	698	Amanitaceae
	AB080791	697	Amanitaceae
	AB080792	697	Amanitaceae
	AB080793	701	Amanitaceae
	AB080794	703	Amanitaceae
	AB080795	702	Amanitaceae
	AB080973	702	Amanitaceae
	AB080974	703	Amanitaceae
	AB080975	703	Amanitaceae
	AB080976	703	Amanitaceae
	AB080977	703	Amanitaceae
	AB080978	704	Amanitaceae
	AB080979	721	Amanitaceae
	AB080980	695	Amanitaceae
	AB080981	695	Amanitaceae
	AB080982	695	Amanitaceae
	AB080983	696	Amanitaceae
	AB080984	695	Amanitaceae
	AB080985	712	Amanitaceae
	AB080986	712	Amanitaceae
	AB080987	712	Amanitaceae
	AB080988	713	Amanitaceae
	AB080989	714	Amanitaceae
	AB080990	714	Amanitaceae
	AB080991	716	Amanitaceae
	AB081291	712	Amanitaceae
	AB081292	714	Amanitaceae
	AB081293	716	Amanitaceae
	AB081294	695	Amanitaceae
	AB081295	695	Amanitaceae
	AB081296	697	Amanitaceae
	AB081297	716	Amanitaceae
	AB096043	704	Amanitaceae
	AB096044	703	Amanitaceae
	AB096045	704	Amanitaceae
	AB096046	706	Amanitaceae
	AB096047	708	Amanitaceae
	AB096048	695	Amanitaceae
	AB096049	697	Amanitaceae
	AB096050	697	Amanitaceae
	AB096051	698	Amanitaceae
	AB096052	696	Amanitaceae
	AB096053	721	Amanitaceae
	AB096054	722	Amanitaceae
	AB096055	722	Amanitaceae
	AB096056	723	Amanitaceae
	AB096057	723	Amanitaceae
	AB096058	730	Amanitaceae
	AB096059	720	Amanitaceae
	AB096060	728	Amanitaceae
	AB103329	709	Amanitaceae
	AB167727	636	Amanitaceae
	AB167728	770	Amanitaceae
	AB211054	716	Amanitaceae
	AB211055	716	Amanitaceae
	AB211056	716	Amanitaceae
	AB211057	714	Amanitaceae
	AB253517	689	Amanitaceae
	AB451969	603	Amanitaceae
	AB451970	610	Amanitaceae
	AB451971	622	Amanitaceae
	AB451972	637	Amanitaceae
	AB458887	561	Amanitaceae
	AB458888	568	Amanitaceae
	AB458889	580	Amanitaceae
	AB458890	612	Amanitaceae
	AB721449	817	Amanitaceae
	AB721450	1433	Amanitaceae
	AB721451	954	Amanitaceae
	AB721452	691	Amanitaceae
	AB721453	816	Amanitaceae
	AB750725	842	Amanitaceae
	AB750726	826	Amanitaceae
	AB750727	728	Amanitaceae
	AB755778	823	Amanitaceae
	AB757676	695	Amanitaceae
	AB758243	695	Amanitaceae
	AB758244	696	Amanitaceae
	AB759083	841	Amanitaceae
	AB759115	686	Amanitaceae
	AB759116	943	Amanitaceae
	AB759117	919	Amanitaceae
	AF335440	1217	Amanitaceae
	AJ549964	634	Amanitaceae
	AJ889919	648	Amanitaceae
	AJ889920	639	Amanitaceae
	AJ889921	687	Amanitaceae
	AJ889922	678	Amanitaceae
	AJ889923	826	Amanitaceae
	AJ889924	703	Amanitaceae
	AJ889925	584	Amanitaceae
	AM084702	698	Amanitaceae
	AM087243	733	Amanitaceae
	AM159601	687	Amanitaceae
	AM161509	713	Amanitaceae
	AM930234	430	Amanitaceae
	AY176453	674	Amanitaceae
	AY194966	642	Amanitaceae
	AY228351	1185	Amanitaceae
	AY278768	632	Amanitaceae
	AY325823	504	Amanitaceae
	AY325824	474	Amanitaceae
	AY325825	471	Amanitaceae
	AY325826	472	Amanitaceae
	AY325827	476	Amanitaceae
	AY325828	477	Amanitaceae
	AY325829	480	Amanitaceae
	AY325830	476	Amanitaceae
	AY325831	477	Amanitaceae
	AY325832	473	Amanitaceae
	AY325833	485	Amanitaceae
	AY325834	476	Amanitaceae
	AY325835	487	Amanitaceae
	AY325836	486	Amanitaceae
	AY325837	479	Amanitaceae
	AY325838	479	Amanitaceae
	AY325839	480	Amanitaceae
	AY325840	494	Amanitaceae
	AY325841	506	Amanitaceae
	AY325842	469	Amanitaceae
	AY325843	453	Amanitaceae
	AY325844	418	Amanitaceae
	AY325845	498	Amanitaceae
	AY325846	506	Amanitaceae
	AY325847	491	Amanitaceae
	DQ658859	639	Amanitaceae
	DQ658860	591	Amanitaceae
	DQ822790	658	Amanitaceae
	DQ822791	599	Amanitaceae
	DQ822792	725	Amanitaceae
	DQ974692	570	Amanitaceae
	DQ990869	683	Amanitaceae
	EF442100	557	Amanitaceae
	EF493268	632	Amanitaceae
	EF493269	515	Amanitaceae
	EF493270	681	Amanitaceae
	EF493271	676	Amanitaceae
	EF619627	661	Amanitaceae
	EF653963	633	Amanitaceae
	EU071887	641	Amanitaceae
	EU071906	642	Amanitaceae
	EU071958	603	Amanitaceae
	EU071961	638	Amanitaceae
	EU526864	413	Amanitaceae
	EU569283	736	Amanitaceae
	EU819411	683	Amanitaceae
	EU819489	626	Amanitaceae
	FJ013072	669	Amanitaceae
	FJ176716	674	Amanitaceae
	FJ176717	694	Amanitaceae
	FJ176718	674	Amanitaceae
	FJ176719	692	Amanitaceae
	FJ176720	669	Amanitaceae
	FJ176721	670	Amanitaceae
	FJ176722	631	Amanitaceae
	FJ176723	625	Amanitaceae
	FJ176724	714	Amanitaceae
	FJ176725	714	Amanitaceae
	FJ176726	715	Amanitaceae
	FJ176727	695	Amanitaceae
	FJ176728	676	Amanitaceae
	FJ176729	684	Amanitaceae
	FJ176730	682	Amanitaceae
	FJ176731	682	Amanitaceae
	FJ176732	678	Amanitaceae
	FJ176733	680	Amanitaceae
	FJ176734	647	Amanitaceae
	FJ176735	644	Amanitaceae
	FJ176736	646	Amanitaceae
	FJ176737	671	Amanitaceae
	FJ196893	1239	Amanitaceae
	FJ210727	683	Amanitaceae
	FJ375328	593	Amanitaceae
	FJ375333	549	Amanitaceae
	FJ441031	632	Amanitaceae
	FJ441032	752	Amanitaceae
	FJ441033	621	Amanitaceae
	FJ441034	635	Amanitaceae
	FJ441035	591	Amanitaceae
	FJ441036	768	Amanitaceae
	FJ441037	631	Amanitaceae
	FJ441038	689	Amanitaceae
	FJ441039	804	Amanitaceae
	FJ441040	726	Amanitaceae
	FJ441041	629	Amanitaceae
	FJ441042	628	Amanitaceae
	FJ441043	681	Amanitaceae
	FJ441044	664	Amanitaceae
	FJ441045	603	Amanitaceae
	FJ441046	635	Amanitaceae
	FJ596795	655	Amanitaceae
	FJ596834	621	Amanitaceae
	FJ596836	605	Amanitaceae
	FJ596865	638	Amanitaceae
	FJ715922	663	Amanitaceae
	FJ755188	671	Amanitaceae
	FJ890022	638	Amanitaceae
	FJ890023	638	Amanitaceae
	FJ890024	638	Amanitaceae
	FJ890025	666	Amanitaceae
	FJ890026	639	Amanitaceae
	FJ890027	564	Amanitaceae
	FJ890028	628	Amanitaceae
	FJ890029	661	Amanitaceae
	FJ890030	663	Amanitaceae
	FJ890031	664	Amanitaceae
	FJ890032	671	Amanitaceae
	FJ890033	614	Amanitaceae
	FM203300	594	Amanitaceae
	FM995560	566	Amanitaceae
	FN669170	640	Amanitaceae
	GQ250398	697	Amanitaceae
	GQ250399	627	Amanitaceae
	GQ250400	682	Amanitaceae
	GQ250401	688	Amanitaceae
	GQ250402	746	Amanitaceae
	GQ250403	765	Amanitaceae
	GQ250404	734	Amanitaceae
	GQ250405	727	Amanitaceae
	GQ250406	745	Amanitaceae
	GQ250407	752	Amanitaceae
	GQ250408	761	Amanitaceae
	GQ250409	671	Amanitaceae
	GQ250410	667	Amanitaceae
	GQ250412	651	Amanitaceae
	GQ401354	688	Amanitaceae
	GQ415317	671	Amanitaceae
	GQ486874	726	Amanitaceae
	GQ925387	611	Amanitaceae
	GU181845	441	Amanitaceae
	GU220373	572	Amanitaceae
	GU256206	600	Amanitaceae
	GU256207	612	Amanitaceae
	HM026753	538	Amanitaceae
	HM189721	703	Amanitaceae
	HM189722	259	Amanitaceae
	HM240517	1201	Amanitaceae
	HQ022230	666	Amanitaceae
	HQ529373	422	Amanitaceae
	HQ604823	1320	Amanitaceae
	HQ604824	1282	Amanitaceae
	HQ625010	636	Amanitaceae
	HQ625014	802	Amanitaceae
	HQ650724	588	Amanitaceae
	HQ650725	519	Amanitaceae
	HQ650726	635	Amanitaceae
	JF273504	690	Amanitaceae
	JF273505	685	Amanitaceae
	JF273506	676	Amanitaceae
	JF273507	682	Amanitaceae
	JF313650	634	Amanitaceae
	JF313651	635	Amanitaceae
	JF313652	634	Amanitaceae
	JF313653	638	Amanitaceae
	JF313654	638	Amanitaceae
	JF313655	620	Amanitaceae
	JF313656	621	Amanitaceae
	JF313657	620	Amanitaceae
	JF313658	644	Amanitaceae
	JF313659	630	Amanitaceae
	JF313660	645	Amanitaceae
	JF313661	644	Amanitaceae
	JF313662	642	Amanitaceae
	JF313663	642	Amanitaceae
	JF313664	644	Amanitaceae
	JF313665	644	Amanitaceae
	JF313666	645	Amanitaceae
	JF313667	644	Amanitaceae
	JF313668	644	Amanitaceae
	JF313669	642	Amanitaceae
	JF710837	485	Amanitaceae
	JF723273	768	Amanitaceae
	JF899545	790	Amanitaceae
	JF899546	842	Amanitaceae
	JF899547	842	Amanitaceae
	JF899548	852	Amanitaceae
	JF899549	807	Amanitaceae
	JF907758	570	Amanitaceae
	JN020966	606	Amanitaceae
	JN020967	606	Amanitaceae
	JN020968	516	Amanitaceae
	JN020969	502	Amanitaceae
	JN020970	628	Amanitaceae
	JN020971	628	Amanitaceae
	JN020972	625	Amanitaceae
	JN133297	687	Amanitaceae
	JN182881	527	Amanitaceae
	JN235140	625	Amanitaceae
	JN943169	652	Amanitaceae
	JN943170	689	Amanitaceae
	JN943171	705	Amanitaceae
	JN943172	634	Amanitaceae
	JN943173	676	Amanitaceae
	JN943174	685	Amanitaceae
	JN943175	556	Amanitaceae
	JN943176	675	Amanitaceae
	JN943177	685	Amanitaceae
	JN943178	715	Amanitaceae
	JN943179	727	Amanitaceae
	JN943180	727	Amanitaceae
	JN943181	655	Amanitaceae
	JQ347156	558	Amanitaceae
	JQ946325	649	Amanitaceae
	JQ991627	641	Amanitaceae
	JQ991628	636	Amanitaceae
	JQ991629	626	Amanitaceae
	JQ991630	535	Amanitaceae
	JQ991631	631	Amanitaceae
	JQ991632	642	Amanitaceae
	JQ991633	409	Amanitaceae
	JQ991634	609	Amanitaceae
	JQ991635	663	Amanitaceae
	JQ991636	610	Amanitaceae
	JQ991637	548	Amanitaceae
	JQ991638	631	Amanitaceae
	JX029928	728	Amanitaceae
	JX029932	729	Amanitaceae
	JX122508	643	Amanitaceae
	JX122509	646	Amanitaceae
	JX122510	648	Amanitaceae
	JX122511	635	Amanitaceae
	JX122730	604	Amanitaceae
	JX398315	690	Amanitaceae
	JX398316	713	Amanitaceae
	JX398317	679	Amanitaceae
	JX398318	670	Amanitaceae
	JX398319	679	Amanitaceae
	JX398320	567	Amanitaceae
	JX398321	700	Amanitaceae
	JX398322	674	Amanitaceae
	JX398323	684	Amanitaceae
	JX398324	641	Amanitaceae
	JX398325	652	Amanitaceae
	JX398326	651	Amanitaceae
	JX398327	682	Amanitaceae
	JX398328	649	Amanitaceae
	JX398329	656	Amanitaceae
	JX398982	484	Amanitaceae
	JX844674	550	Amanitaceae
	JX844675	542	Amanitaceae
	JX844676	437	Amanitaceae
	JX844677	499	Amanitaceae
	JX844678	552	Amanitaceae
	JX844679	552	Amanitaceae
	JX844680	550	Amanitaceae
	JX844681	552	Amanitaceae
	JX844682	536	Amanitaceae
	JX844683	552	Amanitaceae
	JX844684	449	Amanitaceae
	JX844685	547	Amanitaceae
	JX844686	546	Amanitaceae
	JX844687	546	Amanitaceae
	JX844688	544	Amanitaceae
	JX844689	499	Amanitaceae
	JX844690	475	Amanitaceae
	JX844691	475	Amanitaceae
	JX844692	549	Amanitaceae
	JX844693	549	Amanitaceae
	JX844694	549	Amanitaceae
	JX844695	549	Amanitaceae
	JX844696	536	Amanitaceae
	JX844697	547	Amanitaceae
	JX844698	395	Amanitaceae
	JX844699	551	Amanitaceae
	JX844700	551	Amanitaceae
	JX844701	551	Amanitaceae
	JX844702	548	Amanitaceae
	JX844703	552	Amanitaceae
	JX844704	552	Amanitaceae
	JX844705	552	Amanitaceae
	JX844707	403	Amanitaceae
	JX844708	452	Amanitaceae
	JX844709	454	Amanitaceae
	JX844710	556	Amanitaceae
	JX844711	556	Amanitaceae
	JX844712	550	Amanitaceae
	JX844713	550	Amanitaceae
	JX844714	454	Amanitaceae
	JX844715	460	Amanitaceae
	JX844716	448	Amanitaceae
	JX844717	446	Amanitaceae
	JX844718	454	Amanitaceae
	JX844719	484	Amanitaceae
	JX844720	535	Amanitaceae
	JX844721	535	Amanitaceae
	JX844722	537	Amanitaceae
	JX844723	535	Amanitaceae
	JX844724	537	Amanitaceae
	JX844725	537	Amanitaceae
	JX844726	535	Amanitaceae
	JX844727	552	Amanitaceae
	JX844728	446	Amanitaceae
	JX844729	446	Amanitaceae
	JX844730	470	Amanitaceae
	JX844731	524	Amanitaceae
	JX844732	526	Amanitaceae
	JX844733	494	Amanitaceae
	JX844734	494	Amanitaceae
	JX844735	495	Amanitaceae
	JX844736	447	Amanitaceae
	JX844737	511	Amanitaceae
	JX844738	511	Amanitaceae
	JX844739	447	Amanitaceae
	JX844740	445	Amanitaceae
	JX844741	447	Amanitaceae
	JX844742	447	Amanitaceae
	JX844743	444	Amanitaceae
	JX844744	546	Amanitaceae
	JX844745	547	Amanitaceae
	JX844746	547	Amanitaceae
	JX844748	424	Amanitaceae
	JX844749	495	Amanitaceae
	JX844750	495	Amanitaceae
	JX844751	505	Amanitaceae
	JX844752	443	Amanitaceae
	JX844753	505	Amanitaceae
	JX844754	299	Amanitaceae
	JX844755	522	Amanitaceae
	JX844756	524	Amanitaceae
	JX844757	535	Amanitaceae
	JX844758	482	Amanitaceae
	JX844760	484	Amanitaceae
	JX844761	482	Amanitaceae
	JX844762	483	Amanitaceae
	JX844763	480	Amanitaceae
	JX845138	580	Amanitaceae
	JX998019	629	Amanitaceae
	JX998020	630	Amanitaceae
	JX998021	646	Amanitaceae
	JX998022	646	Amanitaceae
	JX998023	615	Amanitaceae
	JX998024	621	Amanitaceae
	JX998025	609	Amanitaceae
	JX998026	609	Amanitaceae
	JX998027	609	Amanitaceae
	JX998028	624	Amanitaceae
	JX998029	624	Amanitaceae
	JX998030	624	Amanitaceae
	JX998031	609	Amanitaceae
	JX998032	597	Amanitaceae
	JX998033	635	Amanitaceae
	JX998034	635	Amanitaceae
	JX998035	559	Amanitaceae
	JX998036	597	Amanitaceae
	JX998037	597	Amanitaceae
	JX998038	510	Amanitaceae
	JX998039	444	Amanitaceae
	JX998043	573	Amanitaceae
	JX998163	510	Amanitaceae
	KC137267	556	Amanitaceae
	KC152065	632	Amanitaceae
	KC152067	656	Amanitaceae
	KC152070	704	Amanitaceae
	KC408939	453	Amanitaceae
	KC429049	706	Amanitaceae
	KC429050	651	Amanitaceae
	KC429051	672	Amanitaceae
	KC429789	522	Amanitaceae
	KC581323	1222	Amanitaceae
	KC689739	560	Amanitaceae
	KC689741	515	Amanitaceae
	KC689743	506	Amanitaceae
	KC691452	707	Amanitaceae
	KC797156	561	Amanitaceae
	KC841904	664	Amanitaceae
	KC841905	665	Amanitaceae
	KC841906	666	Amanitaceae
	KC841907	664	Amanitaceae
	KC842197	601	Amanitaceae
	KC855218	679	Amanitaceae
	KC855219	615	Amanitaceae
	KC855220	615	Amanitaceae
	KC855221	699	Amanitaceae
	KC855222	1738	Amanitaceae
	KC855223	1735	Amanitaceae
	KC855224	1749	Amanitaceae
	KC855225	1751	Amanitaceae
	KC855226	1736	Amanitaceae
	KC857285	550	Amanitaceae
	KF017929	578	Amanitaceae
	KF017930	565	Amanitaceae
	KF017931	723	Amanitaceae
	KF017932	732	Amanitaceae
	KF017933	576	Amanitaceae
	KF017934	500	Amanitaceae
	KF017935	557	Amanitaceae
	KF017936	575	Amanitaceae
	KF017937	671	Amanitaceae
	KF017938	563	Amanitaceae
	KF017939	671	Amanitaceae
	KF017940	577	Amanitaceae
	KF017941	568	Amanitaceae
	KF017942	655	Amanitaceae
	KF017943	661	Amanitaceae
	KF017944	661	Amanitaceae
	KF017945	683	Amanitaceae
	KF017946	693	Amanitaceae
	KF017947	662	Amanitaceae
	KF017948	569	Amanitaceae
	KF017949	569	Amanitaceae
	KF017950	521	Amanitaceae
	KF018088	601	Amanitaceae
	KF245909	644	Amanitaceae
	KF245910	669	Amanitaceae
	KF245911	686	Amanitaceae
	KF245912	678	Amanitaceae
	KF245913	652	Amanitaceae
	KF245914	623	Amanitaceae
	KF245915	616	Amanitaceae
	KF245916	616	Amanitaceae
	KF245917	605	Amanitaceae
	KF245918	628	Amanitaceae
	KF245919	665	Amanitaceae
	KF245920	661	Amanitaceae
	KF245921	530	Amanitaceae
	KF245922	692	Amanitaceae
	KF245923	637	Amanitaceae
	KF246063	742	Amanitaceae
	KF258720	680	Amanitaceae
	KF258721	682	Amanitaceae
	KF258722	684	Amanitaceae
	KF258723	580	Amanitaceae
	KF385262	645	Amanitaceae
	KF561973	624	Amanitaceae
	KF561974	526	Amanitaceae
	KF561975	678	Amanitaceae
	KF562191	510	Amanitaceae
	KF657309	476	Amanitaceae
	KF803243	718	Amanitaceae
	KF803244	761	Amanitaceae
	KF803245	846	Amanitaceae
	KF803246	716	Amanitaceae
	KF803353	498	Amanitaceae
	KF808312	1066	Amanitaceae
	KF815739	695	Amanitaceae
	KF816166	573	Amanitaceae
	KF819518	2519	Amanitaceae
	KF859750	697	Amanitaceae
	KF859751	699	Amanitaceae
	KF859752	697	Amanitaceae
	KF859753	632	Amanitaceae
	KF859754	650	Amanitaceae
	KF859755	632	Amanitaceae
	KF859757	631	Amanitaceae
	KF860882	614	Amanitaceae
	KF861801	581	Amanitaceae
	KF977188	696	Amanitaceae
	KF977197	662	Amanitaceae
	KJ146701	1132	Amanitaceae
	KJ466402	660	Amanitaceae
	KJ466410	611	Amanitaceae
	KJ466411	610	Amanitaceae
	KJ466421	586	Amanitaceae
	KJ466433	542	Amanitaceae
	KJ469342	522	Amanitaceae
	KJ469652	1068	Amanitaceae
	KJ535439	713	Amanitaceae
	KJ540086	572	Amanitaceae
	KJ540971	548	Amanitaceae
	KT695366	545	Amanitaceae
	KT874940	568	Amanitaceae
	KT874941	614	Amanitaceae
	KT874942	615	Amanitaceae
	KT874943	617	Amanitaceae
	KT874944	626	Amanitaceae
	KT874945	630	Amanitaceae
	KT874946	633	Amanitaceae
	KT874947	657	Amanitaceae
	KT874948	657	Amanitaceae
	KT874949	658	Amanitaceae
	KT874950	655	Amanitaceae
	KT874951	657	Amanitaceae
	KT874952	656	Amanitaceae
	KT874953	544	Amanitaceae
	KT874955	543	Amanitaceae
	KT874956	566	Amanitaceae
	KT874957	630	Amanitaceae
	KT874958	747	Amanitaceae
	MN992222	754	Amanitaceae
	MN992296	613	Amanitaceae
	MN992297	693	Amanitaceae
	MN992298	650	Amanitaceae
	MN992299	716	Amanitaceae
	MN992300	625	Amanitaceae
	MN992301	818	Amanitaceae
	MN992463	752	Amanitaceae
	MT551932	633	Amanitaceae
	MT551943	788	Amanitaceae
	AB048634	563	Ambisporaceae
	AB048636	562	Ambisporaceae
	AB048651	563	Ambisporaceae
	AB048659	562	Ambisporaceae
	AB048660	556	Ambisporaceae
	AB048662	574	Ambisporaceae
	AB048681	556	Ambisporaceae
	AB048682	563	Ambisporaceae
	AJ567807	609	Ambisporaceae
	AM268197	807	Ambisporaceae
	AM268198	811	Ambisporaceae
	AM268199	1104	Ambisporaceae
	AM268200	1103	Ambisporaceae
	AM268201	1104	Ambisporaceae
	AM268202	1104	Ambisporaceae
	AM268203	1106	Ambisporaceae
	AM743187	537	Ambisporaceae
	FJ769313	583	Ambisporaceae
	FJ769314	580	Ambisporaceae
	FJ769322	581	Ambisporaceae
	FN547524	1698	Ambisporaceae
	FN547525	1693	Ambisporaceae
	FN547526	1698	Ambisporaceae
	FN547527	1698	Ambisporaceae
	FN547528	1693	Ambisporaceae
	FN547529	1707	Ambisporaceae
	FN547530	1693	Ambisporaceae
	FN547531	1706	Ambisporaceae
	FN547532	1693	Ambisporaceae
	FN547533	1693	Ambisporaceae
	FN547534	1694	Ambisporaceae
	FN547535	1520	Ambisporaceae
	FN547536	1515	Ambisporaceae
	FN547537	1517	Ambisporaceae
	FN547538	1519	Ambisporaceae
	FN547539	1517	Ambisporaceae
	FN547540	1516	Ambisporaceae
	FN547541	1520	Ambisporaceae
	FN547542	1519	Ambisporaceae
	FN547543	1516	Ambisporaceae
	FN547544	1523	Ambisporaceae
	FN547545	1522	Ambisporaceae
	FN547546	1519	Ambisporaceae
	FN820281	598	Ambisporaceae
	FN820282	594	Ambisporaceae
	FR750157	1519	Ambisporaceae
	HF970300	1469	Ambisporaceae
	KF206549	1426	Ambisporaceae
	AY204592	679	Amniculicolaceae
	AY204593	488	Amniculicolaceae
	AY204594	680	Amniculicolaceae
	AY204595	495	Amniculicolaceae
	AY204596	679	Amniculicolaceae
	FJ887921	465	Amniculicolaceae
	AB594795	551	Amphisphaeriaceae
	AB594797	551	Amphisphaeriaceae
	AJ269843	515	Amphisphaeriaceae
	AM176717	567	Amphisphaeriaceae
	DQ789380	537	Amphisphaeriaceae
	DQ789381	537	Amphisphaeriaceae
	DQ789385	480	Amphisphaeriaceae
	DQ812938	538	Amphisphaeriaceae
	DQ813421	537	Amphisphaeriaceae
	DQ813422	482	Amphisphaeriaceae
	DQ813428	482	Amphisphaeriaceae
	DQ813434	480	Amphisphaeriaceae
	DQ872671	617	Amphisphaeriaceae
	EF055186	604	Amphisphaeriaceae
	EF055199	606	Amphisphaeriaceae
	EF055200	608	Amphisphaeriaceae
	EF055201	605	Amphisphaeriaceae
	EF055202	604	Amphisphaeriaceae
	EF055203	604	Amphisphaeriaceae
	EF055204	596	Amphisphaeriaceae
	EF055205	601	Amphisphaeriaceae
	EF055206	603	Amphisphaeriaceae
	FJ175154	515	Amphisphaeriaceae
	FJ175155	515	Amphisphaeriaceae
	FJ175156	473	Amphisphaeriaceae
	FJ175157	509	Amphisphaeriaceae
	FJ197893	593	Amphisphaeriaceae
	FN435688	505	Amphisphaeriaceae
	FN435728	466	Amphisphaeriaceae
	GQ869901	589	Amphisphaeriaceae
	HQ608004	822	Amphisphaeriaceae
	JF440975	1955	Amphisphaeriaceae
	JF440976	1909	Amphisphaeriaceae
	JN578610	592	Amphisphaeriaceae
	DQ494686	548	Amylocorticiaceae
	DQ494688	645	Amylocorticiaceae
	DQ534576	629	Amylocorticiaceae
	GU187500	660	Amylocorticiaceae
	GU187505	634	Amylocorticiaceae
	GU187506	651	Amylocorticiaceae
	GU187507	639	Amylocorticiaceae
	GU187508	673	Amylocorticiaceae
	GU187512	692	Amylocorticiaceae
	GU187539	629	Amylocorticiaceae
	GU187554	694	Amylocorticiaceae
	GU187555	733	Amylocorticiaceae
[truncated: 93,543 more rows]
