# Supplementary material for: An efficient numerical representation of genome sequence: natural vector with covariance component
Source: PeerJ journal article supplement (doi:10.7717/peerj.13544), 2022-06-16

A

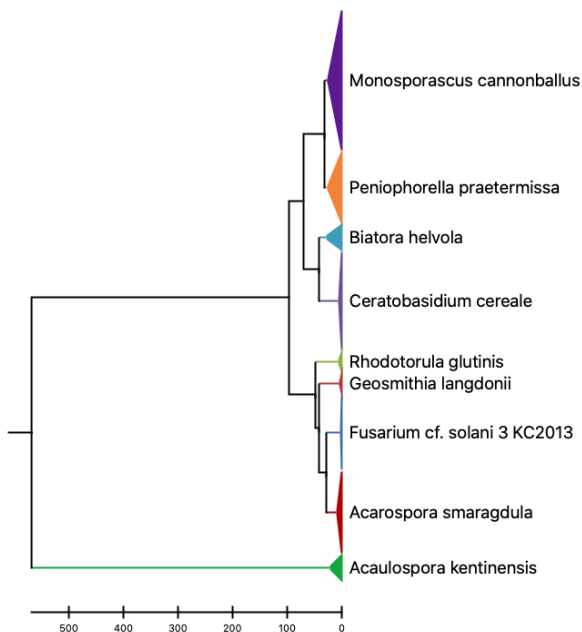

B

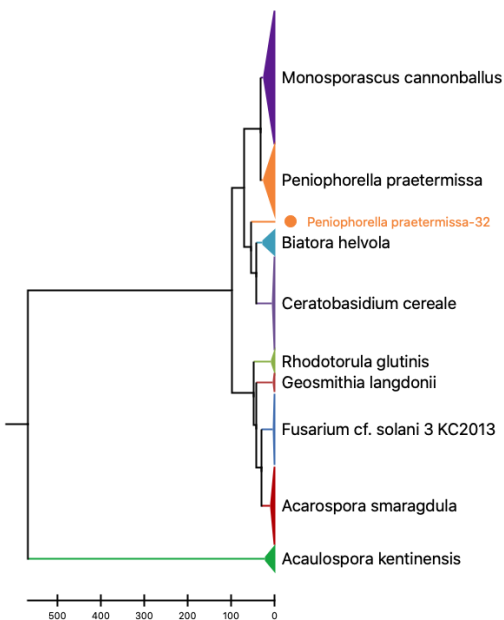

Supplement: Supplemental_Figure_S8.pdf [file Supplemental_Figure_S8.pdf]
