# Supplementary material for: An efficient numerical representation of genome sequence: natural vector with covariance component
Source: PeerJ journal article supplement (doi:10.7717/peerj.13544), 2022-06-16
Supplement: Supplemental_Figure_S10.pdf [file Supplemental_Figure_S10.pdf]

A

Results for job muscle-E20220325-110902-0806-14276329-p1m

- Alignments
- Result Summary
- Phylogenetic Tree
- Results Viewers
- Submission Details

Download Phylogenetic Tree Data

Phylogenetic Tree

This is a Neighbour-joining tree without distance corrections.

Branch length: ☐ Cladogram ☒ Real

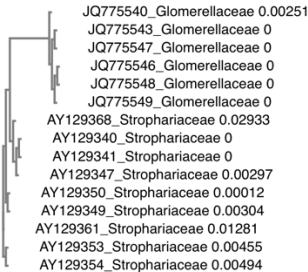

B

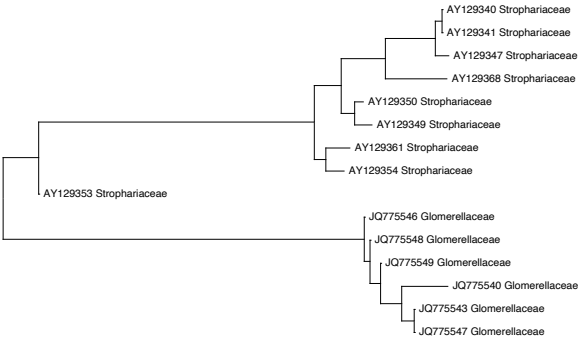

10
